# Supplementary material for: Asymmetric hydrogenation of maleic anhydrides catalyzed by Rh/bisphosphine-thiourea: efficient construction of chiral succinic anhydrides
Source: Royal Society of Chemistry journal article supplement (doi:10.1039/c7cc01626c), 2017-01-01
Supplement: c7cc01626c1.pdf [file c7cc01626c1.pdf]

## *Supporting information*

### **Highly Enantioselective Synthesis of Chiral Succinic anhydrides via Rh/Bisphosphine-Thiourea-Catalyzed Asymmetric Hydrogenation**

Zhengyu Han,<sup>a</sup> Rui Wang,<sup>a</sup> Guoxian Gu,<sup>b</sup> Xiu-Qin Dong,<sup>\*a</sup> Xumu Zhang<sup>\*b,a</sup>

<sup>a</sup> College of Chemistry and Molecular Sciences, Wuhan University, Wuhan, Hubei 430072, P. R. China.

<sup>b</sup> Department of Chemistry, South University of Science and Technology of China, Shenzhen, 518000, P.R. China.

E-mail address: xumu@whu.edu.cn, xiuqindong@whu.edu.cn.

## **Content**

|                                                                |    |
|----------------------------------------------------------------|----|
| I. General Remarks.....                                        | 2  |
| II. General Procedure for the Synthesis of the substrates..... | 2  |
| III. Asymmetric Hydrogenation of Maleic Anhydrides.....        | 7  |
| IV. References.....                                            | 13 |
| V. NMR Spectra.....                                            | 14 |
| VI. HPLC Spectra.....                                          | 37 |

## I. General Remarks

All the reactions dealing with air- or moisture-sensitive compounds were carried out in a dry reaction vessel under a positive pressure of nitrogen or in the nitrogen-filled glovebox. Unless otherwise noted, all reagents and solvents were purchased from commercial suppliers without further purification. Anhydrous solvents were purchased from Sigma-Aldrich and transferred by syringe.  $^1\text{H}$  NMR and  $^{13}\text{C}$  NMR spectra were recorded on a Bruker ADVANCE III (400 MHz) spectrometer with  $\text{CDCl}_3$  or  $(\text{CD}_3)_2\text{CO}$  as the solvent and tetramethylsilane (TMS) as the internal standard. Chemical shifts are reported in parts per million (ppm,  $\delta$  scale) downfield from TMS at 0.00 ppm and referenced to the  $\text{CDCl}_3$  at 7.26 ppm (for  $^1\text{H}$  NMR) or 77.0 ppm (for  $^{13}\text{C}$  NMR) or to  $(\text{CD}_3)_2\text{CO}$  at 2.05 ppm (for  $^1\text{H}$  NMR) or 29.8 ppm, 206.3 ppm (for  $^{13}\text{C}$  NMR). Data are reported as: multiplicity (s = singlet, d = doublet, t = triplet, q = quartet, m = multiplet), coupling constant in hertz (Hz) and signal area integration in natural numbers.  $^{13}\text{C}$  NMR analyses were run with decoupling. Enantiomeric excess values were determined by Daicel chiral column on an Agilent 1260 Series HPLC instrument. Optical rotations  $[\alpha]_{\text{D}}$  were measured on a PERKIN ELMER polarimeter 343 instrument.

All the 3-substituted maleic anhydrides were prepared according to the literature.<sup>[1]</sup> The absolute configuration of products **2a** and **2l** were determined by comparison of analytical data with the literature (HPLC spectra, optical rotation).<sup>[2]</sup> The absolute configuration of others were assigned by analogy.

## II. General Procedure for the Synthesis of the substrates

### Method A: <sup>1a</sup>

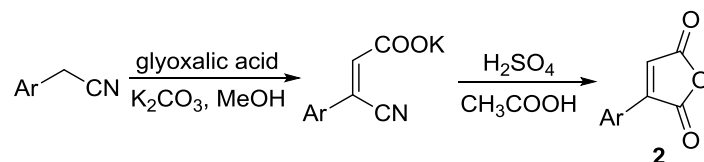

Condensation of arylacetonitriles with glyoxylic acid. A mixture of 20 mmol of the appropriate arylacetonitrile, 25 mmol of glyoxylic acid hydrate, and 50 mmol of potassium carbonate in 40 mL of methanol was stirred at room temperature or reflux for 3-24 h. The resulting thick solid precipitate was filtered and washed with dichloromethane. This solid was suspended in 100 mL of cold water,

stirred overnight, and then filtered and air dried to provide the corresponding potassium (2)-3-aryl-3-cyanopropenoate.

The potassium (Z)-3-aryl-3-cyanopropenoates (10 mmol) were dissolved in ca. 25 mL of 88% formic acid containing 1.5 mL of concentrated sulfuric acid. These mixtures were heated at reflux for 2-3 h and then cooled and poured into ice water. The resulting solids were filtered, washed with water, and air dried to provide the arylmaleic anhydrides.

Substrates **1a-1j** were prepared through method A.

**Method B:**<sup>1b</sup>

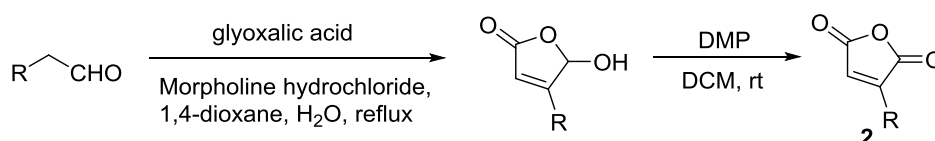

Solid morpholine hydrochloride (3.4 g, 27.5 mmol) was added to a solution of glyoxylic acid monohydrate (2.3 g, 25 mmol) in 20 mL of dioxane. To this suspension was added dropwise 3 mL of H<sub>2</sub>O, after which all of the solid material was dissolved. A solution of appropriate alkylaldehyde (26.25 mmol) in 5 mL of dioxane was added via syringe, and the colorless solution was stirred at ambient temperature for 3 h and then heated to 100 °C and stirred overnight. The reaction mixture was evaporated and extracted 3 times with Et<sub>2</sub>O, and the combined organic layers were then washed with saturated NaHCO<sub>3</sub> (aq.) and brine, dried over MgSO<sub>4</sub>, and concentrated. The residue was purified with column chromatography to obtain desired 5-hydroxy-4-aryl-2(5H)-furanone.

To a stirred solution of 5-hydroxy-4-aryl-2(5H)-furanone (2 mmol) in DCM (10 mL) was added Dess–Martin periodinane (4 mmol) in one portion and the mixture was stirred for further 3 h in room temperature. After TLC shows starting material has disappeared, the reaction mixture was concentrated under reduced pressure, and the resulting residue was separated by column chromatography (hexane:EtOAc = 10:1) to give the desired maleic anhydrides.

Substrates **1k-1n** were prepared through method B.

**Esterification:**<sup>3</sup>

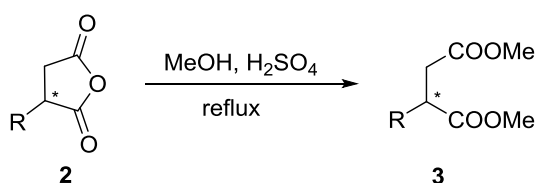

A solution of succinic anhydride **2** (0.1 mmol) in dry methanol (1 mL) containing concentrated sulfuric acid (1 drops) was heated at reflux under anhydrous conditions. After 12 h, the solution was concentrated to near dryness on a rotary vacuum evaporator. The residue was dissolved in chloroform and the solution was washed successively with saturated NaHCO<sub>3</sub> and water before being dried over anhydrous MgSO<sub>4</sub>. Removal of solvent under reduced pressure afforded dimethyl succinate as a colorless oil that was sufficiently pure to be used directly in the next step without further purification.

The configuration of **2a** and **2l** was determined as by comparing the optical rotation data with the reported by the literature after esterification of the anhydride.<sup>2a, 2b</sup> The configuration of **2j** and **2k** was determined by comparing the optical rotation data with the reported by the literature directly.<sup>2a</sup>

#### 2-phenylmaleic anhydride **1a**

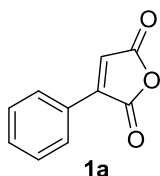

White solid; 1.3 g, 38% total yield; <sup>1</sup>H NMR (400 MHz, CDCl<sub>3</sub>): δ (ppm) 8.00-7.97 (m, 2H), 7.60-7.50 (m, 3H), 7.01 (s, 1H); <sup>13</sup>C NMR (101 MHz, CDCl<sub>3</sub>): δ (ppm) 164.6, 163.7, 146.9, 132.8, 129.4, 129.1, 126.8, 124.5. HRMS (ESI): [M+H<sup>+</sup>] Calc. 175.0395, found 175.0390.

#### 2-(3-methylphenyl)-maleic anhydride **1b**

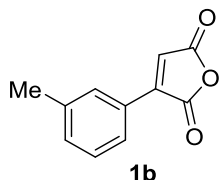

White solid, 410 mg, 22% total yield (10 mmol scale); <sup>1</sup>H NMR (400 MHz, (CD<sub>3</sub>)<sub>2</sub>CO): δ (ppm) 7.79-7.77 (m, 2H), 7.43-7.37 (m, 2H), 6.98 (s, 1H), 2.43 (s, 3H); <sup>13</sup>C NMR (101 MHz, (CD<sub>3</sub>)<sub>2</sub>CO): δ (ppm) 168.2, 165.3, 149.6, 138.7, 133.8, 131.1, 128.9, 127.3, 124.0, 116.3, 20.5. HRMS (ESI): [M+H<sup>+</sup>] Calc. 189.0552, found 189.0545.

2-(4-methylphenyl)-maleic anhydride **1c**

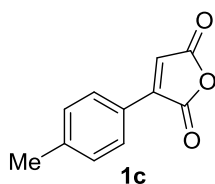

White solid; 180 mg, 10% total yield (10 mmol scale);  $^1\text{H}$  NMR (400 MHz,  $(\text{CD}_3)_2\text{CO}$ ):  $\delta$  (ppm) 8.01 (d,  $J = 8.0\text{ Hz}$ , 2H), 7.45 (s, 1H), 7.39 (d,  $J = 8.0\text{ Hz}$ , 2H), 2.42 (s, 3H);  $^{13}\text{C}$  NMR (101 MHz,  $(\text{CD}_3)_2\text{CO}$ ):  $\delta$  (ppm) 165.4, 164.4, 146.4, 143.1, 129.8, 129.0, 125.0, 124.6, 20.7. HRMS (ESI):  $[\text{M}+\text{H}^+]$  Calc. 189.0552, found 189.0545.

2-(2-methoxyphenyl)-maleic anhydride **1d**

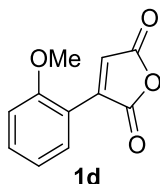

Yellow solid; 210 mg, 11% total yield (10 mmol scale);  $^1\text{H}$  NMR (400 MHz,  $\text{CDCl}_3$ ):  $\delta$  (ppm) 8.35-8.33 (m, 1H), 7.54-7.50 (m, 1H), 7.39 (s, 1H), 7.12-7.08 (m, 1H), 7.04-7.02 (m, 1H), 3.97 (s, 3H);  $^{13}\text{C}$  NMR (101 MHz,  $\text{CDCl}_3$ ):  $\delta$  (ppm) 165.6, 165.1, 160.0, 141.9, 133.8, 131.7, 127.6, 121.1, 116.2, 111.2, 55.8. HRMS (ESI):  $[\text{M}+\text{H}^+]$  Calc. 205.0501, found 204.0495.

2-(2-fluorophenyl)-maleic anhydride **1e**

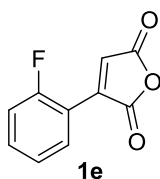

White yellow solid, mp 95-99 °C; 580 mg, 15% total yield;  $^1\text{H}$  NMR (400 MHz,  $(\text{CD}_3)_2\text{CO}$ ):  $\delta$  (ppm) 8.27-8.23 (m, 1H), 7.72-7.67 (m, 1H), 7.47-7.38 (m, 2H), 7.45 (s, 1H);  $^{13}\text{C}$  NMR (101 MHz,  $(\text{CD}_3)_2\text{CO}$ ):  $\delta$  (ppm) 165.0, 164.3, 161.8 (d,  $J = 253.0\text{ Hz}$ ), 140.5, 134.1 (d,  $J = 10.1\text{ Hz}$ ), 131.2 (d,  $J = 2.0\text{ Hz}$ ), 129.4 (d,  $J = 13.1\text{ Hz}$ ), 124.9 (d,  $J = 4.0\text{ Hz}$ ), 116.4 (d,  $J = 22.2\text{ Hz}$ ), 115.9 (d,  $J = 11.1\text{ Hz}$ ). HRMS (ESI):  $[\text{M}+\text{H}^+]$  Calc. 193.0301, found 193.0295.

2-(3-fluorophenyl)-maleic anhydride **1f**

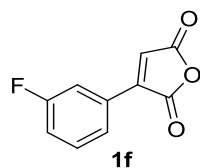

Light yellow solid, mp 88-91 °C; 930 mg, 24% total yield; <sup>1</sup>H NMR (400 MHz, (CD<sub>3</sub>)<sub>2</sub>CO): δ (ppm) 7.84-7.81 (m, 1H), 7.77-7.73 (m, 1H), 7.53-7.48 (m, 1H), 7.51 (s, 1H), 7.03-7.25 (m, 1H); <sup>13</sup>C NMR (101 MHz, (CD<sub>3</sub>)<sub>2</sub>CO): δ (ppm) 165.0, 164.0, 162.7 (d, *J* = 246.4 Hz), 145.2 (d, *J* = 3.0 Hz), 131.2 (d, *J* = 8.0 Hz), 129.7 (d, *J* = 9.0 Hz), 127.3, 125.2 (d, *J* = 3.0 Hz), 118.9 (d, *J* = 21.2 Hz), 115.6 (d, *J* = 23.2 Hz). HRMS (ESI): [M+H<sup>+</sup>] Calc. 193.0301, found 193.0295.

2-(4-fluorophenyl)-maleic anhydride **1g**

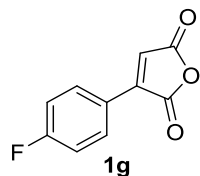

White solid; 580 mg, 15% total yield; <sup>1</sup>H NMR (400 MHz, CDCl<sub>3</sub>): δ (ppm) 8.05-8.01 (m, 2H), 7.24-7.20 (m, 2H), 6.97 (s, 1H); <sup>13</sup>C NMR (101 MHz, CDCl<sub>3</sub>): δ (ppm) 165.3 (d, *J* = 254.0 Hz), 164.6, 163.5, 145.7, 131.5 (d, *J* = 10.0 Hz), 123.9 (d, *J* = 2.0 Hz), 123.1 (d, *J* = 4.0 Hz), 116.9 (d, *J* = 22.2 Hz). HRMS (ESI): [M-H<sup>+</sup>] Calc. 193.0301, found 193.0295.

2-(4-chlorophenyl)-maleic anhydride **1h**

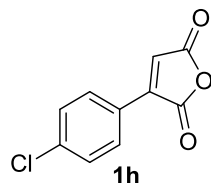

Light yellow solid; 1.8 g, 43% total yield; <sup>1</sup>H NMR (400 MHz, CDCl<sub>3</sub>): δ (ppm) 7.95-7.93 (m, 2H), 7.52-7.50 (m, 2H), 7.01 (s, 1H); <sup>13</sup>C NMR (101 MHz, CDCl<sub>3</sub>): δ (ppm) 164.4, 163.4, 145.7, 139.4, 130.3, 129.8, 125.2, 124.7. HRMS (ESI): [M+H<sup>+</sup>] Calc. 209.0005, found 209.0000.

2-(3-chlorophenyl)-maleic anhydride **1i**

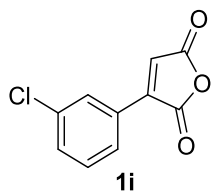

White solid, mp 89-94 °C; 500 mg, 24% total yield; <sup>1</sup>H NMR (400 MHz, CDCl<sub>3</sub>): δ (ppm) 7.97 (s, 1H), 7.89-7.87 (m, 1H), 7.57-7.54 (m, 1H), 7.49-7.46 (m, 1H), 7.05 (s, 1H); <sup>13</sup>C NMR (101 MHz, CDCl<sub>3</sub>): δ (ppm) 164.1, 163.2, 145.6, 135.6, 132.7, 130.7, 128.9, 128.3, 127.1, 125.7. HRMS (ESI): [M+H<sup>+</sup>] Calc. 209.0005, found 209.0000.

*N*-phenylmethyl-2-phenyl-maleic anhydride **1k**

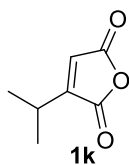

Colorless liquid; 310 mg, 9% total yield; <sup>1</sup>H NMR (400 MHz, (CD<sub>3</sub>)<sub>2</sub>CO): δ (ppm) 6.55 (s, 1H), 2.91-2.84 (m, 1H), 1.26 (d, *J* = 8.0 Hz, 6H); <sup>13</sup>C NMR (101 MHz, (CD<sub>3</sub>)<sub>2</sub>CO): δ (ppm) 165.3, 164.1, 159.3, 127.1, 26.6, 20.5. HRMS (ESI): [M+H<sup>+</sup>] Calc. 141.0552, found 141.0545.

*N*-phenyl-2-phenyl-maleic anhydride **1l**

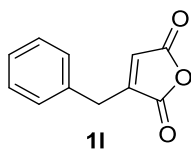

White solid; 550mg, 24% total yield (10 mmol scale); mp 87-91 °C; <sup>1</sup>H NMR (400 MHz, CDCl<sub>3</sub>): δ (ppm) 7.38-7.33 (m, 3H), 7.24-7.22 (m, 2H), 6.42-6.41 (m, 1H), 2.82 (s, 1H); <sup>13</sup>C NMR (101 MHz, CDCl<sub>3</sub>): δ (ppm) 165.6, 163.6, 152.8, 134.3, 129.5, 129.3, 129.0, 127.8, 32.4. HRMS (ESI): [M+H<sup>+</sup>] Calc. 189.0552, found 189.0546.

### III. General Procedure for Asymmetric Hydrogenation of Chiral Maleic Anhydrides

In the nitrogen-filled glovebox, a solution of ZhaoPhos (1.0 eq.) and Rh(NBD)<sub>2</sub>BF<sub>4</sub> (3.7 mg, 0.005 mmol) in 1.0 mL anhydrous ethyl acetate (EA) was stirred at room temperature for 40 min.

100  $\mu$ L of the resulting solution transferred by syringe into a vial charged with **1** (0.1 mmol) in 0.9 mL anhydrous EA. The vials were transferred to an autoclave, which was then charged with 1 atm of  $H_2$  and stirred at room temperature for 30min. The solution was passed through short column of silica gel (about 4 cm) to remove the metal complex and concentrated. The product was analyzed by NMR spectroscopy for conversion and chiral HPLC or GC for ee values.

*(R)*-3-phenylsuccinic anhydride **2a**

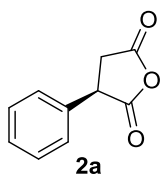

White solid; >99% conversion; 17.1 mg, 98% yield; 97% ee;  $[\alpha]_D^{20} = -76.09$  ( $c = 1.0$ ,  $CHCl_3$ ); The enantiomeric excess was determined by HPLC on Chiralpak AD-H column, hexane: isopropanol = 98:2; flow rate = 1.0 mL/min; UV detection at 210 nm;  $t_R = 46.8$  min (major), 52.8 min (minor).  $^1H$  NMR (400 MHz,  $CDCl_3$ )  $\delta = 7.44$ -7.36 (m, 3H), 7.28-7.25 (m, 2H), 4.37-4.33 (m, 1H), 3.51-3.44 (m, 1H), 3.16-3.10 (m, 1H);  $^{13}C$  NMR (101 MHz,  $CDCl_3$ )  $\delta = 170.5$ , 168.4, 133.5, 128.5, 127.7, 126.2, 45.5, 35.7. HRMS (ESI):  $[M+H]^+$  Calc. 177.0552, found 177.0546.

*(R)*-3-(2-methoxyphenyl)-succinic anhydride **2b**

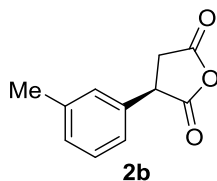

Colorless liquid; >99% conversion; 18.1 mg, 95% yield; 96% ee;  $[\alpha]_D^{20} = -65.70$  ( $c = 1.0$ , EA); The enantiomeric excess was determined by HPLC on Chiralpak AD-H column, hexane: isopropanol = 97:3; flow rate = 1.0 mL/min; UV detection at 210 nm;  $t_R = 65.8$  min (major), 75.2 min (minor).  $^1H$  NMR (400 MHz,  $(CD_3)_2CO$ )  $\delta = 7.31$ -7.28 (m, 2H), 7.24-7.23 (m, 1H), 7.19-7.17 (m, 1H), 4.65-4.60 (m, 1H), 3.62-3.55 (m, 1H), 3.30-3.24 (m, 1H), 2.34 (s, 3H);  $^{13}C$  NMR (101 MHz,  $(CD_3)_2CO$ )  $\delta = 172.9$ , 170.5, 138.6, 136.0, 128.9, 128.7, 128.6, 125.1, 46.6, 36.5, 20.5. HRMS (ESI):  $[M+H]^+$  Calc. 189.0552, found 189.0546.



(*R*)-3-(3-methoxyphenyl)-succinic anhydride **2c**

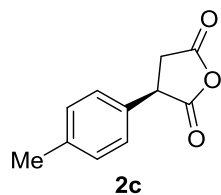

White solid, mp 153-157 °C; >99% conversion; 18.6 mg, 98% yield; >99% ee;  $[\alpha]_D^{20} = -60.60$  ( $c = 1.0$ ,  $\text{CHCl}_3$ ); The enantiomeric excess was determined by HPLC on Chiralpak AS-H column, hexane: isopropanol = 95:5; flow rate = 1.0 mL/min; UV detection at 210 nm;  $t_R = 70.4$  min (major), 83.8 min (minor).  $^1\text{H}$  NMR (400 MHz,  $\text{CDCl}_3$ )  $\delta = 7.23$ -7.21 (m, 2H), 7.16-7.12 (m, 2H) 4.32-4.28 (m, 1H), 3.48-3.40 (m, 1H), 3.13-3.06 m, 1H), 2.36 (s, 3H);  $^{13}\text{C}$  NMR (101 MHz,  $\text{CDCl}_3$ )  $\delta = 170.8$ , 168.6, 137.6, 130.6, 129.1, 126.1, 45.2, 35.7, 20.1. HRMS (ESI):  $[\text{M}+\text{H}^+]$  Calc. 189.0552, found 189.0546.

(*R*)-3-(4-methoxyphenyl)-succinic anhydride **2d**

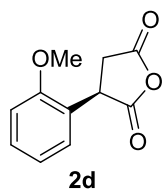

Yellow solid; >99% conversion; 20.4 mg, 99% yield; 96% ee;  $[\alpha]_D^{20} = -81.93$  ( $c = 1.0$ ,  $\text{CHCl}_3$ ); The enantiomeric excess was determined by HPLC on Chiralpak AD-H column, hexane: isopropanol = 90:10; flow rate = 1.0 mL/min; UV detection at 220 nm;  $t_R = 19.0$  min (major), 24.6 min (minor).  $^1\text{H}$  NMR (400 MHz,  $\text{CDCl}_3$ )  $\delta = 7.38$ -7.33 (m, 1H), 7.21-7.19 (m, 1H), 6.99-6.92 (m, 2H), 4.16-4.12 (m, 1H), 3.83 (s, 1H), 3.33-3.25 (m, 1H), 3.05-2.99 (m, 1H);  $^{13}\text{C}$  NMR (101 MHz,  $\text{CDCl}_3$ )  $\delta = 171.7$ , 169.6, 155.4, 129.9, 129.3, 123.2, 120.2, 110.3, 54.5, 43.6, 34.9. HRMS (ESI):  $[\text{M}+\text{H}^+]$  Calc. 207.0652, found 207.0648.

(*R*)-3-(2-fluorophenyl)-succinic anhydride **2e**

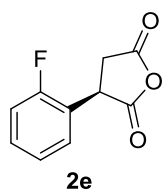

Light yellow solid, mp 85-89 °C; >99% conversion; 18.5 mg, 95% yield; >99% ee;  $[\alpha]_{\text{D}}^{25} = -33.40$  ( $c = 1.0$ , EA); The enantiomeric excess was determined by HPLC on Chiralpak AD-H column, hexane: isopropanol = 98:2; flow rate = 1.0 mL/min; UV detection at 210 nm;  $t_{\text{R}} = 45.9$  min (major), 55.8 min (minor).  $^1\text{H}$  NMR (400 MHz,  $\text{CDCl}_3$ )  $\delta = 7.41$ -7.36 (m, 1H), 7.30-7.26 (m, 1H), 7.21-7.13 (m, 2H), 4.41-4.36 (m, 1H), 3.50-3.42 (m, 1H), 3.11-3.05 (m, 1H);  $^{13}\text{C}$  NMR (101 MHz,  $\text{CDCl}_3$ )  $\delta = 170.1$ , 168.1, 159.4 ( $d$ ,  $J = 247.5$  Hz), 129.9 ( $d$ ,  $J = 11.1$  Hz), 129.2 ( $d$ ,  $J = 4.0$  Hz), 124.0 ( $d$ ,  $J = 4.0$  Hz), 121.6 ( $d$ ,  $J_{\text{C}} = 14.1$  Hz), 115.3 ( $d$ ,  $J = 20.2$  Hz), 41.4 ( $d$ ,  $J = 1.0$  Hz), 35.2 ( $d$ ,  $J = 2.0$  Hz). HRMS (ESI):  $[\text{M}+\text{H}^+]$  Calc. 195.0457, found 195.0453.

(*R*)-3-(3-fluorophenyl)-succinic anhydride **2f**

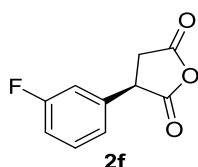

White solid; >99% conversion; 18.2 mg, 94% yield; 95% ee;  $[\alpha]_{\text{D}}^{20} = -52.04$  ( $c = 1.0$ ,  $\text{CHCl}_3$ ); The enantiomeric excess was determined by HPLC on Chiralpak AD-H column, hexane: isopropanol = 93:7; flow rate = 1.0 mL/min; UV detection at 220 nm;  $t_{\text{R}} = 27.9$  min (minor), 34.5 min (major).  $^1\text{H}$  NMR (400 MHz,  $\text{CDCl}_3$ )  $\delta = 7.43$ -7.38 (m, 1H), 7.11-7.01 (m, 3H), 4.38-4.34 (m, 1H), 3.53-3.45 (m, 1H), 3.16-3.10 (m, 1H);  $^{13}\text{C}$  NMR (101 MHz,  $\text{CDCl}_3$ )  $\delta = 169.9$ , 167.9, 162.0 ( $d$ ,  $J = 249.5$  Hz), 135.5 ( $d$ ,  $J = 7.0$  Hz), 130.2 ( $d$ ,  $J = 8.0$  Hz), 121.9 ( $d$ ,  $J = 3.0$  Hz), 114.9 ( $d$ ,  $J = 20.2$  Hz), 113.8 ( $d$ ,  $J = 23.2$  Hz), 45.0 ( $d$ ,  $J = 2.0$  Hz), 35.4. HRMS (ESI):  $[\text{M}+\text{H}^+]$  Calc. 195.0457, found 195.0453.

(*R*)-3-(4-fluorophenyl)-succinic anhydride **2g**

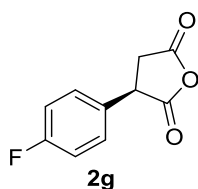

Light yellow solid, mp 159-163 °C; >99% conversion; 18.6 mg, 96% yield; 98% ee;  $[\alpha]_{\text{D}}^{20} = -86.90$  ( $c = 1.0$ ,  $\text{CHCl}_3$ ); The enantiomeric excess of **4g** was determined by corresponding di-methyl ester **3g**; HPLC on Chiralpak OJ-H column, hexane: isopropanol = 90:10; flow rate = 1.0 mL/min;

UV detection at 230 nm;  $t_R$  = 14.9 min (major), 16.2 min (minor).  $^1\text{H}$  NMR (400 MHz,  $\text{CDCl}_3$ )  $\delta$  = 7.29-7.24 (m, 2H), 7.14-7.09 (m, 2H), 4.37-4.33 (m, 1H), 3.52-3.44 (m, 1H), 3.14-3.07 (m, 1H);  $^{13}\text{C}$  NMR (101 MHz,  $\text{CDCl}_3$ )  $\delta$  = 170.4, 168.1, 161.7 (d,  $J$  = 248 Hz), 129.2 (d,  $J$  = 3.0 Hz), 128.1 (d,  $J$  = 8.0 Hz), 115.5 (d,  $J$  = 22.0 Hz), 44.8, 35.6. HRMS (ESI):  $[\text{M}+\text{H}^+]$  Calc. 195.0457, found 195.0453.

**(*R*)-3-(4-chlorophenyl)-succinic anhydride **2h****

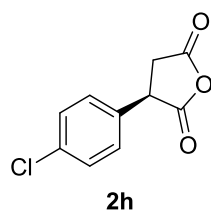

Light yellow solid; >99% conversion; 20.4 mg, 98% yield; 93% ee;  $[\alpha]_D^{20}$  = -72.60 ( $c$  = 1.0,  $\text{CHCl}_3$ ); The enantiomeric excess of **4h** was determined by corresponding methyl-ester **4h**: HPLC on Chiralpak OJ-H column, hexane: isopropanol = 98:2; flow rate = 1.0 mL/min; UV detection at 220 nm;  $t_R$  = 21.6 min (major), 24.9 min (minor).  $^1\text{H}$  NMR (400 MHz,  $\text{CDCl}_3$ )  $\delta$  = 7.41-7.38 (m, 2H), 7.24-7.21 (m, 2H), 4.36-4.32 (m, 1H), 3.51-3.44 (m, 1H), 3.13-3.06 (m, 1H);  $^{13}\text{C}$  NMR (101 MHz,  $\text{CDCl}_3$ )  $\delta$  = 170.2, 168.0, 133.8, 131.8, 128.7, 127.7, 44.8, 35.4. HRMS (ESI):  $[\text{M}-\text{H}^+]$  Calc. 209.0005, found 209.0004.

**(*R*)-3-(4-bromophenyl)-succinic anhydride **2i****

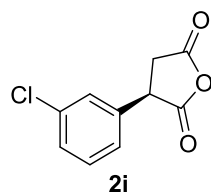

White solid; >99% conversion; 20.7 mg, 97% yield; 93% ee;  $[\alpha]_D^{20}$  = -59.10 ( $c$  = 1.0,  $\text{CHCl}_3$ ); The enantiomeric excess was determined by HPLC on Chiralpak AD-H column, hexane: isopropanol = 93:7; flow rate = 1.0 mL/min; UV detection at 210 nm;  $t_R$  = 27.4 min (major), 33.3 min (minor).  $^1\text{H}$  NMR (400 MHz,  $\text{CDCl}_3$ )  $\delta$  = 7.37-7.29 (m, 2H), 7.19 (d,  $J$  = 4.0 Hz, 1H), 7.17-7.16 (m, 1H), 4.36-4.32 (m, 1H), 3.52-3.44 (m, 1H), 3.15-3.09 (m, 1H);  $^{13}\text{C}$  NMR (101 MHz,  $\text{CDCl}_3$ )  $\delta$  = 169.9, 167.9, 135.2, 134.3, 129.8, 128.0, 126.7, 124.4, 45.0, 35.4. HRMS (ESI):  $[\text{M}-\text{H}^+]$  Calc.

209.0005, found 209.0004.

**(R)-3-methyl-succinic anhydride 2j**

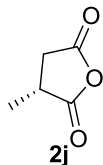

Colorless liquid; >99% conversion; 11.3 mg, 99% yield; 96% ee;  $[\alpha]_D^{20} = -36.60$  ( $c = 1.0$ ,  $\text{CHCl}_3$ ); The enantiomeric excess was determined by GC on Chiralpak  $\beta$ -dex225 column, 100 °C, 0 min, 10 °C/min, 150 °C, 25 min;  $t_R = 18.5$  min (minor), 19.2 min (major).  $^1\text{H}$  NMR (400 MHz,  $\text{CDCl}_3$ )  $\delta = 3.23$ -3.13 (m, 2H), 2.67-2.59 (m, 1H), 1.46 (d,  $J = 4.0$  Hz, 3H);  $^{13}\text{C}$  NMR (101 MHz,  $\text{CDCl}_3$ )  $\delta = 173.2$ , 178.8, 35.0, 34.6, 15.2. HRMS (ESI):  $[\text{M}+\text{H}^+]$  Calc. 115.0395, found 115.0392.

**(S)- 3-isopropyl-succinic anhydride 2k**

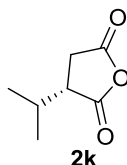

Colorless liquid; >99% conversion; 13.7 mg, 97% yield; 95% ee;  $[\alpha]_D^{20} = 23.70$  ( $c = 1.0$ ,  $\text{CHCl}_3$ ); The enantiomeric excess was determined by GC on Chiralpak  $\beta$ -dex120 column, 100 °C, 0 min, 2 °C/min, 120 °C, 25 min;  $t_R = 28.3$  min (minor), 28.9 min (major).  $^1\text{H}$  NMR (400 MHz,  $\text{CDCl}_3$ )  $\delta = 3.11$ -3.06 (m, 1H), 3.02-2.95 (m, 1H), 2.77-2.71 (m, 1H), 2.33-2.29 (m, 1H), 1.05 (d,  $J = 8.0$  Hz, 3H), 1.00 (d,  $J = 8.0$  Hz, 3H);  $^{13}\text{C}$  NMR (101 MHz,  $\text{CDCl}_3$ )  $\delta = 171.8$ , 169.3, 45.7, 29.6, 28.2, 18.7, 17.0. HRMS (ESI):  $[\text{M}+\text{H}^+]$  Calc. 143.0708, found 143.0702.

**(S)-3-benzyl-succinic anhydride 2l**

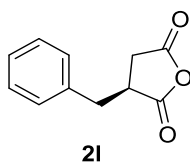

White solid; >99% conversion; 18.3 mg, 96% yield; 90% ee;  $[\alpha]_D^{20} = 42.70$  ( $c = 1.0$ ,  $\text{CHCl}_3$ )

(4I:  $[\alpha]_{\text{D}}^{20} = +82.33$  ( $c = 1.0$ ,  $\text{CHCl}_3$ )); The enantiomeric excess was determined by HPLC on Chiralpak AD-H column, hexane: isopropanol = 90:10; flow rate = 1.0 mL/min; UV detection at 210 nm;  $t_{\text{R}} = 15.7$  min (major), 17.2 min (minor).  $^1\text{H}$  NMR (400 MHz,  $\text{CDCl}_3$ )  $\delta = 7.37$ -7.27 (m, 3H), 7.19-7.17 (m, 2H), 3.48-3.42 (m, 1H), 3.27-3.22 (m, 1H), 3.05-2.92 (m, 2H), 2.75-2.69 (m, 1H);  $^{13}\text{C}$  NMR (101 MHz,  $\text{CDCl}_3$ )  $\delta = 172.1$ , 168.6, 134.8, 128.2, 127.9, 126.6, 41.1, 35.0, 31.9. HRMS (ESI):  $[\text{M}+\text{H}^+]$  Calc. 191.0708, found 191.0701.

#### IV. Reference

1. (a) Z. Y. Han, P. Li, Z. Zhang, C. Chen, Q. Wang, X. Q. Dong, X. Zhang, *ACS Catal.* 2016, **6**, 6214–6218. (b) Y. Chen, K. Tsao, J.W. Keillor, *J. Org. Chem.* 2015, **80**, 12182–12192.
2. (a) B. Maurizio, M. Marc-Andre, P. Andreas, *Angew. Chem. Int. Ed.* 2014, **53**, 5385–5388. (b) L. F. Julio, K. Achim, S. Peter, W. Hubert, H. G. Lutz, *Chem.-Eur. J.* 2011, **17**, 14047–14062.
3. G. M. Strunz, C. M. Yu, L. Ya, *Canadian Journal of Chemistry*, 1990, **68**(5), 782-6.

## V. NMR Spectra

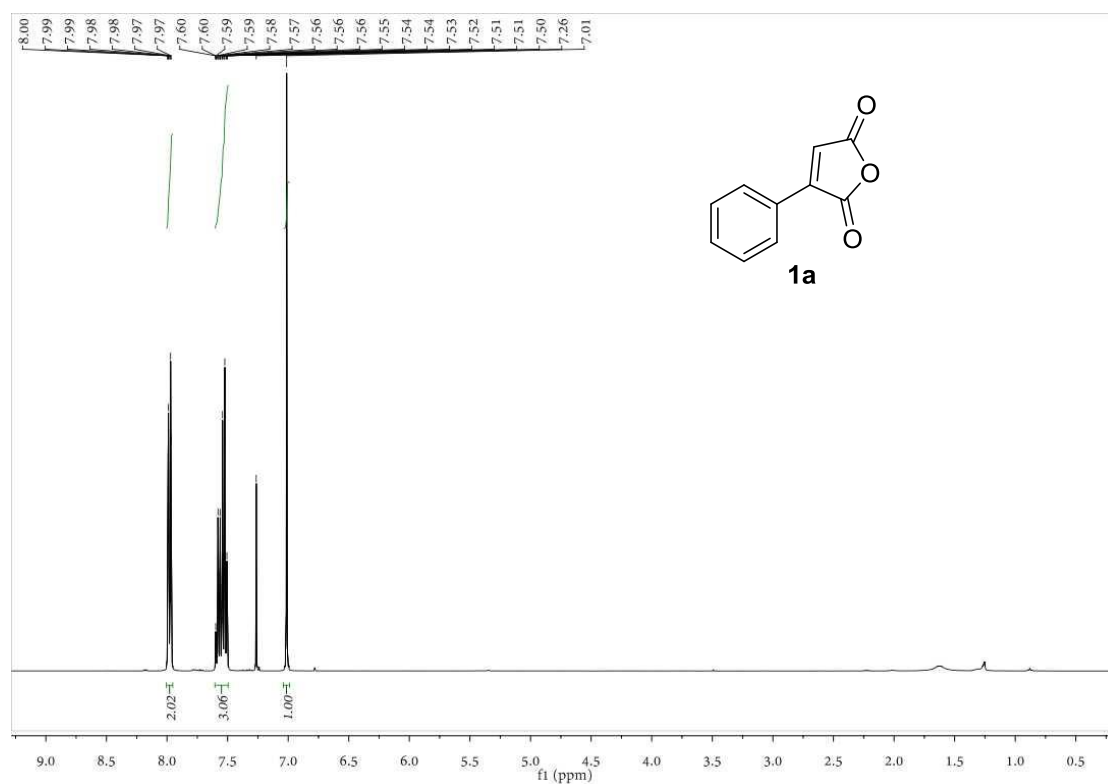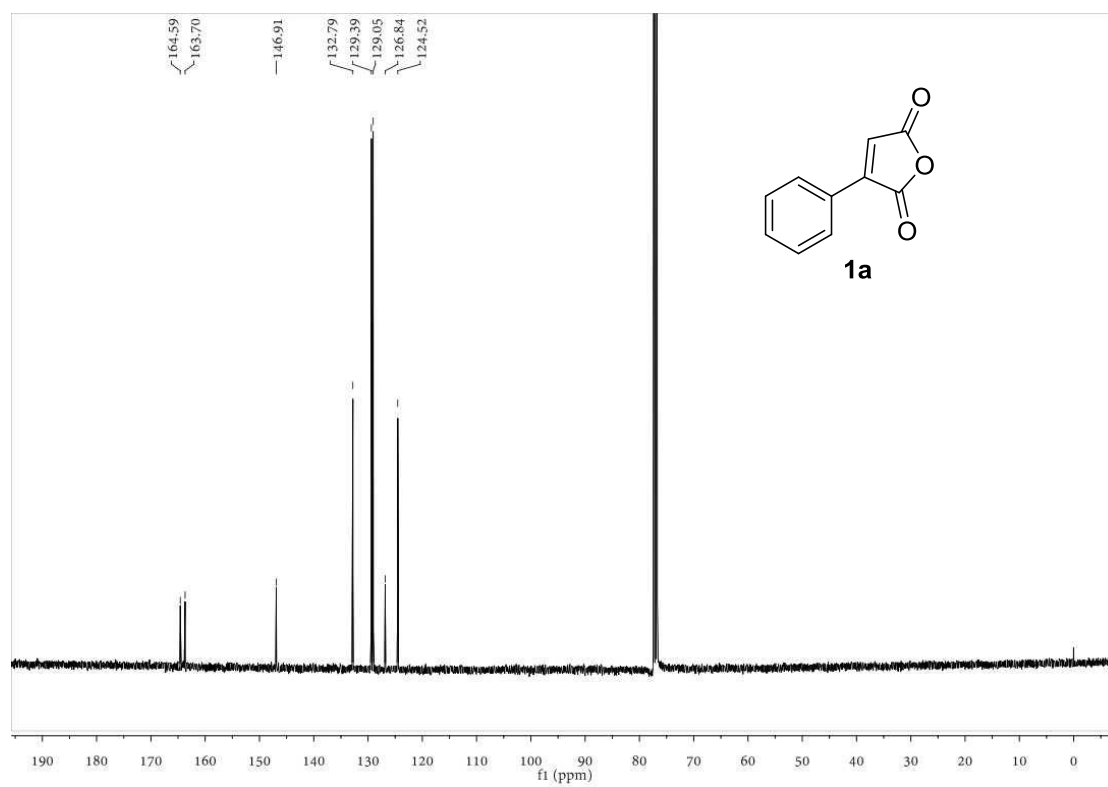

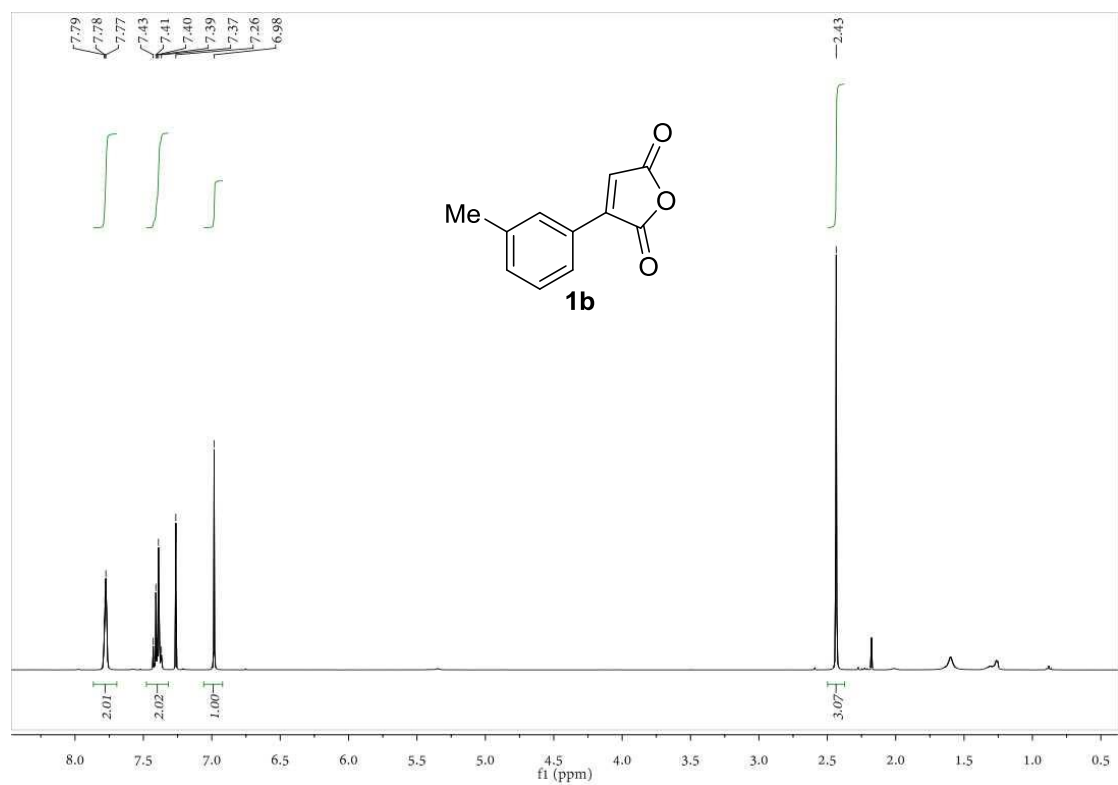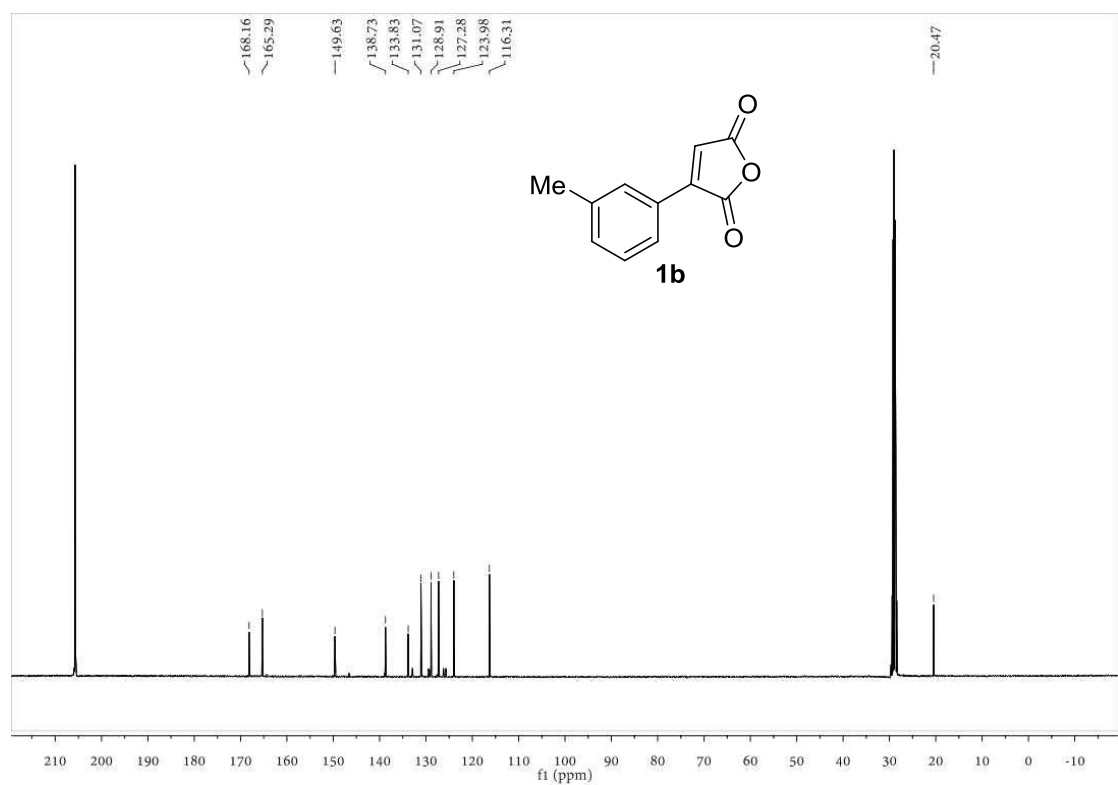

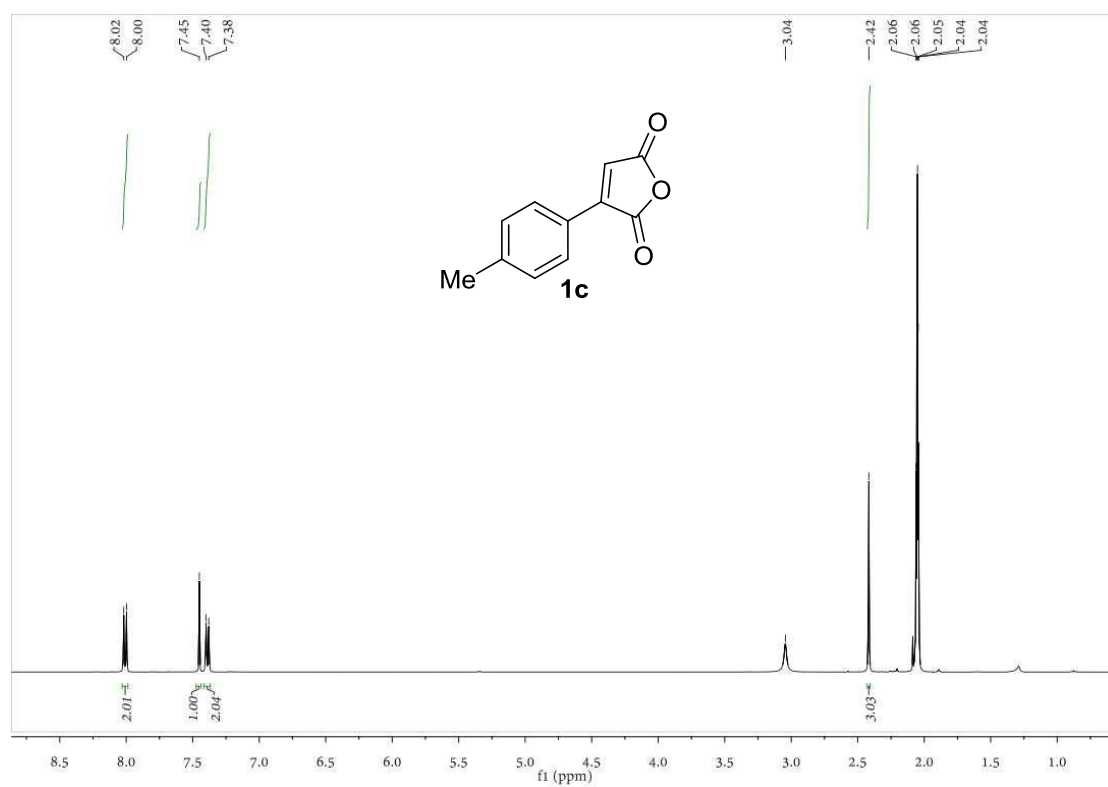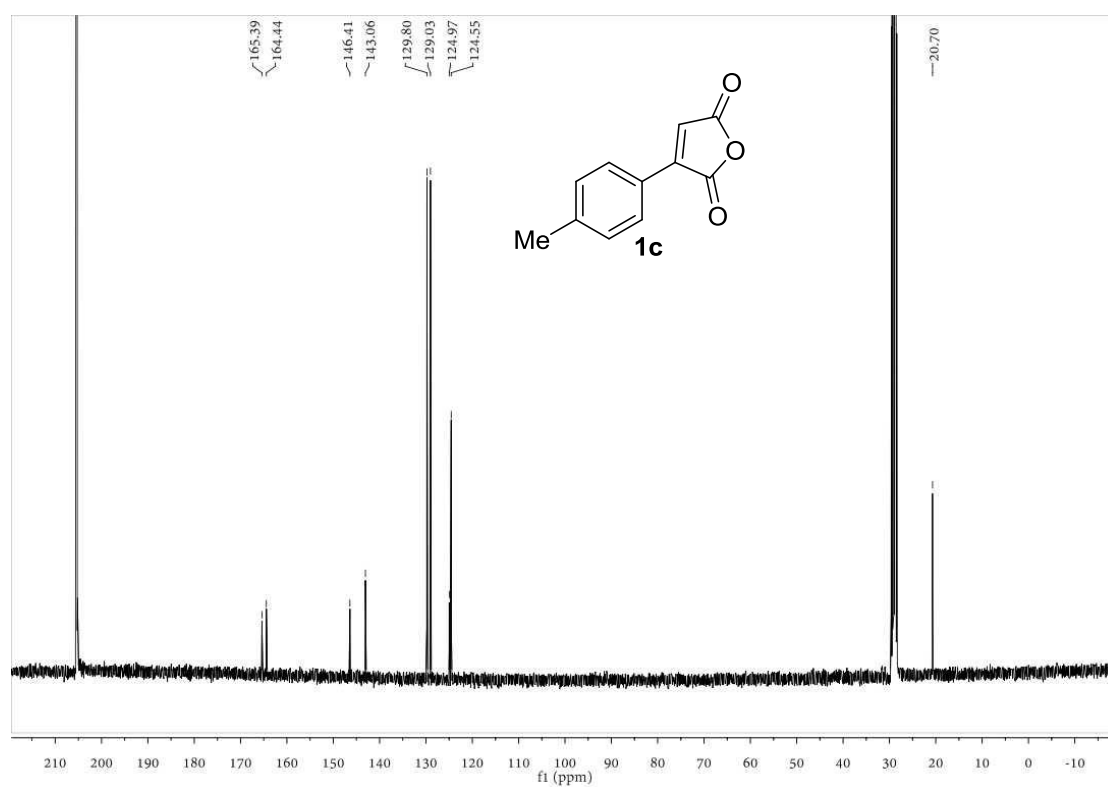



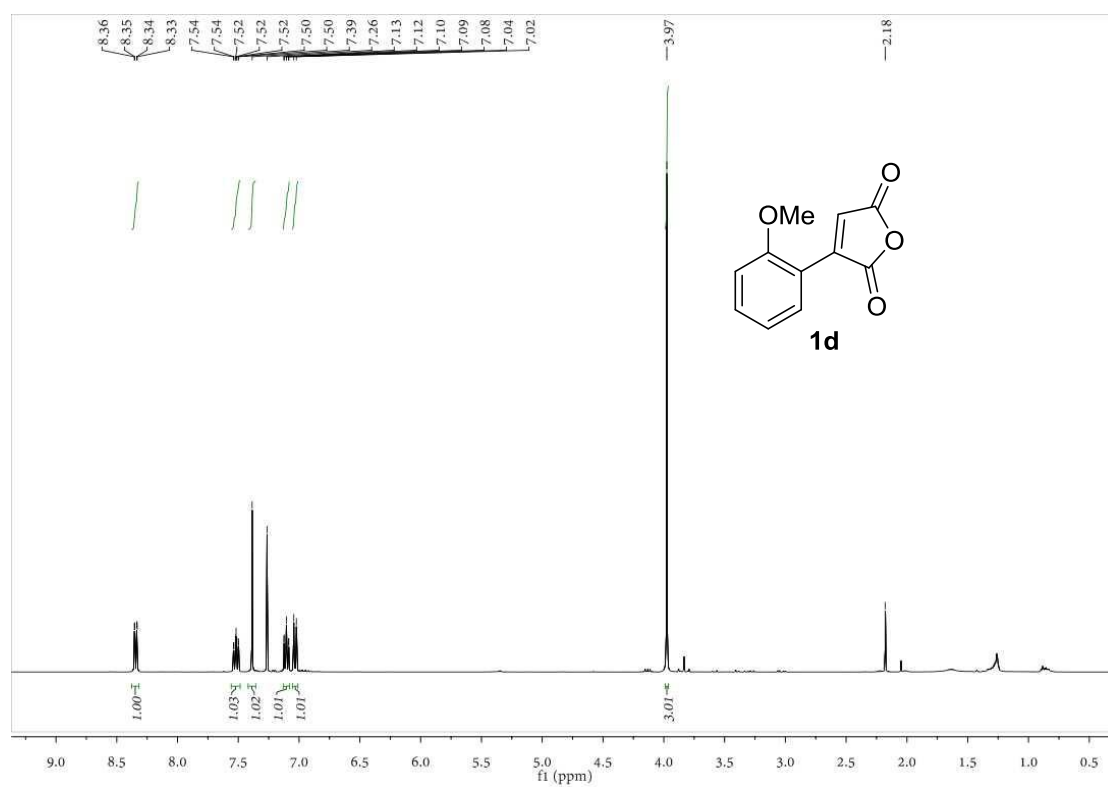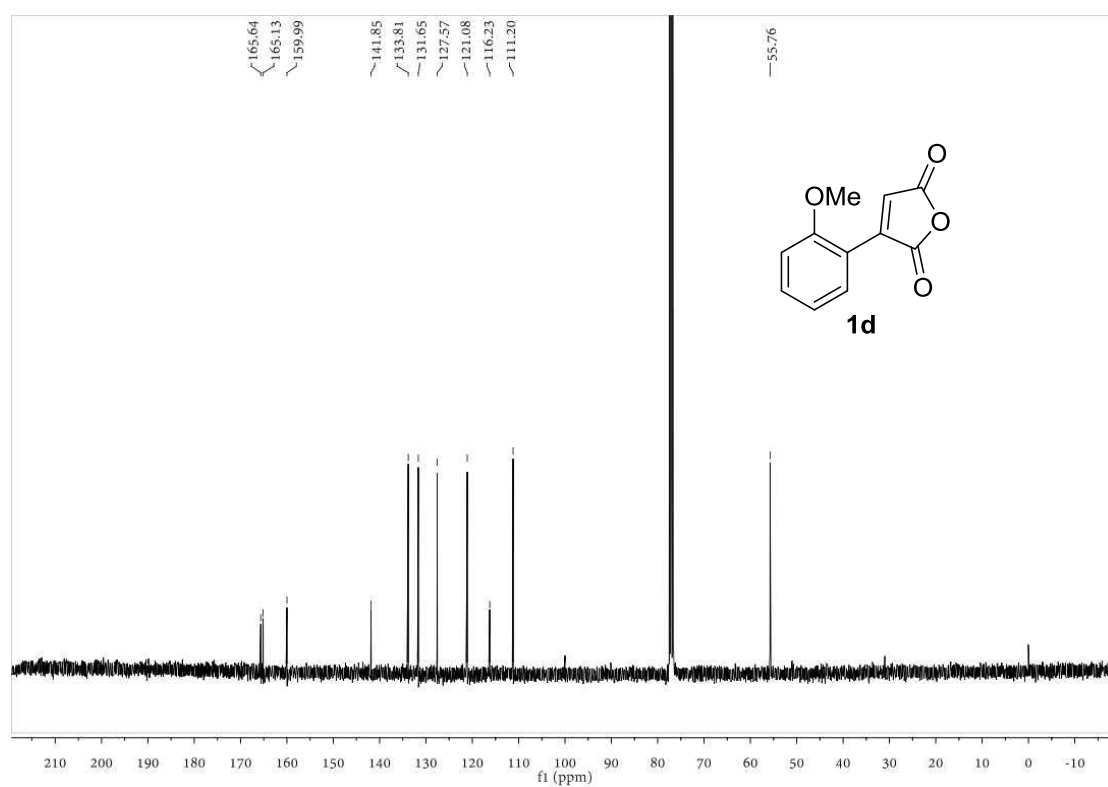

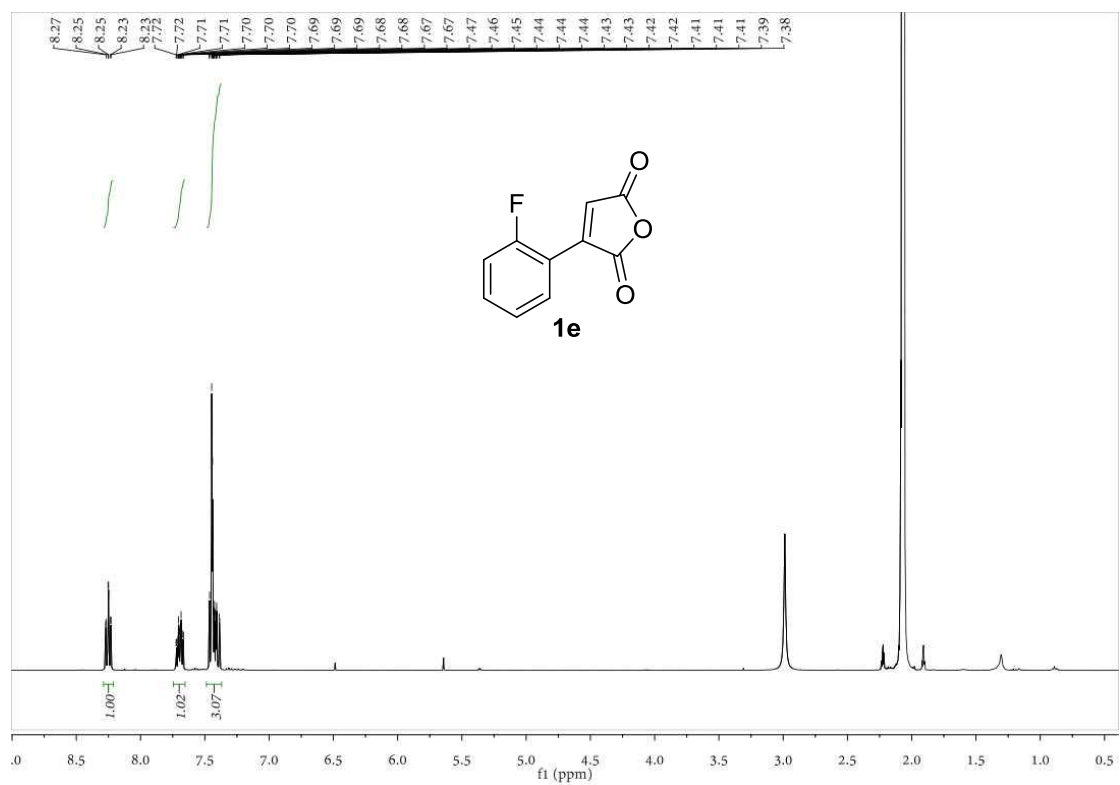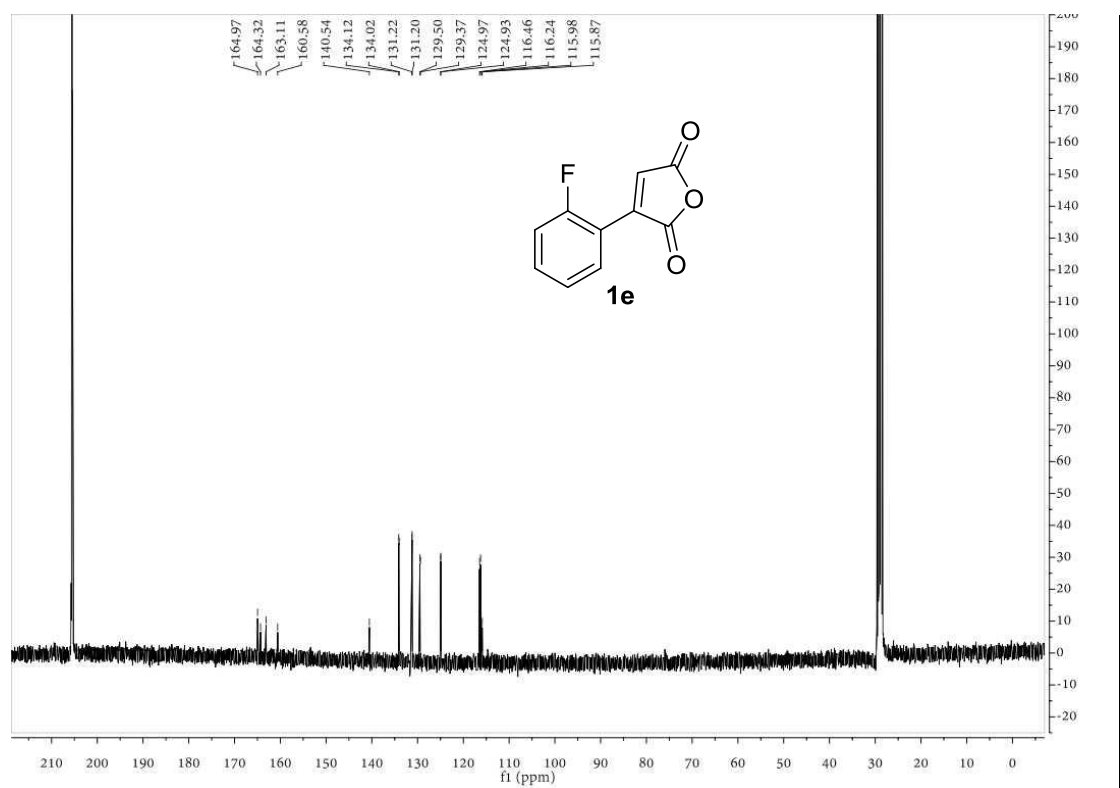

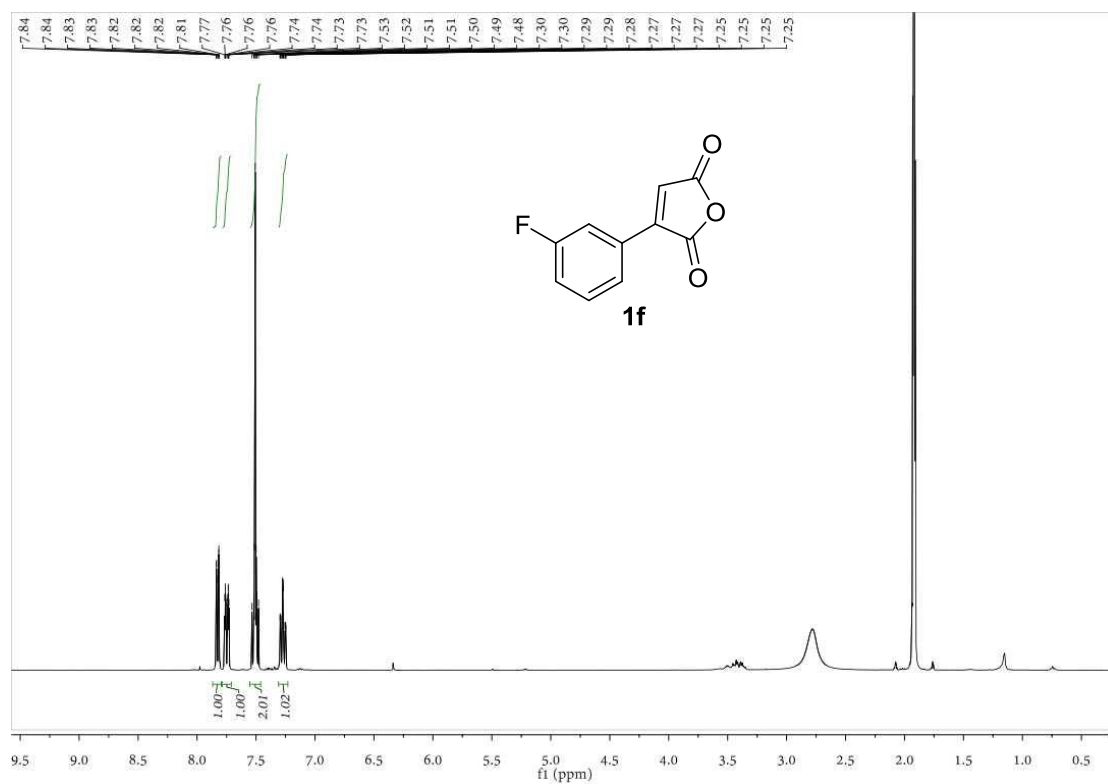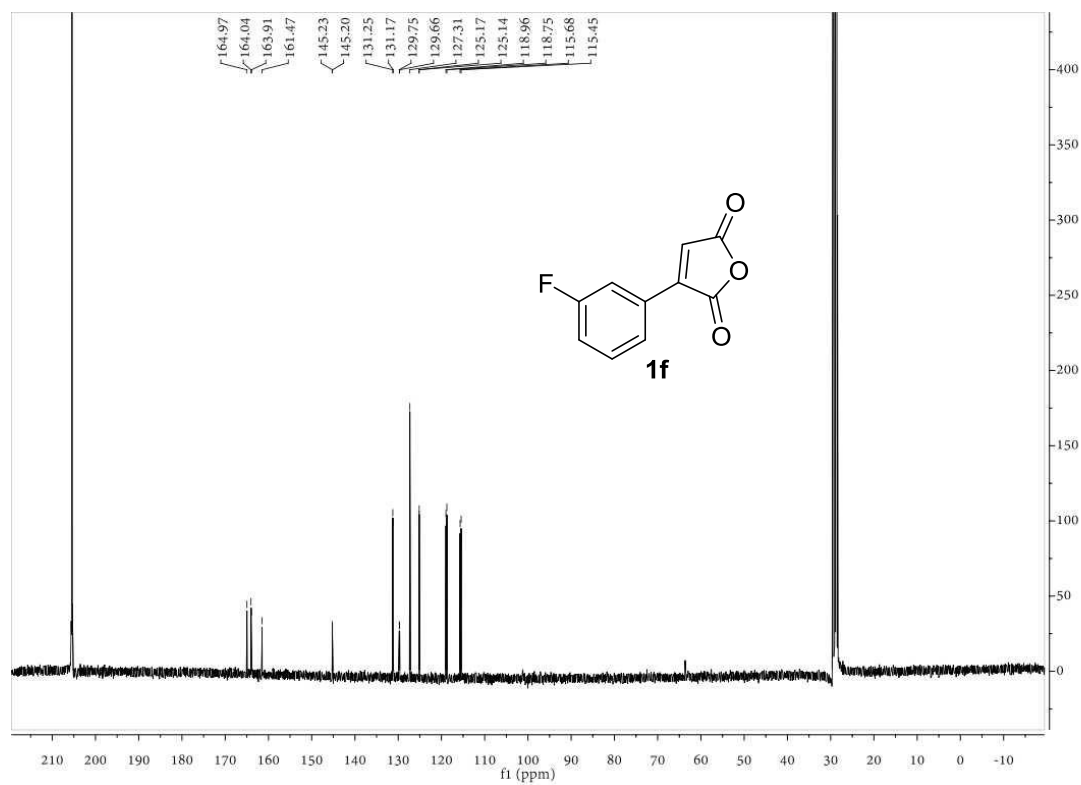

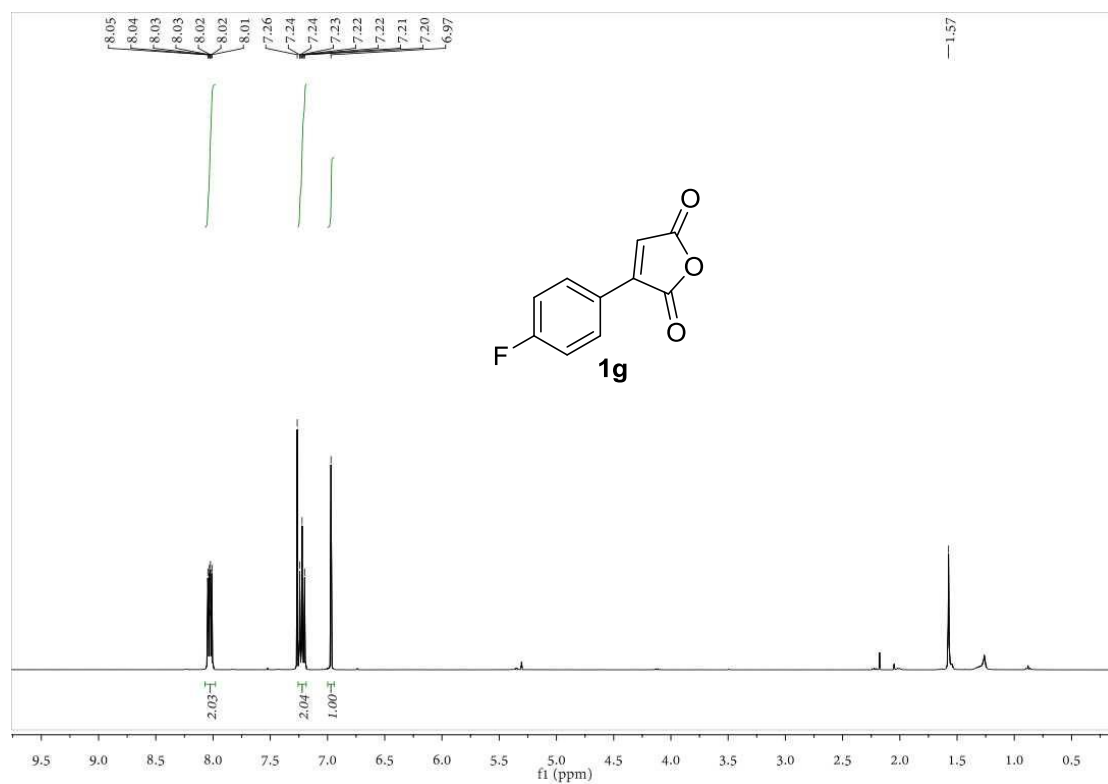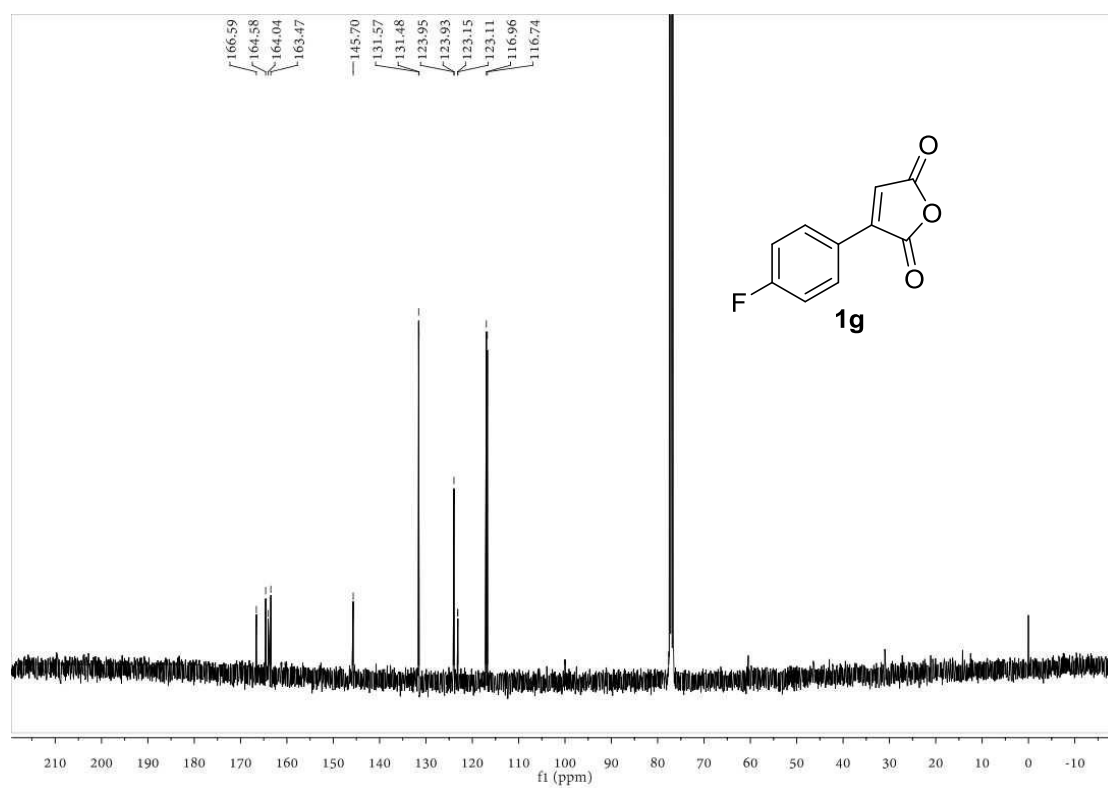

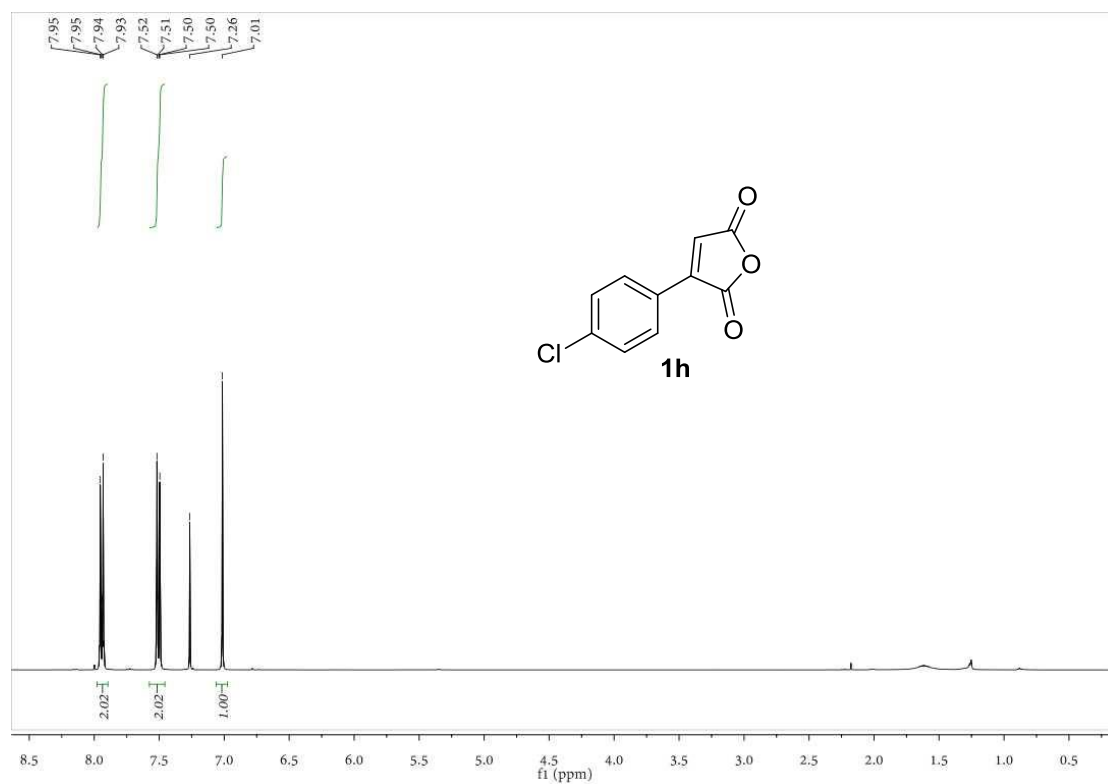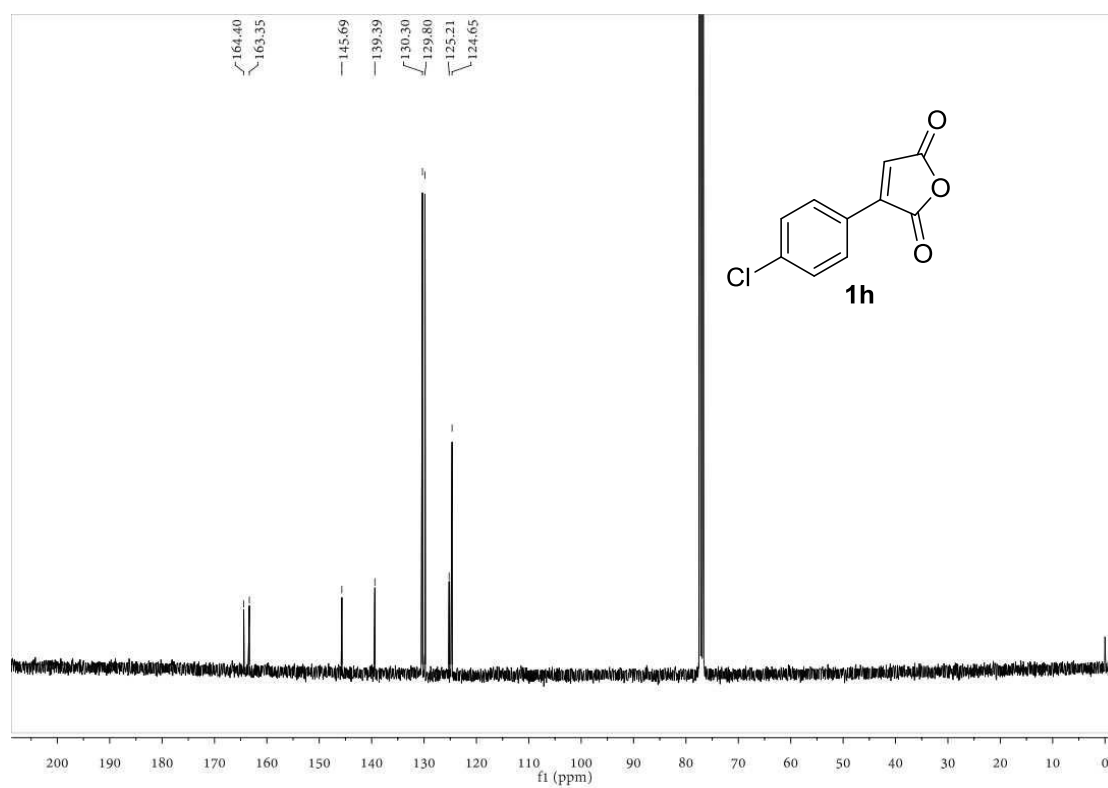

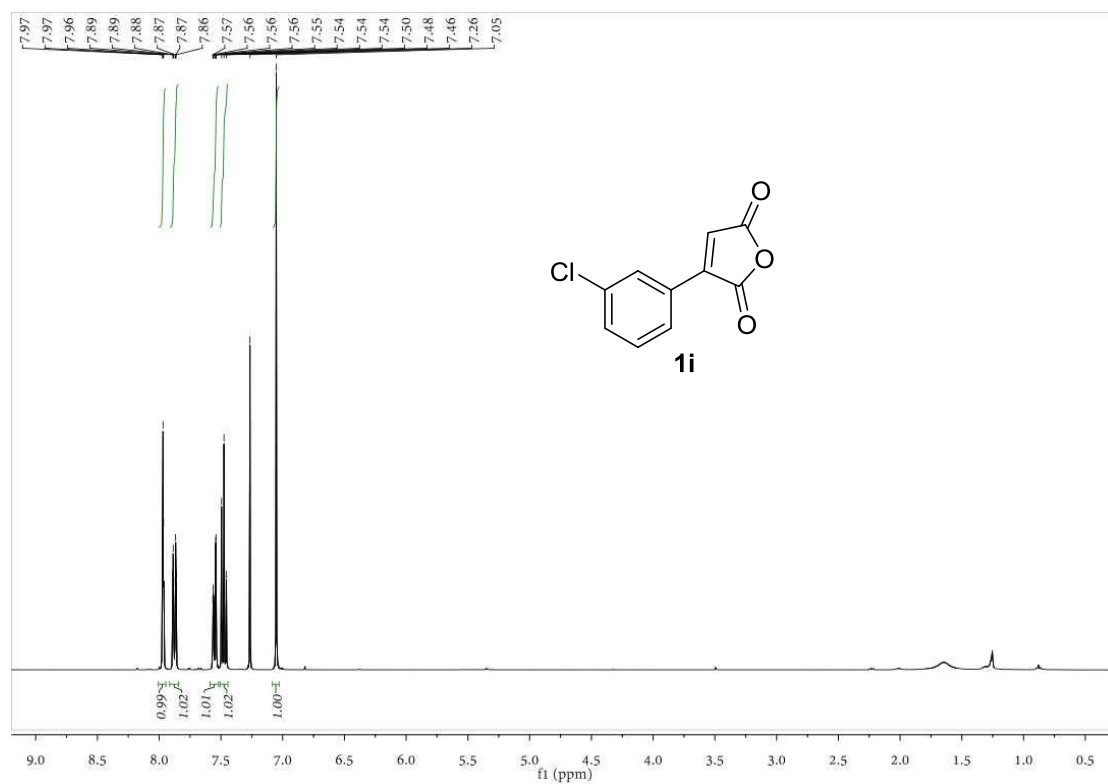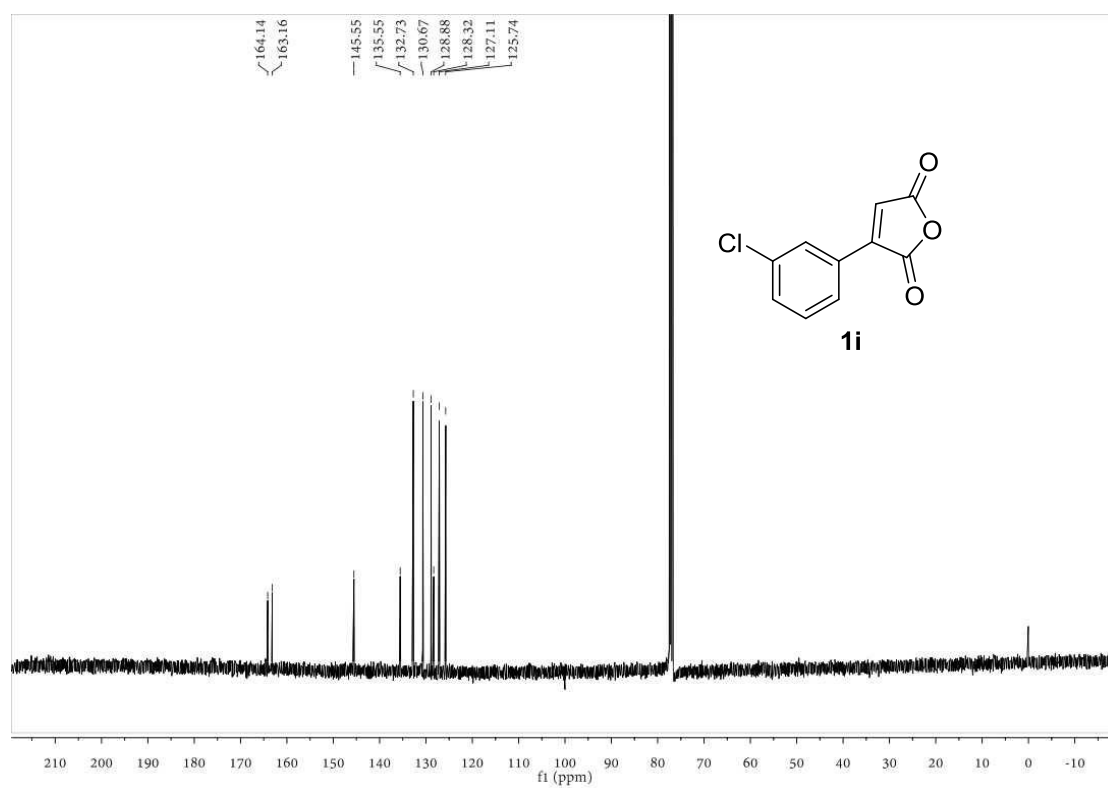

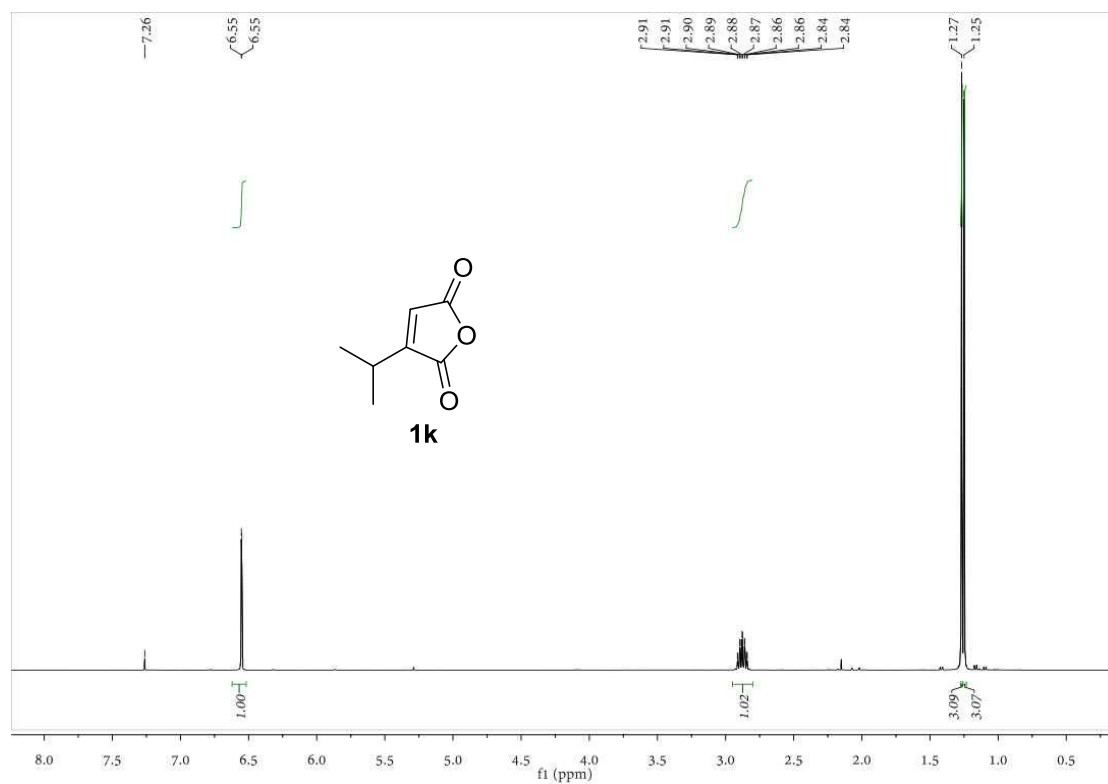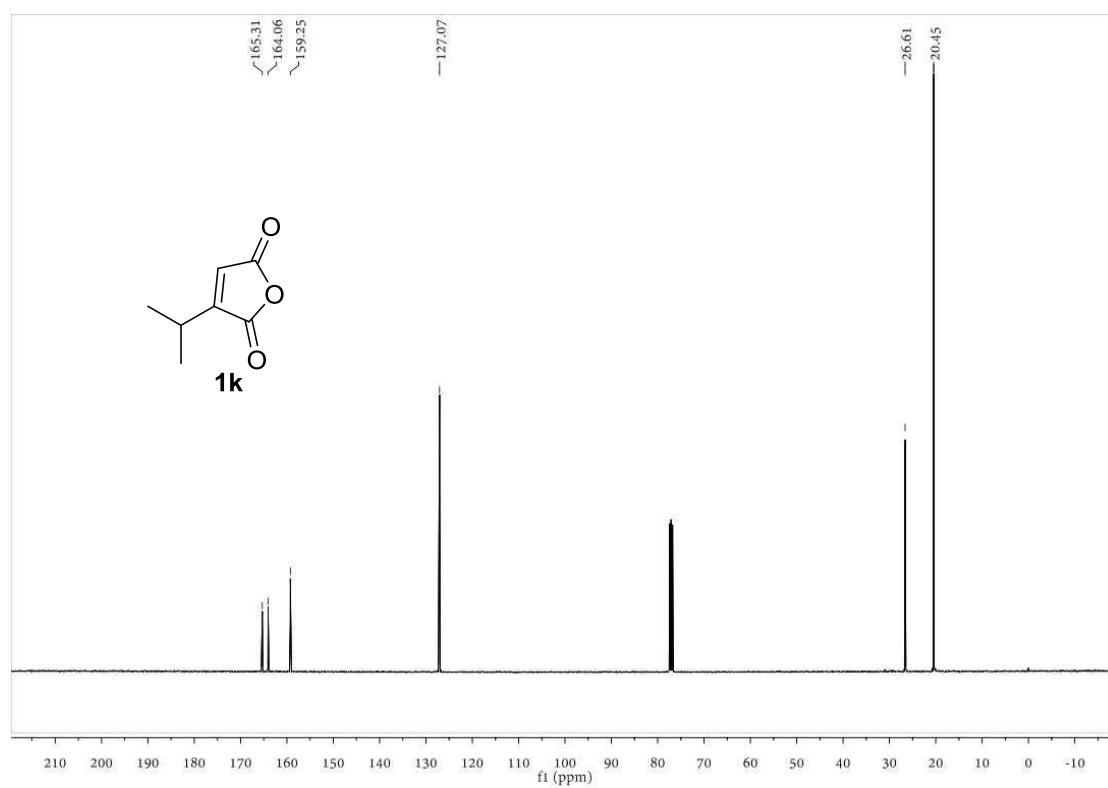

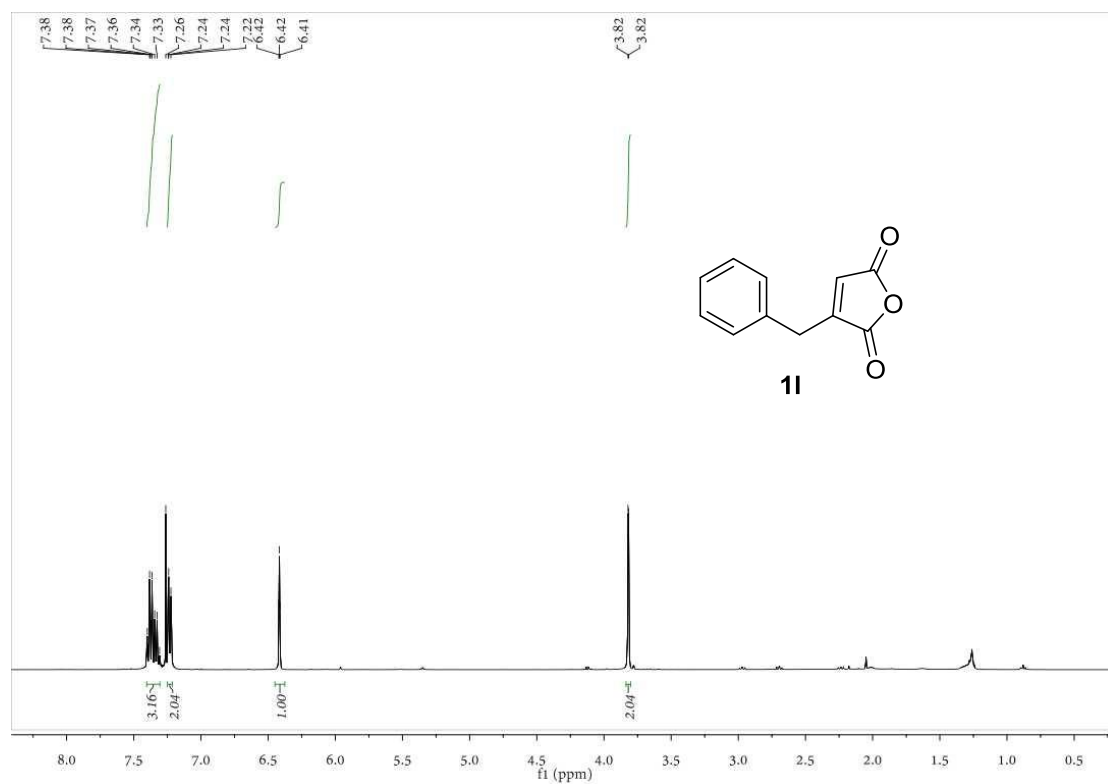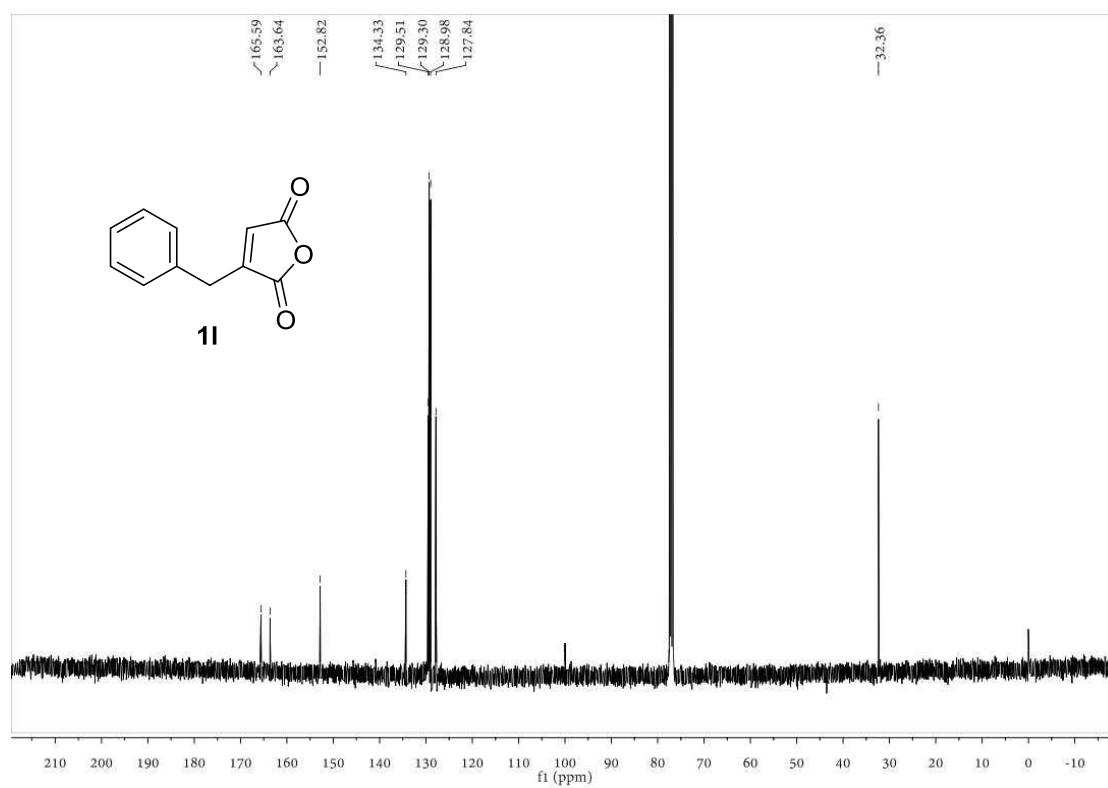



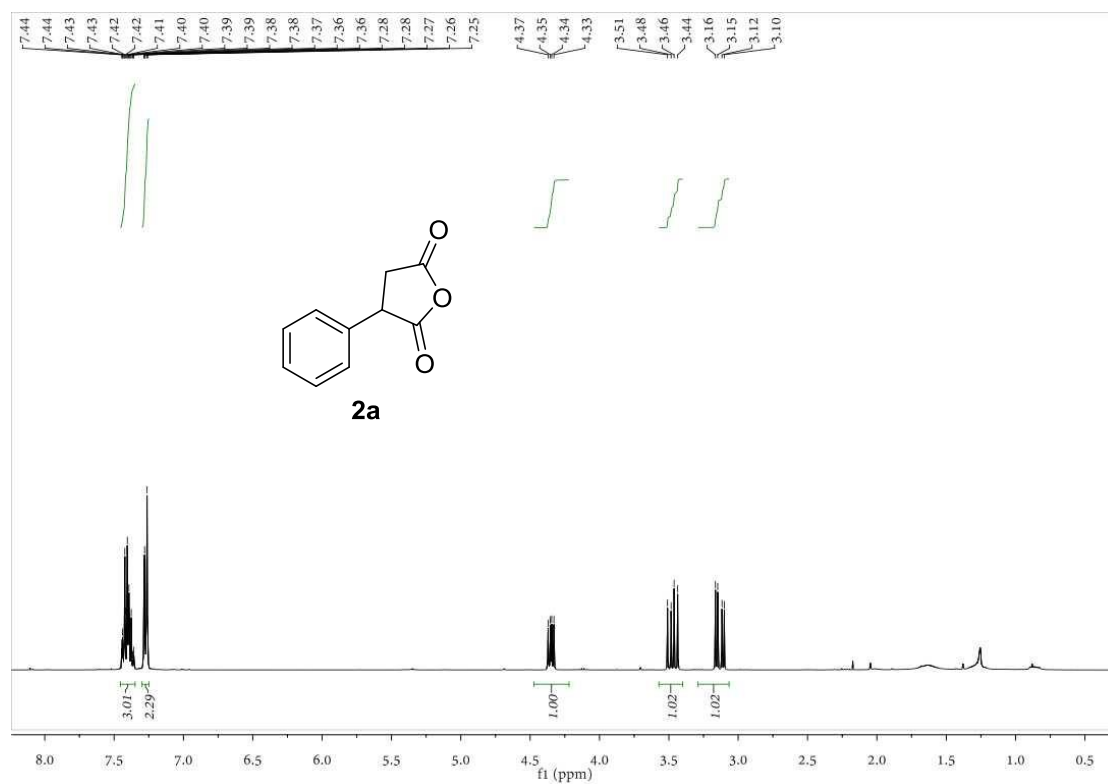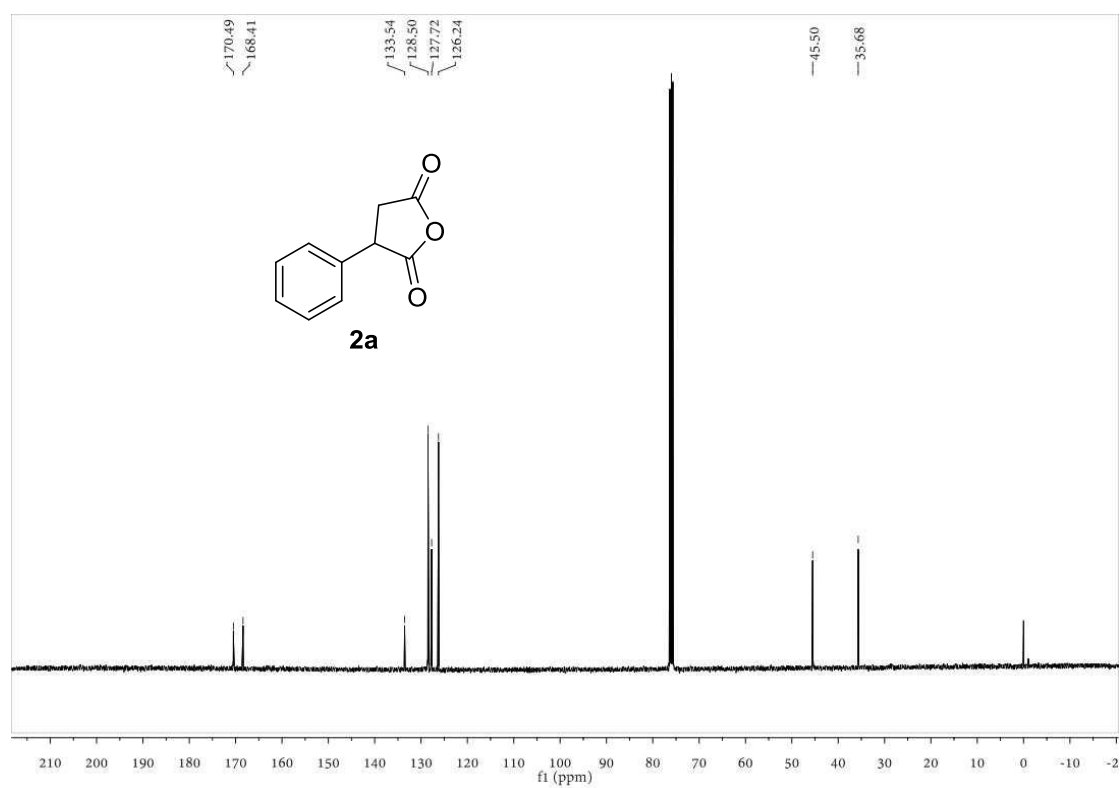

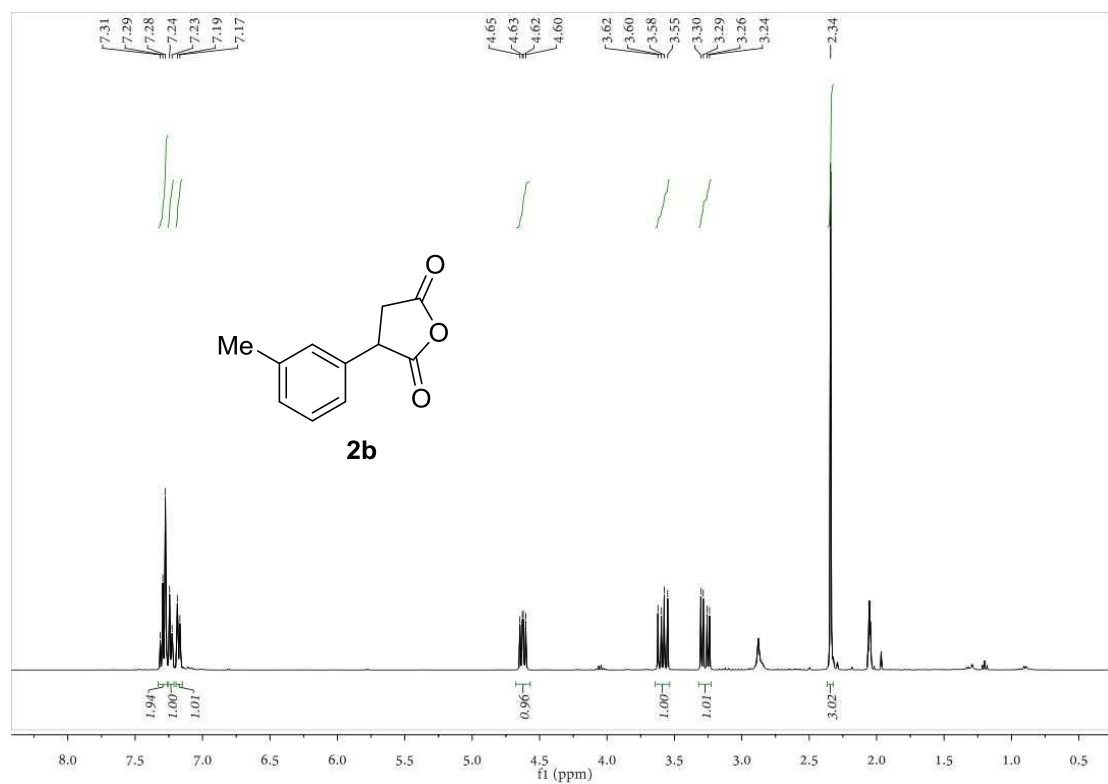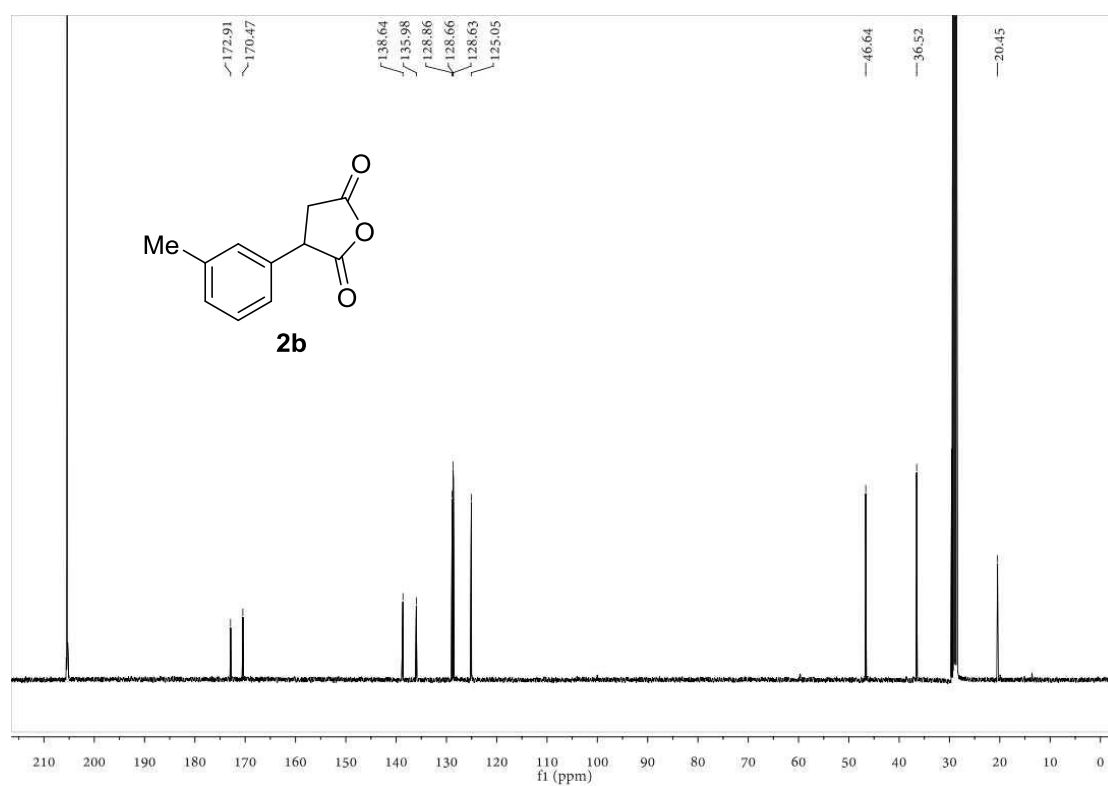

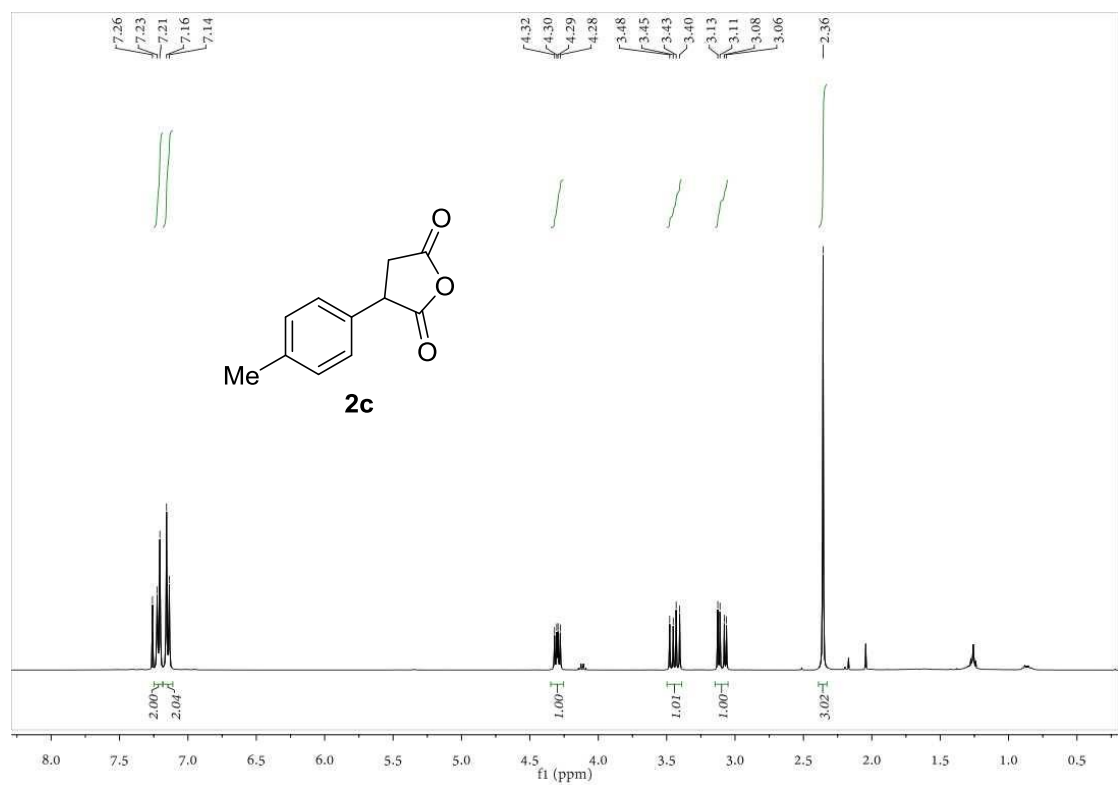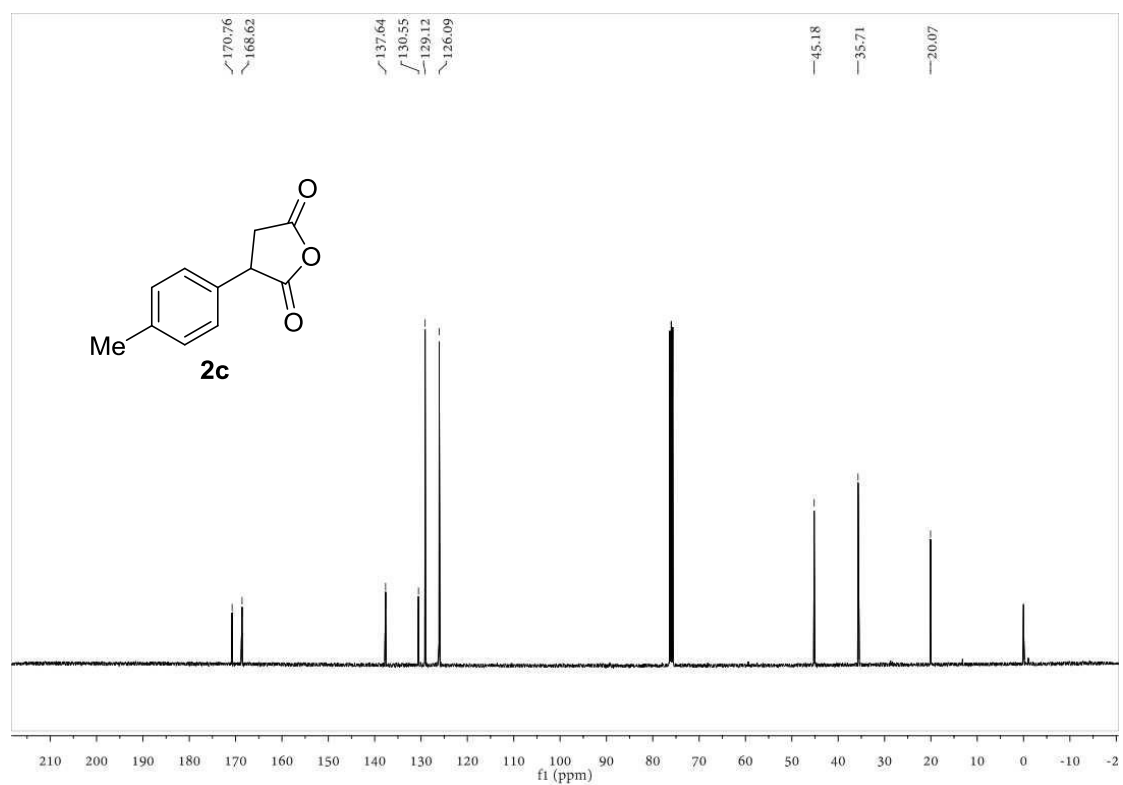

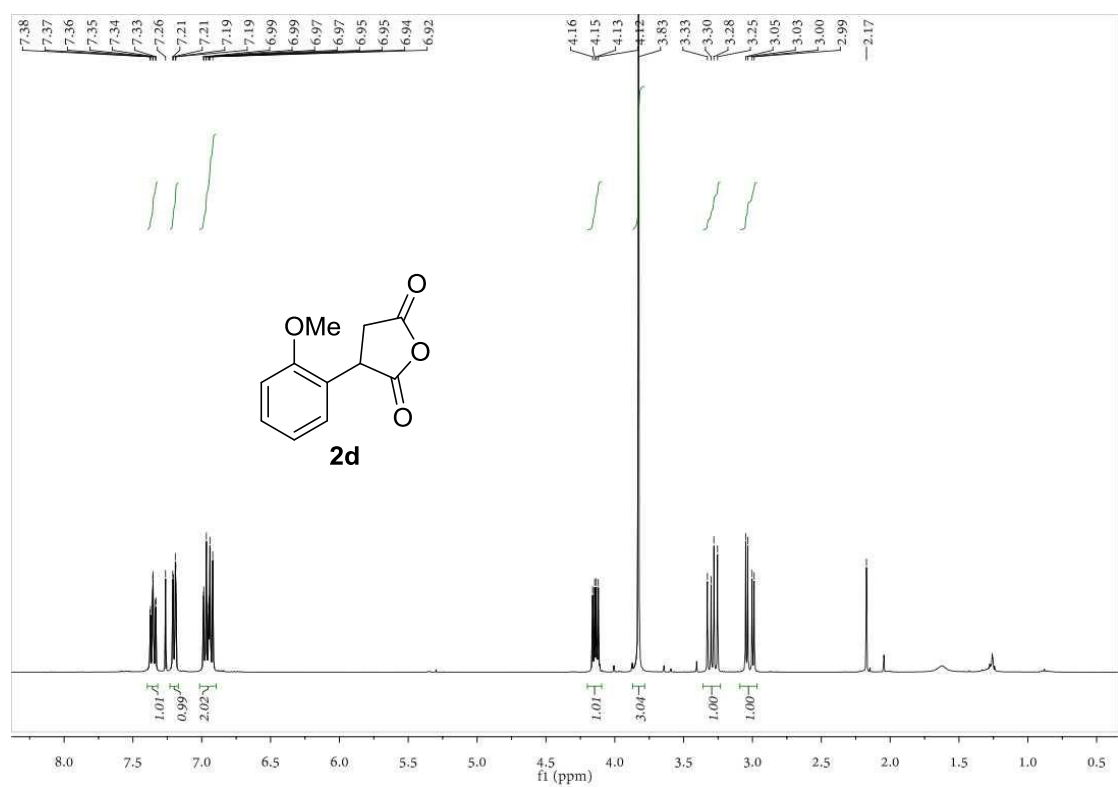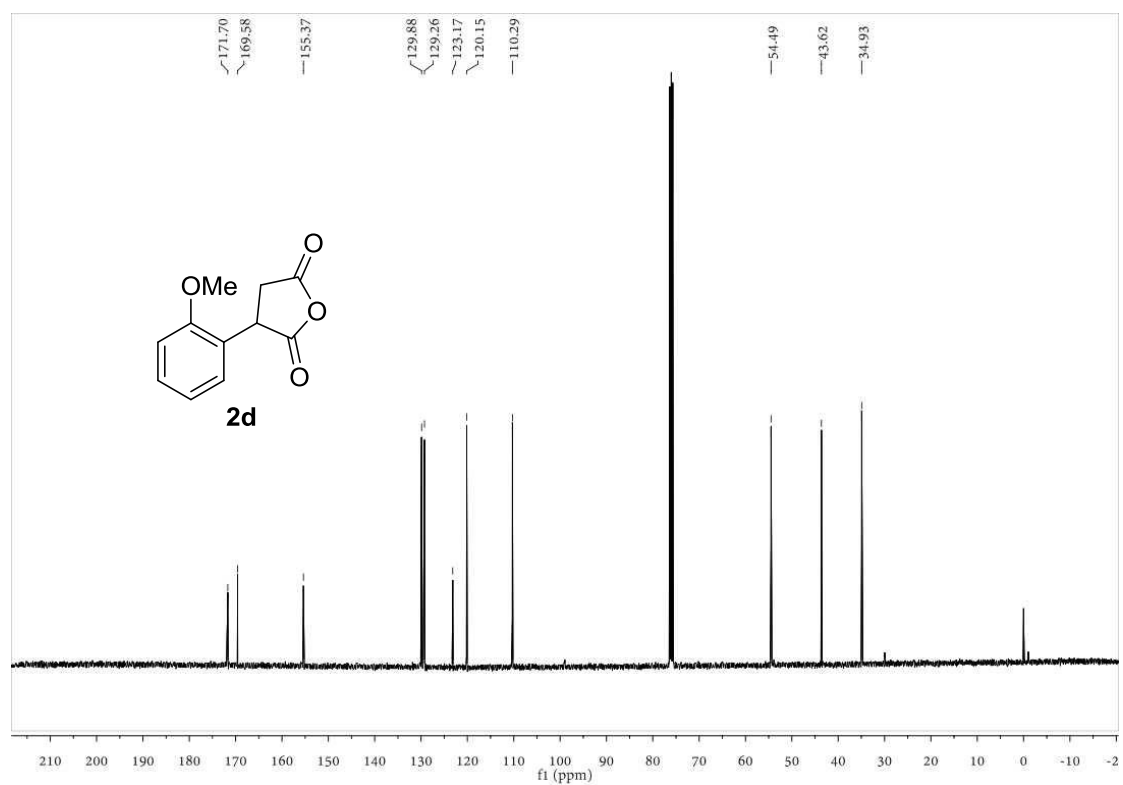

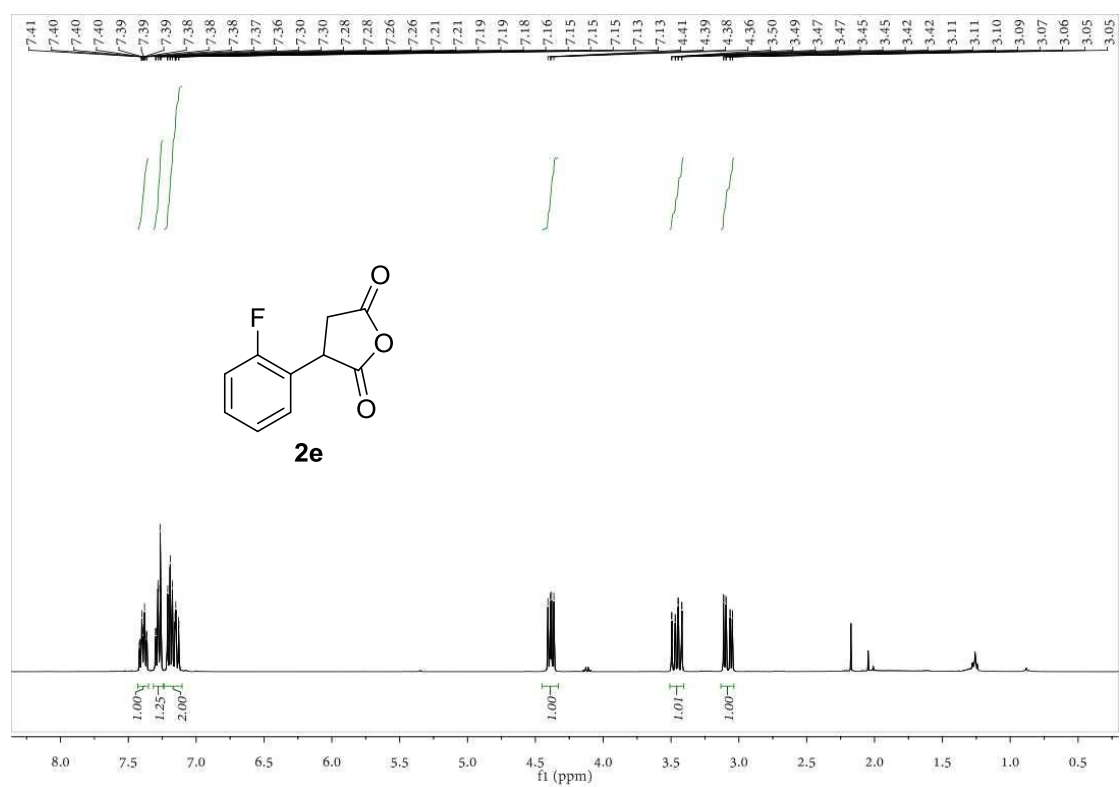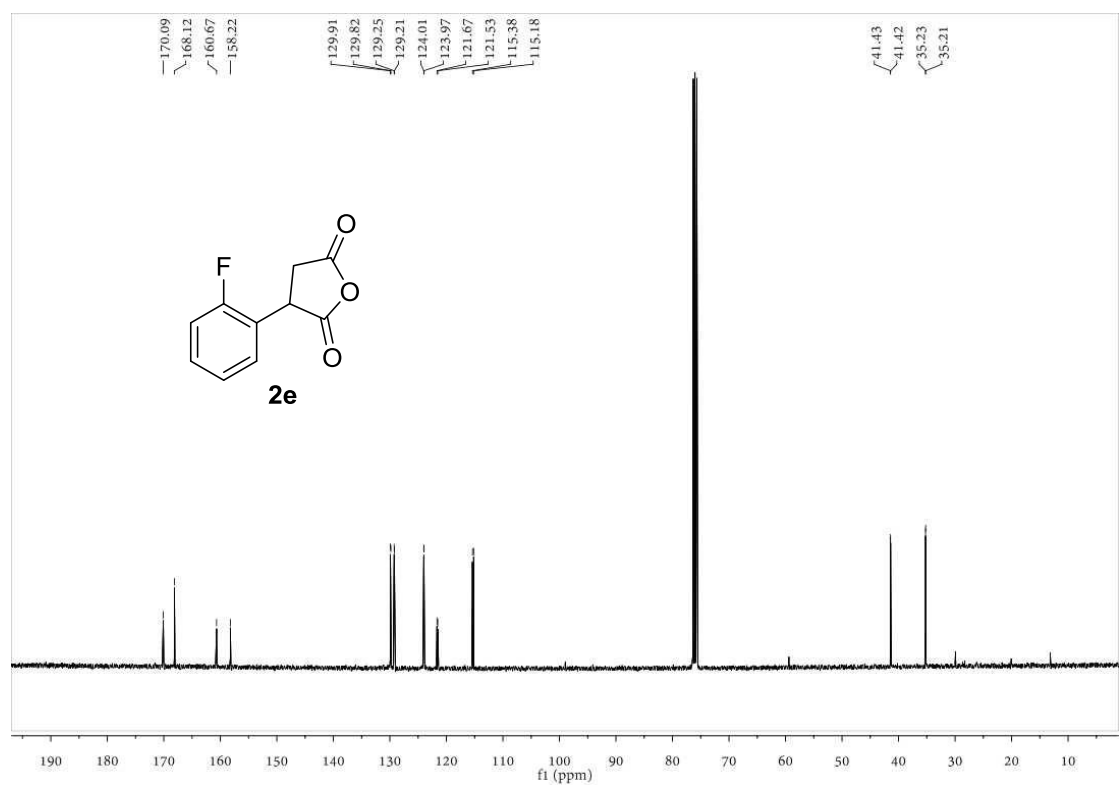

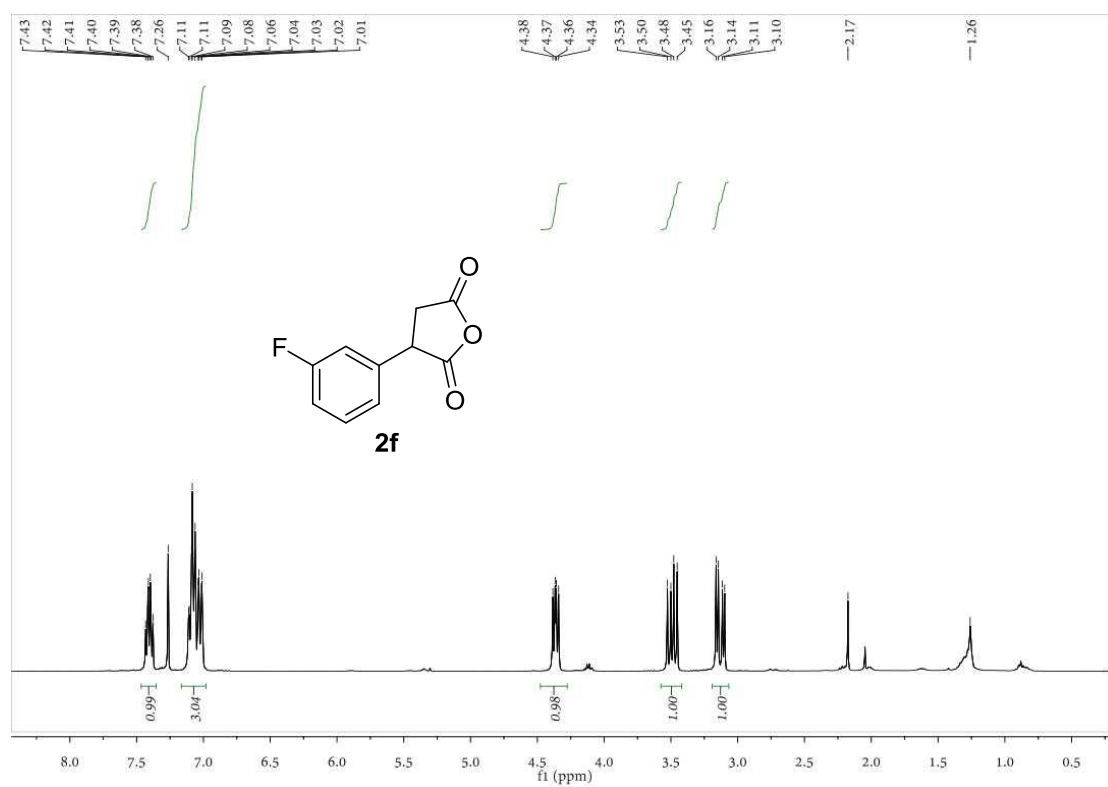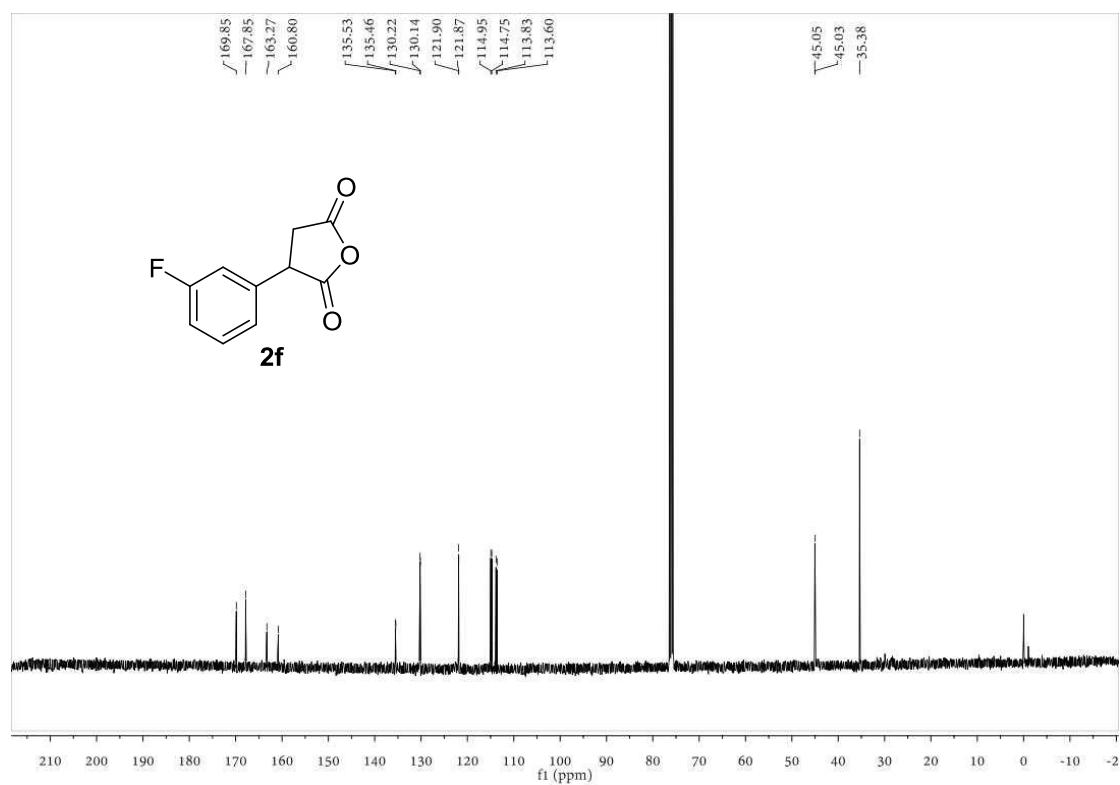

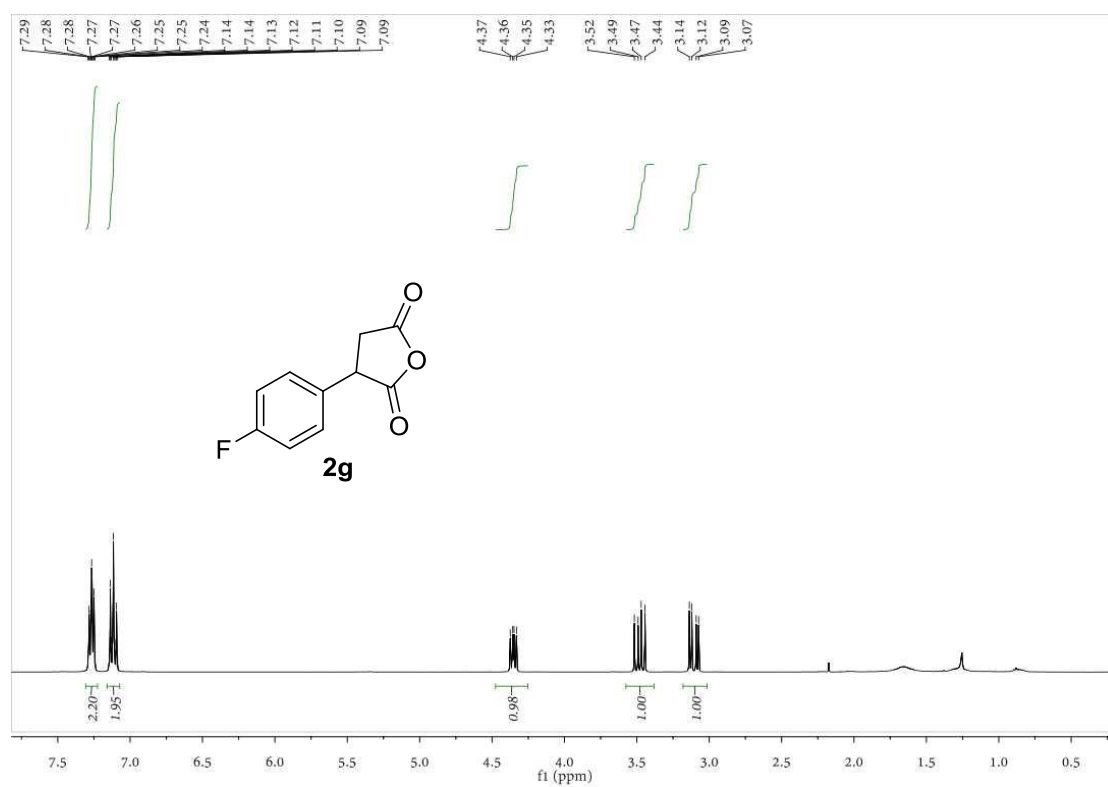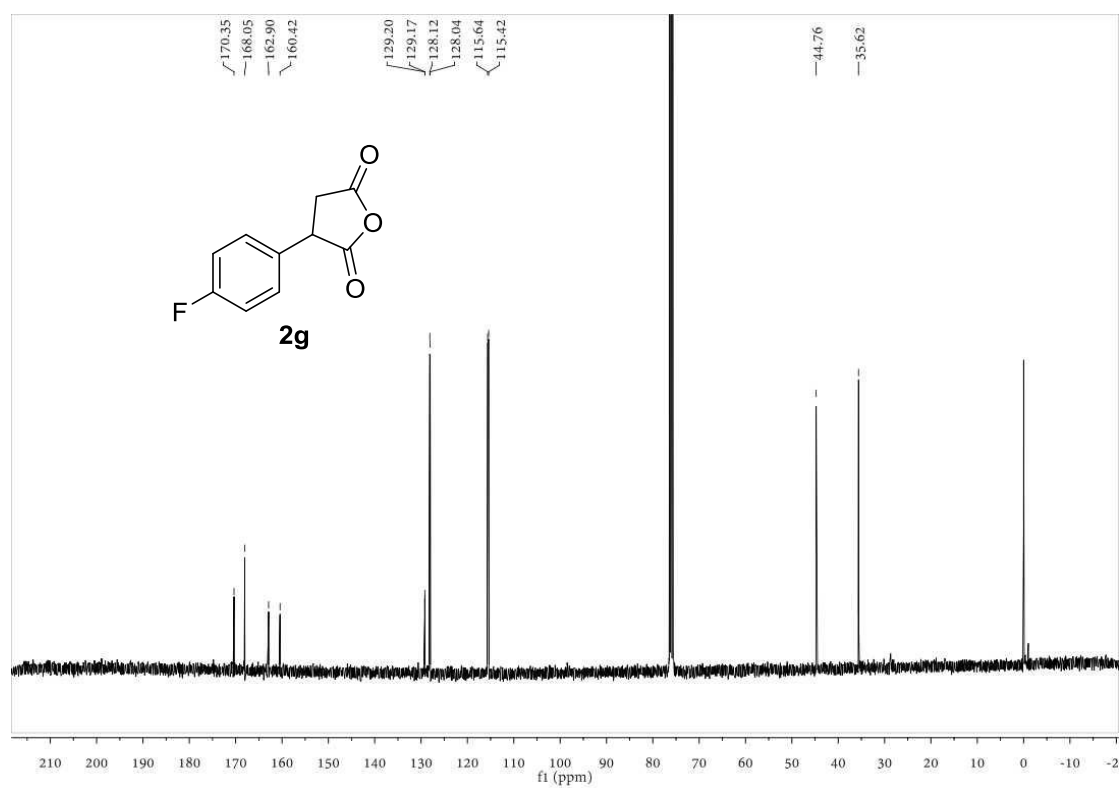

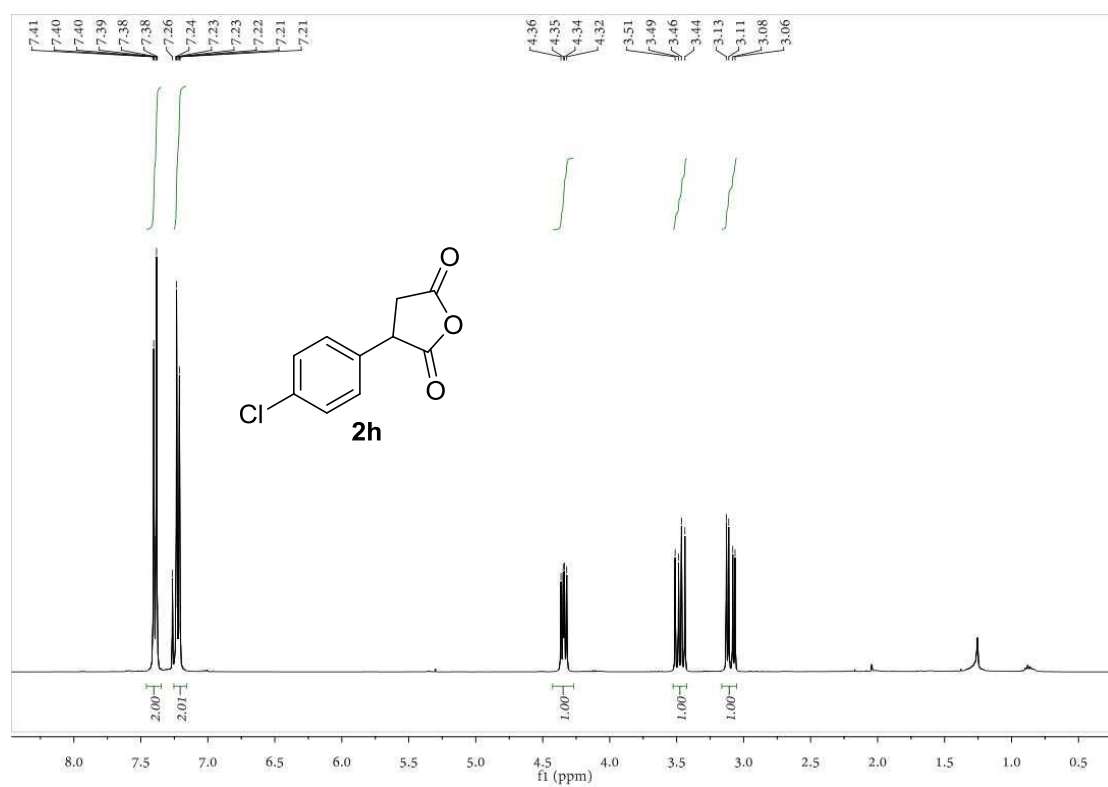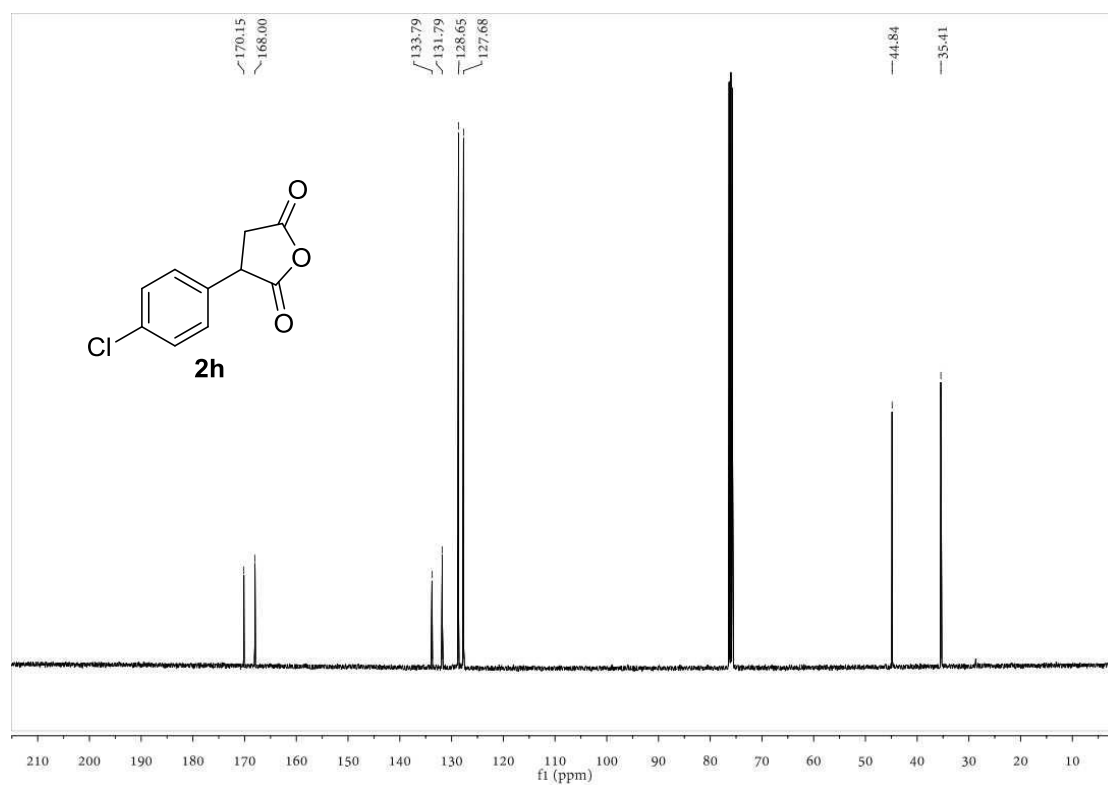



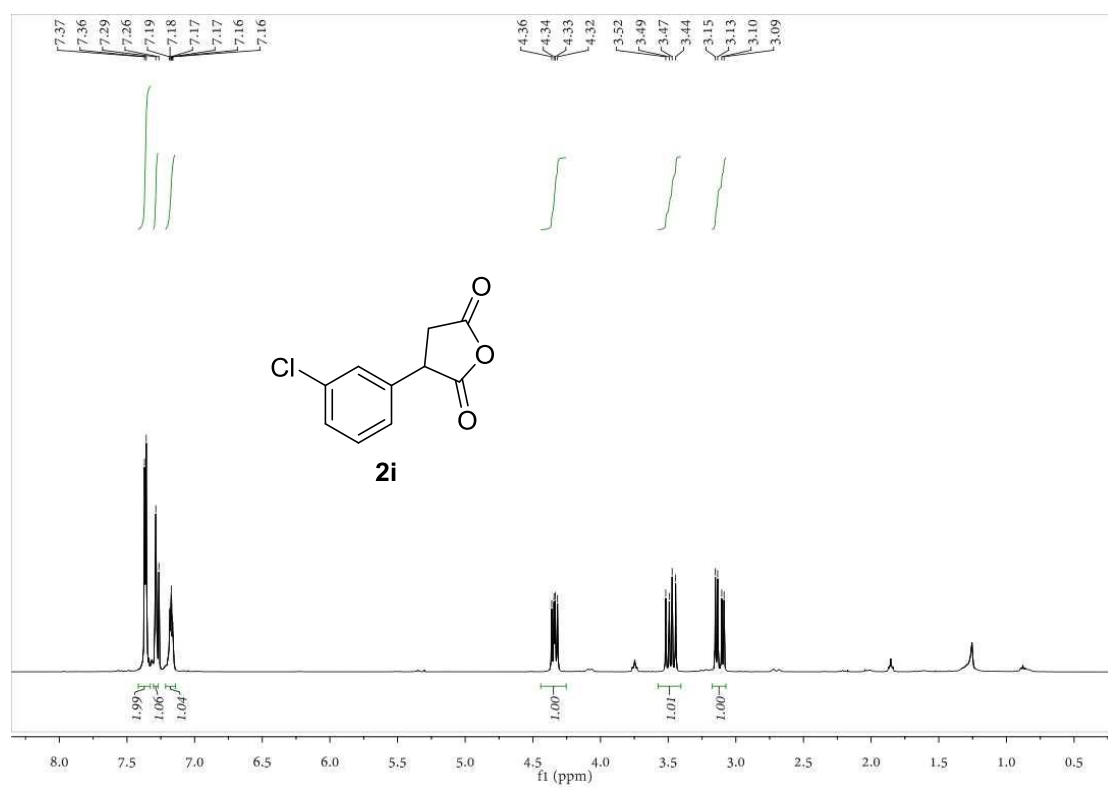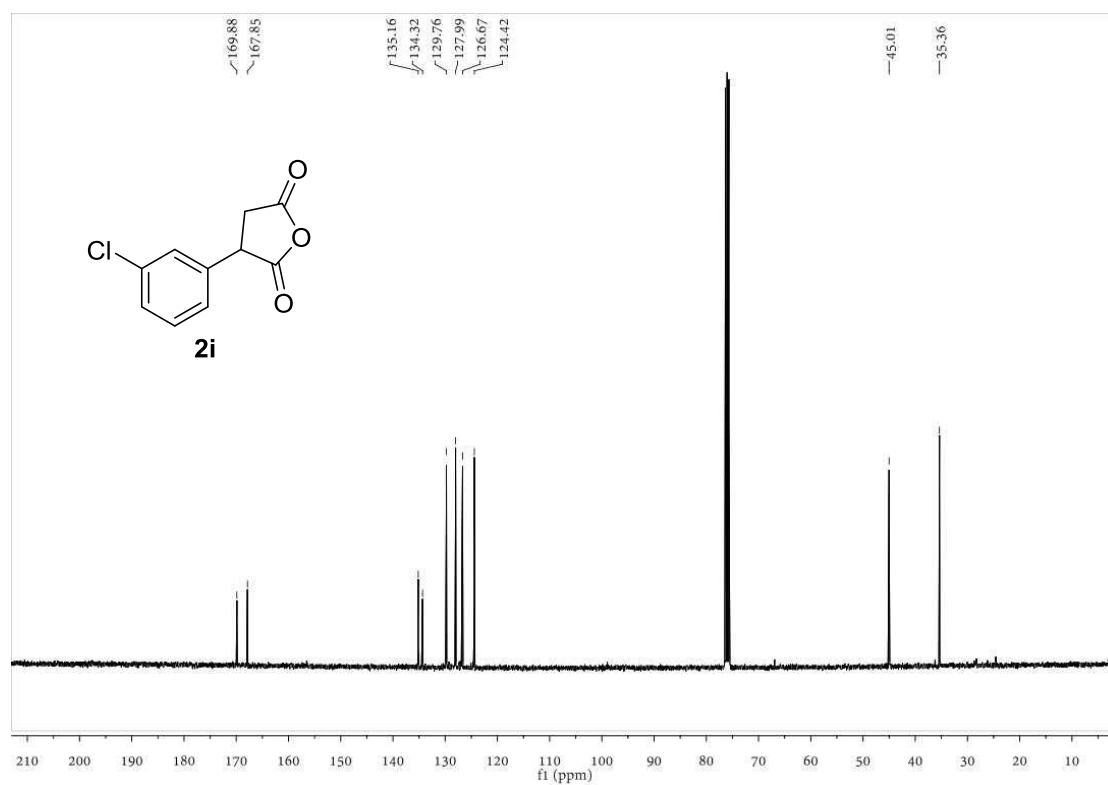

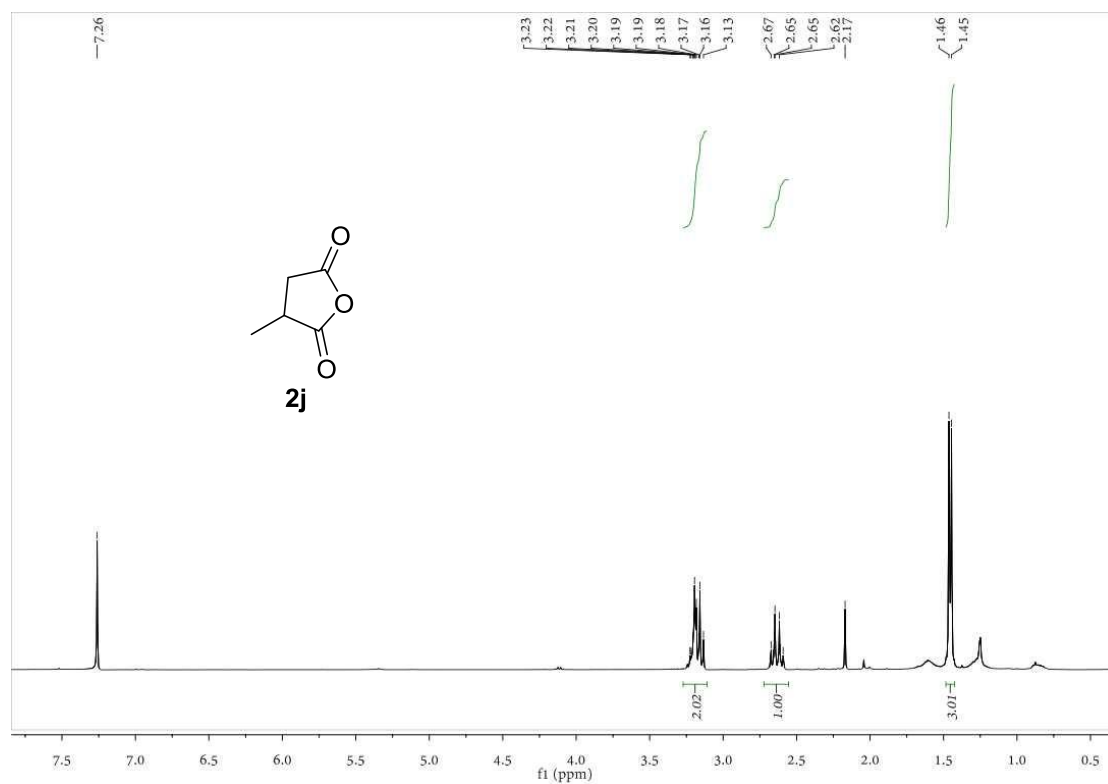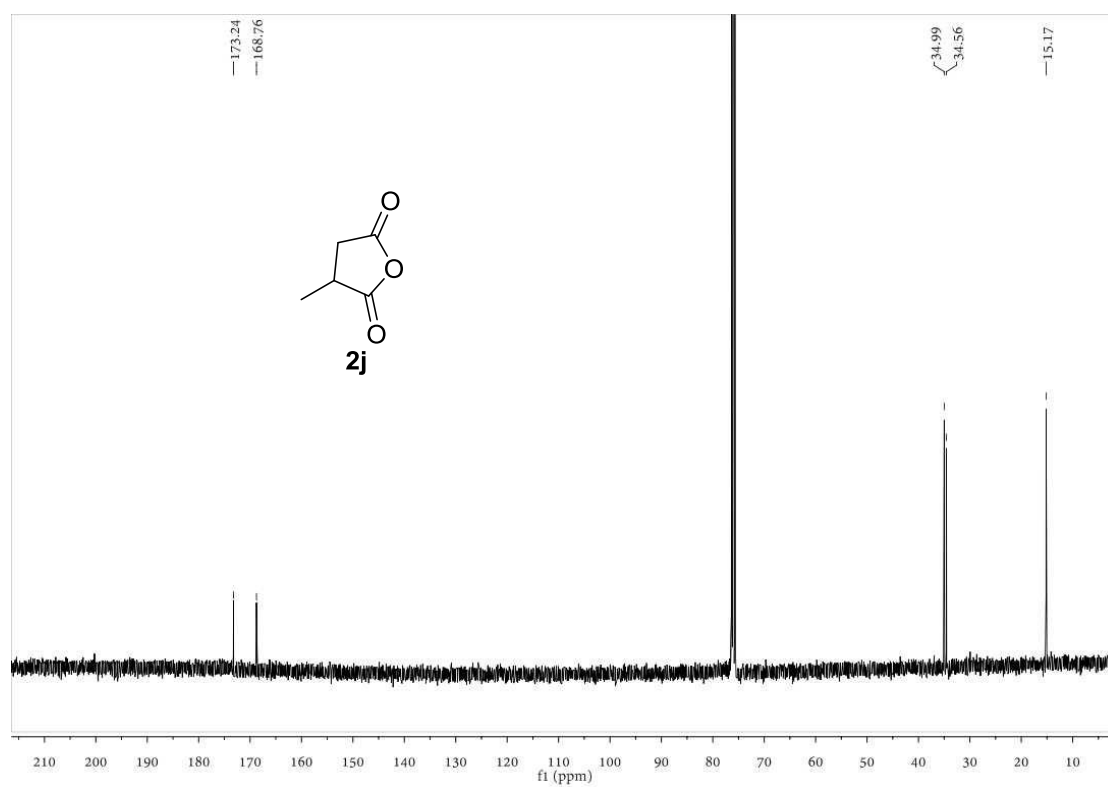

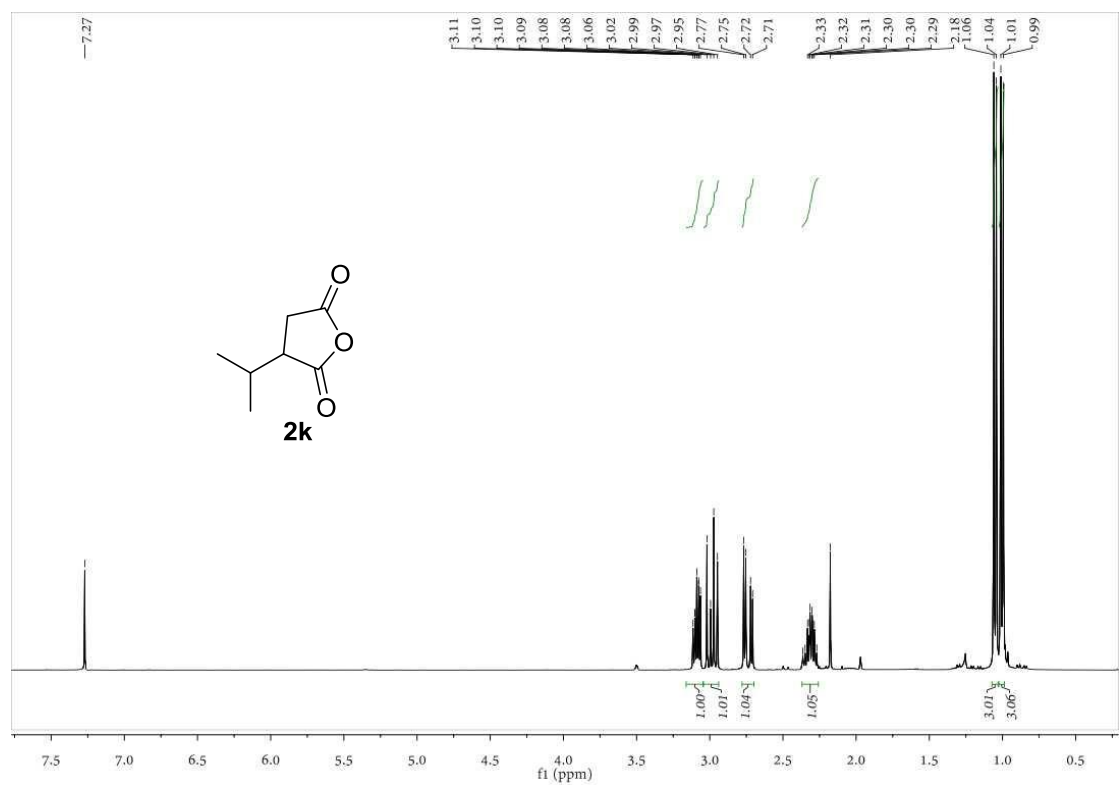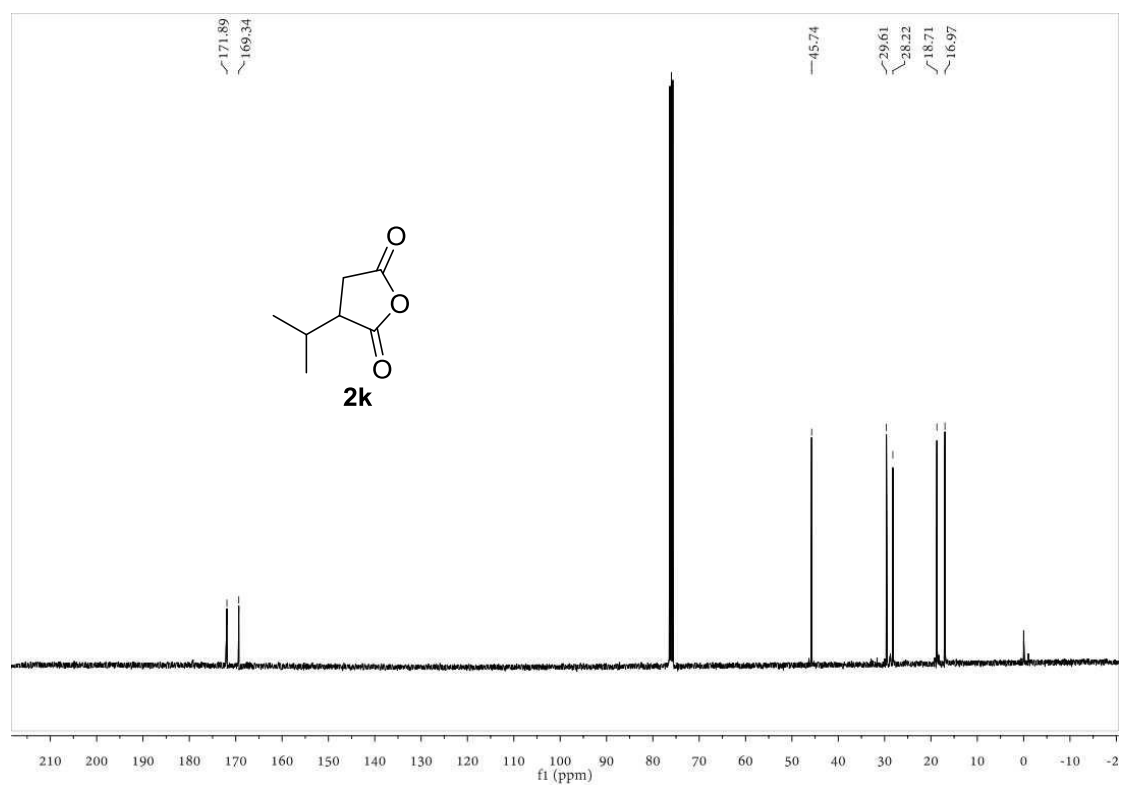

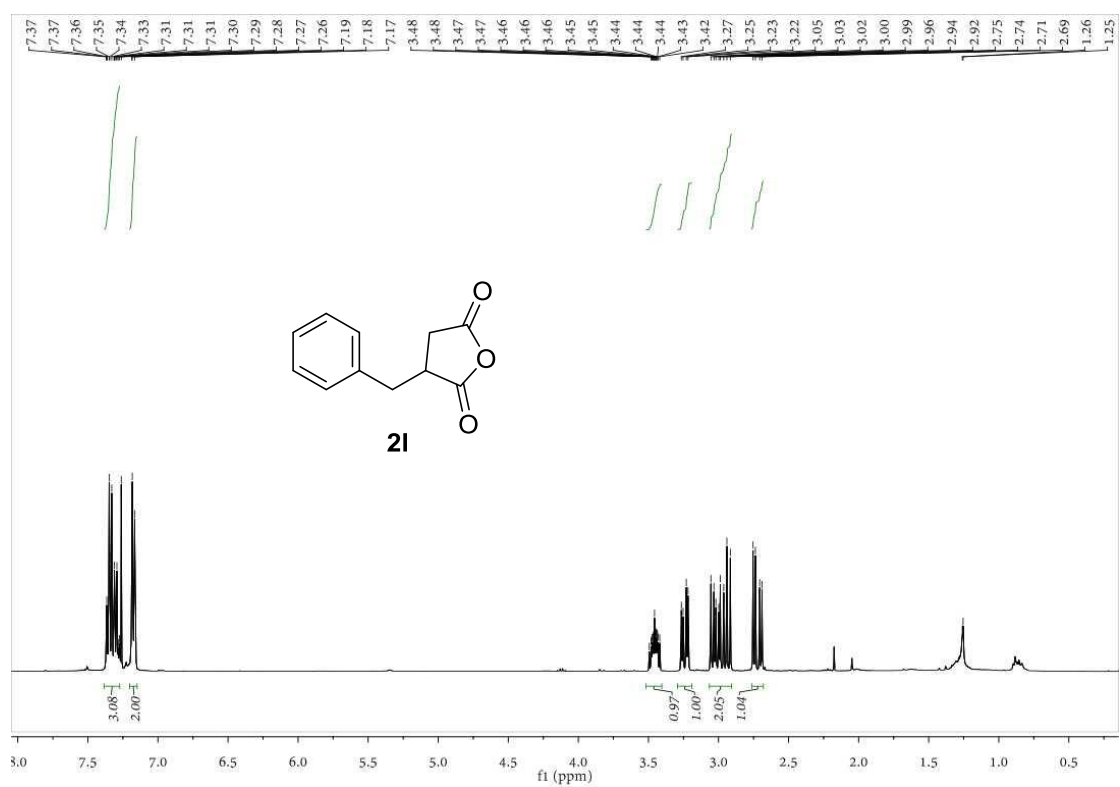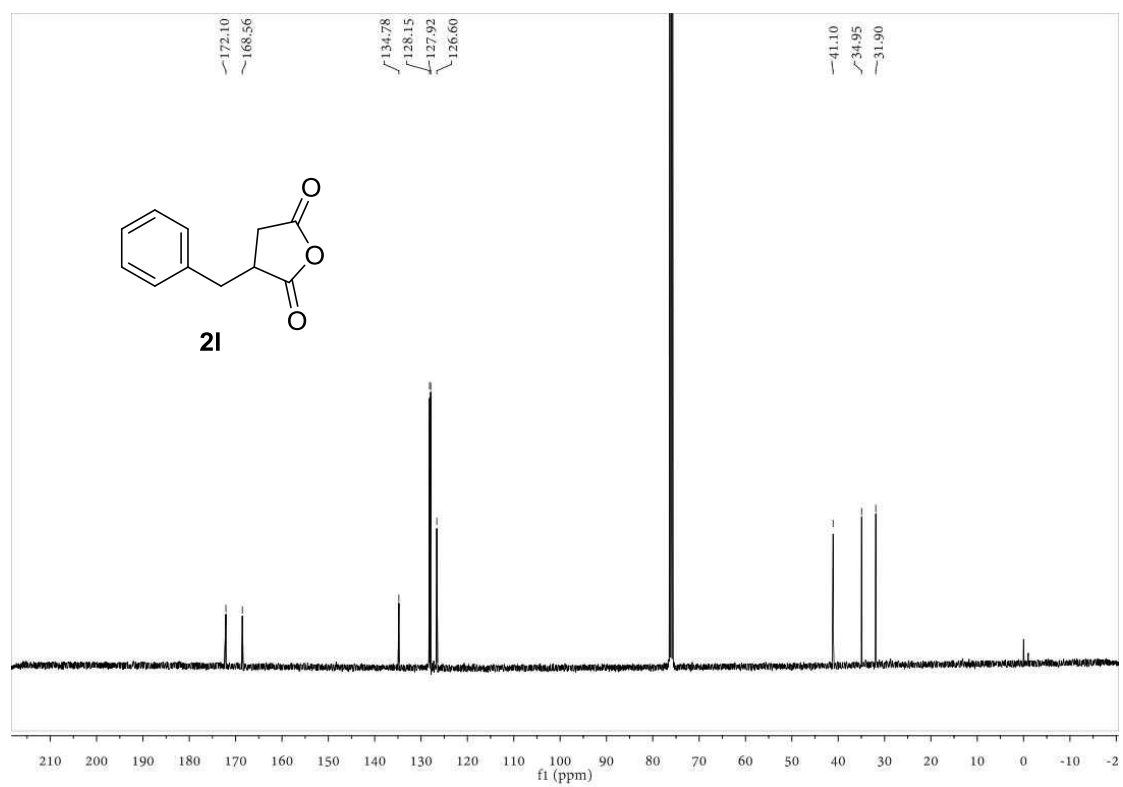

## VI. HPLC Spectra

Data File E:\DATA\HZY\SUANGAN\3F-161118 2016-11-19 13-05-46\033-2001.D  
Sample Name: H-STAND-RAC-2

```
=====
Acq. Operator   : SYSTEM                      Seq. Line :   20
Acq. Instrument : 1260HPLC-VWD                Location  : Vial 33
Injection Date  : 11/20/2016 3:32:00 AM        Inj       :    1
                                           Inj Volume: 2.000 µl

Acq. Method     : E:\DATA\HZY\SUANGAN\3F-161118 2016-11-19 13-05-46\VWD-AD(1-6)-98-2-1ML-2UL-
                  210NM-70MIN.M
Last changed    : 11/19/2016 9:29:56 PM by SYSTEM
Analysis Method : E:\DATA\HZY\SUANGAN\3F-161118 2016-11-19 13-05-46\VWD-AD(1-6)-98-2-1ML-2UL-
                  210NM-70MIN.M (Sequence Method)
Last changed    : 11/20/2016 8:42:59 PM by SYSTEM
                  (modified after loading)
Additional Info  : Peak(s) manually integrated
=====
```

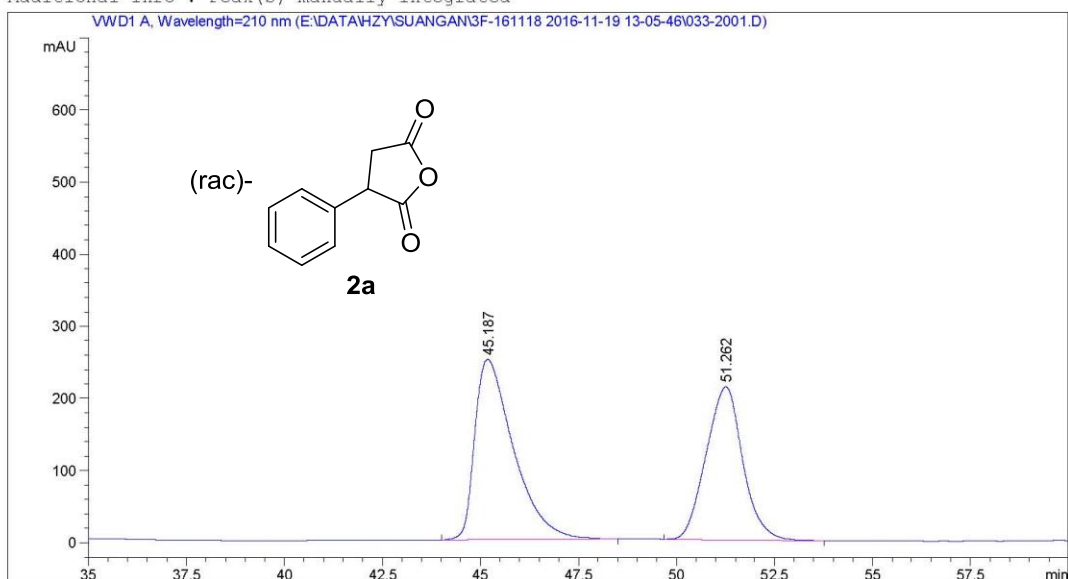

### Area Percent Report

```
=====
Sorted By      : Signal
Multiplier     : 1.0000
Dilution       : 1.0000
Do not use Multiplier & Dilution Factor with ISTDs
=====
```

Signal 1: VWD1 A, Wavelength=210 nm

| Peak # | RetTime [min] | Type | Width [min] | Area [mAU*s] | Height [mAU] | Area %  |
|--------|---------------|------|-------------|--------------|--------------|---------|
| 1      | 45.187        | BB   | 1.0309      | 1.70889e4    | 249.87816    | 55.3176 |
| 2      | 51.262        | BB   | 1.0065      | 1.38034e4    | 212.30431    | 44.6824 |

Totals : 3.08924e4 462.18246

Data File E:\DATA\HZY\SUANGAN\NBD161013-2 2016-10-13 20-12-43\052-0301.D  
Sample Name: nbd1013-2

```
=====
Acq. Operator   : SYSTEM                      Seq. Line :    3
Acq. Instrument : 1260HPLC-VWD                Location  : Vial 52
Injection Date  : 10/13/2016 9:30:10 PM        Inj       :    1
                                           Inj Volume: 2.000 µl
Acq. Method     : E:\DATA\HZY\SUANGAN\NBD161013-2 2016-10-13 20-12-43\VWD-AD(1-6)-98-2-1ML-
2UL-210NM-70MIN.M
Last changed    : 10/13/2016 8:12:44 PM by SYSTEM
Analysis Method : E:\DATA\HZY\SUANGAN\NBD161013-2 2016-10-13 20-12-43\VWD-AD(1-6)-98-2-1ML-
2UL-210NM-70MIN.M (Sequence Method)
Last changed    : 11/19/2016 7:17:50 PM by SYSTEM
(modified after loading)
Additional Info  : Peak(s) manually integrated
=====
```

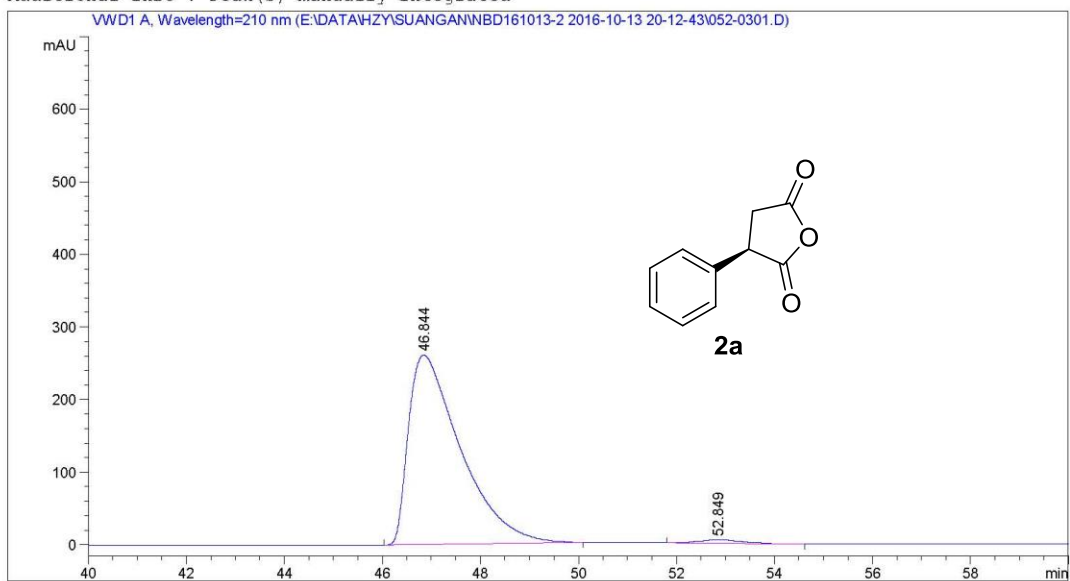

Area Percent Report

```
Sorted By      : Signal
Multiplier     : 1.0000
Dilution       : 1.0000
Do not use Multiplier & Dilution Factor with ISTDs
```

Signal 1: VWD1 A, Wavelength=210 nm

| Peak # | RetTime [min] | Type | Width [min] | Area [mAU*s] | Height [mAU] | Area %  |
|--------|---------------|------|-------------|--------------|--------------|---------|
| 1      | 46.844        | BB   | 1.1194      | 1.92409e4    | 260.90070    | 98.4577 |
| 2      | 52.849        | BB   | 0.8632      | 301.40305    | 4.70622      | 1.5423  |

Totals : 1.95423e4 265.60691

Data File E:\DATA\GWC\GWC16-12\ATH-SOLVENT 2016-12-13 20-47-43\064-0701.D  
Sample Name: 3ME-RAC

=====

|                 |                          |            |             |
|-----------------|--------------------------|------------|-------------|
| Acq. Operator   | : SYSTEM                 | Seq. Line  | : 7         |
| Acq. Instrument | : 1260HPLC-VWD           | Location   | : Vial 64   |
| Injection Date  | : 12/13/2016 11:40:18 PM | Inj        | : 1         |
|                 |                          | Inj Volume | : 10.000 µl |

Acq. Method : E:\DATA\GWC\GWC16-12\ATH-SOLVENT 2016-12-13 20-47-43\VWD-AD(1-6)-97-3-1ML-10UL-85MIN.M

Last changed : 12/13/2016 10:01:33 PM by SYSTEM

Analysis Method : E:\DATA\GWC\GWC16-12\ATH-SOLVENT 2016-12-13 20-47-43\VWD-AD(1-6)-97-3-1ML-10UL-85MIN.M (Sequence Method)

Last changed : 12/14/2016 9:15:55 AM by SYSTEM  
(modified after loading)

Additional Info : Peak(s) manually integrated

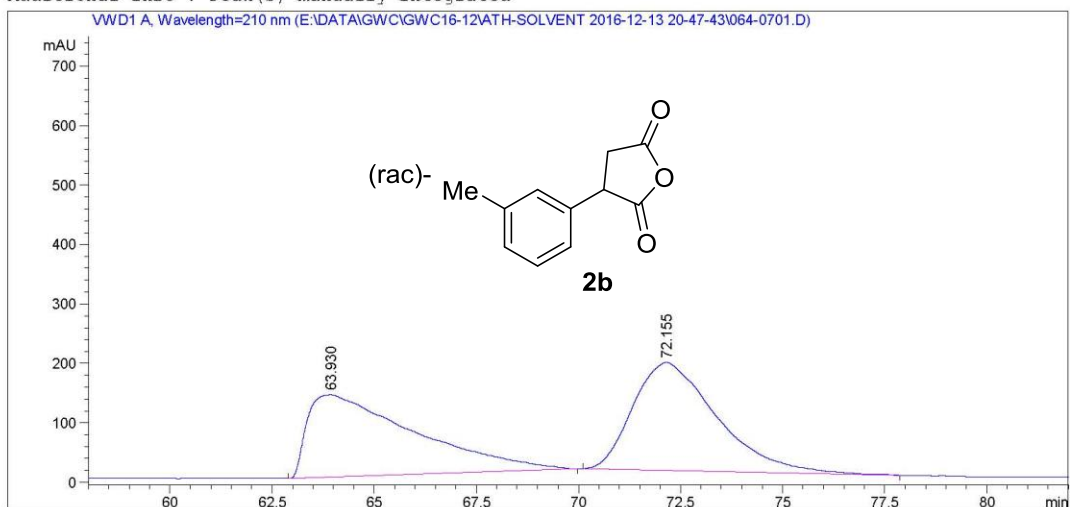

=====  
Area Percent Report  
=====

Sorted By : Signal  
Multiplier : 1.0000  
Dilution : 1.0000  
Do not use Multiplier & Dilution Factor with ISTDs

Signal 1: VWD1 A, Wavelength=210 nm

| Peak # | RetTime [min] | Type | Width [min] | Area [mAU*s] | Height [mAU] | Area %  |
|--------|---------------|------|-------------|--------------|--------------|---------|
| 1      | 63.930        | BB   | 2.3854      | 2.51050e4    | 138.58795    | 49.3451 |
| 2      | 72.155        | BB   | 1.8682      | 2.57714e4    | 181.43526    | 50.6549 |

Totals : 5.08764e4 320.02321

=====  
\*\*\* End of Report \*\*\*

Data File E:\DATA\HZY\SUANGAN\ATH-SOLVENT 2016-12-14 09-31-45\043-0201.D  
Sample Name: 3ME

```
=====
Acq. Operator   : SYSTEM                      Seq. Line :    2
Acq. Instrument : 1260HPLC-VWD                Location  : Vial 43
Injection Date  : 12/14/2016 9:42:24 AM       Inj       :    1
                                           Inj Volume: 10.000 µl

Acq. Method     : E:\DATA\HZY\SUANGAN\ATH-SOLVENT 2016-12-14 09-31-45\VWD-AD(1-6)-97-3-1ML-
                  10UL-85MIN.M
Last changed    : 12/14/2016 11:03:58 AM by SYSTEM
                  (modified after loading)
Analysis Method : E:\DATA\HZY\SUANGAN\ATH-SOLVENT 2016-12-14 09-31-45\VWD-AD(1-6)-97-3-1ML-
                  10UL-85MIN.M (Sequence Method)
Last changed    : 12/14/2016 11:14:50 AM by SYSTEM
                  (modified after loading)
Additional Info  : Peak(s) manually integrated
=====
```

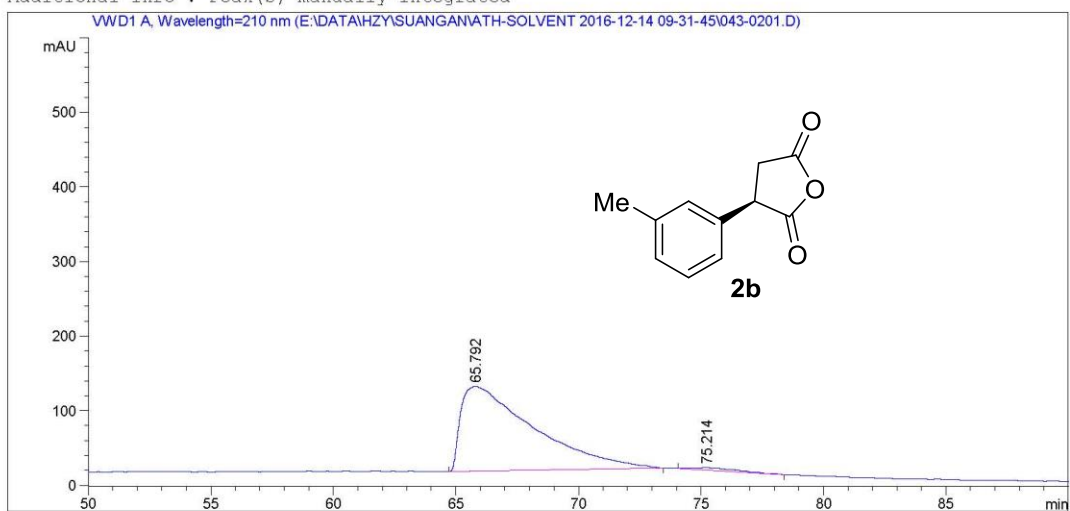

Area Percent Report

```
=====
Sorted By      : Signal
Multiplier     : 1.0000
Dilution       : 1.0000
Do not use Multiplier & Dilution Factor with ISTDs
=====
```

Signal 1: VWD1 A, Wavelength=210 nm

| Peak # | RetTime [min] | Type | Width [min] | Area [mAU*s] | Height [mAU] | Area %  |
|--------|---------------|------|-------------|--------------|--------------|---------|
| 1      | 65.792        | BB   | 2.6866      | 2.33380e4    | 113.46952    | 98.0013 |
| 2      | 75.214        | BB   | 1.6377      | 475.97626    | 3.49540      | 1.9987  |

Totals : 2.38140e4 116.96493



Data File E:\DATA\HZY\SUANGAN\4ME-AS 2016-11-25 09-55-04\041-0301.D  
Sample Name: 4ME-RAC

```
=====
Acq. Operator   : SYSTEM                      Seq. Line :    3
Acq. Instrument : 1260HPLC-VWD                Location  : Vial 41
Injection Date  : 11/25/2016 11:51:34 AM      Inj       :    1
                                           Inj Volume: 10.000 µl

Acq. Method     : E:\DATA\HZY\SUANGAN\4ME-AS 2016-11-25 09-55-04\VWD-AS (1-2)-95-5-1-10UL-
                  210NM-85MIN.M
Last changed    : 11/25/2016 11:36:33 AM by SYSTEM
Analysis Method : E:\DATA\HZY\SUANGAN\4ME-AS 2016-11-25 09-55-04\VWD-AS (1-2)-95-5-1-10UL-
                  210NM-85MIN.M (Sequence Method)
Last changed    : 11/25/2016 4:04:58 PM by SYSTEM
                  (modified after loading)
Additional Info : Peak(s) manually integrated
=====
```

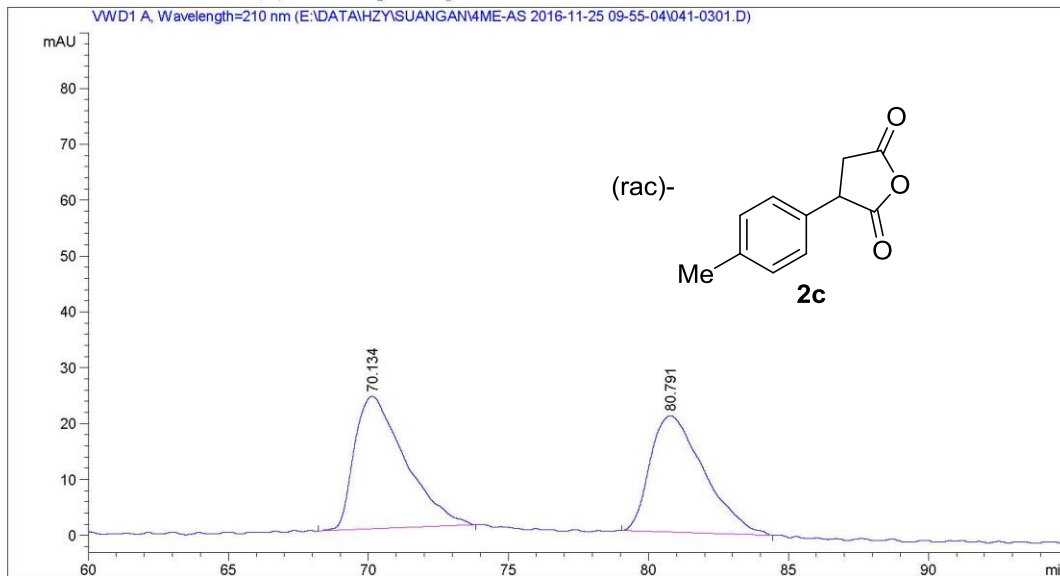

Area Percent Report

```
=====
Sorted By      : Signal
Multiplier     : 1.0000
Dilution       : 1.0000
Use Multiplier & Dilution Factor with ISTDs
=====
```

Signal 1: VWD1 A, Wavelength=210 nm

| Peak # | RetTime [min] | Type | Width [min] | Area [mAU*s] | Height [mAU] | Area %  |
|--------|---------------|------|-------------|--------------|--------------|---------|
| 1      | 70.134        | BB   | 1.7711      | 2983.73730   | 23.72738     | 51.6496 |
| 2      | 80.791        | BB   | 1.8465      | 2793.14331   | 20.85506     | 48.3504 |

Totals : 5776.88062 44.58245

Sample Name: 4ME-EE

```

=====
Acq. Operator   : SYSTEM                      Seq. Line :    2
Acq. Instrument : 1260HPLC-VWD                Location  : Vial 45
Injection Date  : 11/26/2016 12:50:01 PM      Inj       :    1
                                           Inj Volume: 10.000 µl

Acq. Method     : E:\DATA\HZY\SUANGAN\YXG-305 2016-11-26 12-27-03\VWD-AS(1-2)-95-5-1-10UL-
                  210NM-100MIN.M
Last changed    : 11/26/2016 12:27:05 PM by SYSTEM
Analysis Method : E:\DATA\HZY\SUANGAN\YXG-305 2016-11-26 12-27-03\VWD-AS(1-2)-95-5-1-10UL-
                  210NM-100MIN.M (Sequence Method)
Last changed    : 1/13/2017 10:47:13 AM by SYSTEM
                  (modified after loading)
Additional Info  : Peak(s) manually integrated
  
```

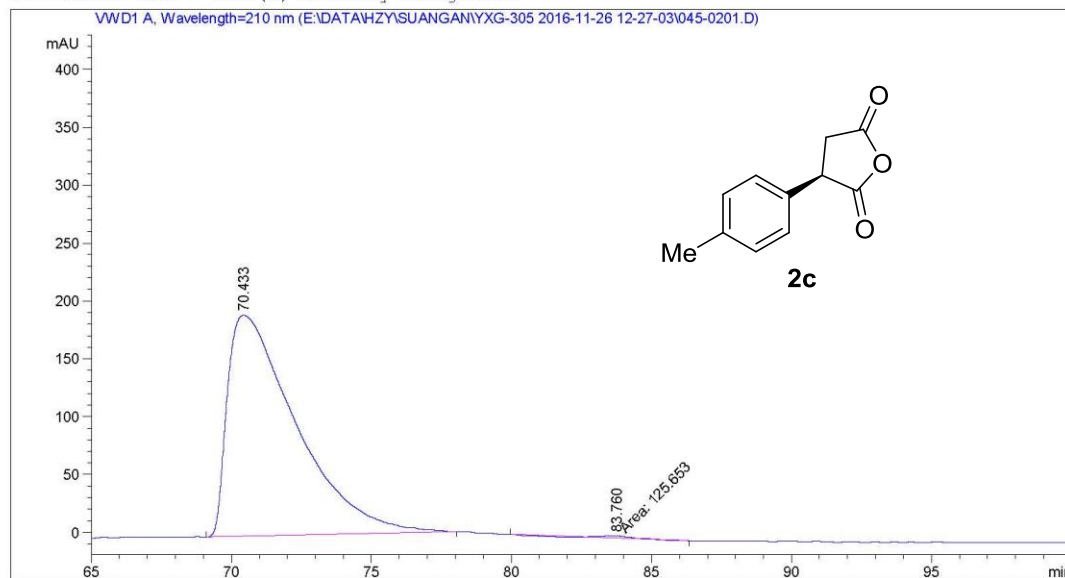

```

=====
Area Percent Report
=====
  
```

```

Sorted By      : Signal
Multiplier     : 1.0000
Dilution       : 1.0000
Use Multiplier & Dilution Factor with ISTDs
  
```

Signal 1: VWD1 A, Wavelength=210 nm

| Peak # | RetTime [min] | Type | Width [min] | Area [mAU*s] | Height [mAU] | Area %  |
|--------|---------------|------|-------------|--------------|--------------|---------|
| 1      | 70.433        | BB   | 2.4415      | 3.25218e4    | 191.00113    | 99.6151 |
| 2      | 83.760        | MM   | 1.2993      | 125.65295    | 1.61180      | 0.3849  |

Totals : 3.26474e4 192.61293

Data File E:\DATA\HZY\SUANGAN\2OME-RAC 2016-12-06 16-11-08\032-0701.D  
Sample Name: 2OME-PDC-90

```
=====
Acq. Operator   : SYSTEM                      Seq. Line :    7
Acq. Instrument : 1260HPLC-DAD                Location  : Vial 32
Injection Date  : 12/6/2016 7:18:18 PM        Inj       :    1
                                           Inj Volume: 5.000 µl

Acq. Method     : E:\DATA\HZY\SUANGAN\2OME-RAC 2016-12-06 16-11-08\DAD-AD(1-2)-950-10-1.OML-5
                  -ALL-60MIN.M
Last changed    : 12/6/2016 7:21:34 PM by SYSTEM
                  (modified after loading)
Analysis Method : E:\DATA\HZY\SUANGAN\2OME-RAC 2016-12-06 16-11-08\DAD-AD(1-2)-950-10-1.OML-5
                  -ALL-60MIN.M (Sequence Method)
Last changed    : 12/6/2016 9:32:27 PM by SYSTEM
                  (modified after loading)
Additional Info : Peak(s) manually integrated
=====
```

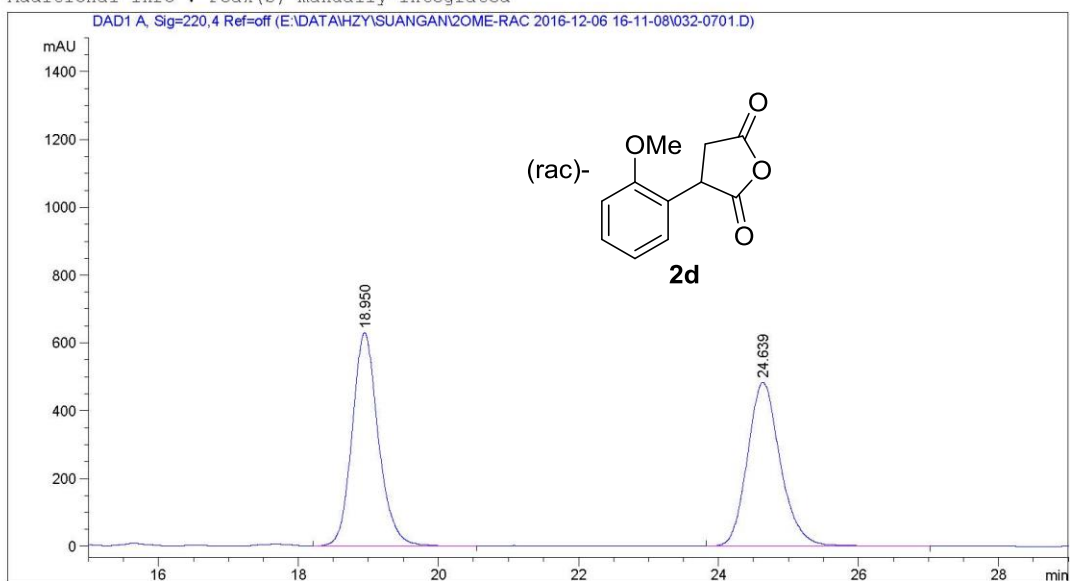

Area Percent Report

```
=====
Sorted By      :      Signal
Multiplier     :      1.0000
Dilution       :      1.0000
Do not use Multiplier & Dilution Factor with ISTDs
=====
```

Signal 1: DAD1 A, Sig=220,4 Ref=off

| Peak # | RetTime [min] | Type | Width [min] | Area [mAU*s] | Height [mAU] | Area %  |
|--------|---------------|------|-------------|--------------|--------------|---------|
| 1      | 18.950        | BB   | 0.3952      | 1.63472e4    | 629.07904    | 50.9966 |
| 2      | 24.639        | BB   | 0.4957      | 1.57083e4    | 482.61929    | 49.0034 |

Totals : 3.20555e4 1111.69833

Data File E:\DATA\HZY\SUANGAN\ZOME 2016-12-06 20-19-09\033-0301.D  
Sample Name: ZOME-EE

```
=====
Acq. Operator   : SYSTEM                      Seq. Line :    3
Acq. Instrument : 1260HPLC-DAD                Location  : Vial 33
Injection Date  : 12/6/2016 9:01:57 PM        Inj       :    1
                                           Inj Volume: 5.000 µl

Acq. Method     : E:\DATA\HZY\SUANGAN\ZOME 2016-12-06 20-19-09\DAD-AD(1-2)-950-10-1.0ML-5-ALL
                  -60MIN.M
Last changed    : 12/6/2016 9:30:24 PM by SYSTEM
                  (modified after loading)
Analysis Method : E:\DATA\HZY\SUANGAN\ZOME 2016-12-06 20-19-09\DAD-AD(1-2)-950-10-1.0ML-5-ALL
                  -60MIN.M (Sequence Method)
Last changed    : 12/6/2016 9:35:44 PM by SYSTEM
                  (modified after loading)
Additional Info : Peak(s) manually integrated
=====
```

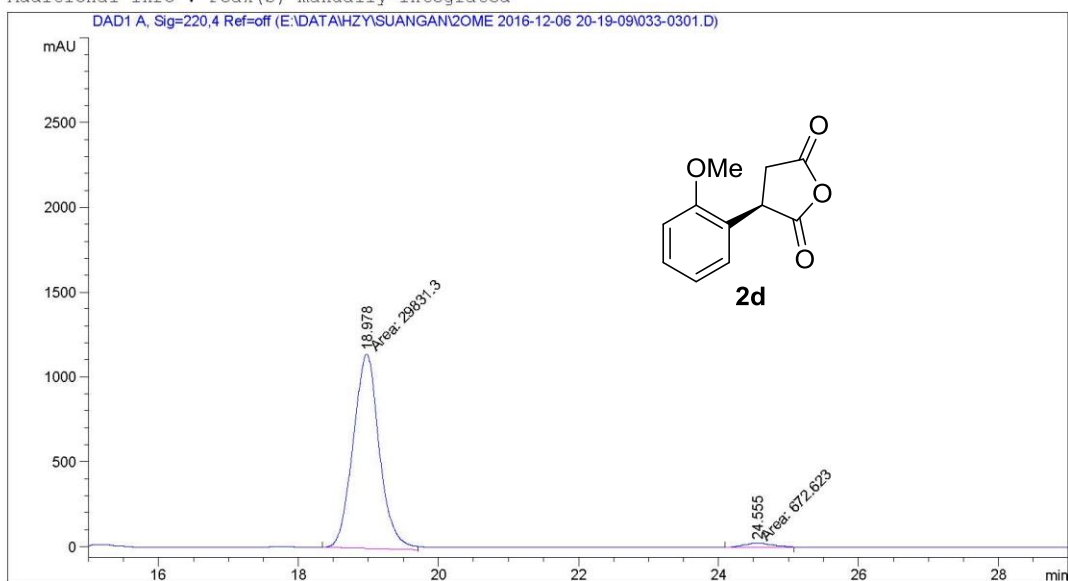

# Area Percent Report

```
=====
Sorted By      :      Signal
Multiplier     :      1.0000
Dilution       :      1.0000
Do not use Multiplier & Dilution Factor with ISTDs
=====
```

Signal 1: DAD1 A, Sig=220,4 Ref=off

| Peak # | RetTime [min] | Type | Width [min] | Area [mAU*s] | Height [mAU] | Area %  |
|--------|---------------|------|-------------|--------------|--------------|---------|
| 1      | 18.978        | MM   | 0.4341      | 2.98313e4    | 1145.43665   | 97.7950 |
| 2      | 24.555        | MM   | 0.4879      | 672.62268    | 22.97658     | 2.2050  |

Totals : 3.05040e4 1168.41322

Data File E:\DATA\HZY\SUANGAN\SUBSTRATE-161021-2 2016-10-21 13-42-13\087-0201.D  
Sample Name: H-7-RAC

```
=====
Acq. Operator   : SYSTEM                      Seq. Line :    2
Acq. Instrument : 1260HPLC-VWD                Location  : Vial 87
Injection Date  : 10/21/2016 1:53:46 PM        Inj       :    1
                                           Inj Volume: 10.000 µl

Acq. Method     : E:\DATA\HZY\SUANGAN\SUBSTRATE-161021-2 2016-10-21 13-42-13\VWD-AD(1-6)-98-2
                  -1ML-85MIN-10UL-210NM.M
Last changed    : 10/21/2016 1:42:14 PM by SYSTEM
Analysis Method : E:\DATA\HZY\SUANGAN\SUBSTRATE-161021-2 2016-10-21 13-42-13\VWD-AD(1-6)-98-2
                  -1ML-85MIN-10UL-210NM.M (Sequence Method)
Last changed    : 11/19/2016 6:56:06 PM by SYSTEM
                  (modified after loading)
Additional Info : Peak(s) manually integrated
=====
```

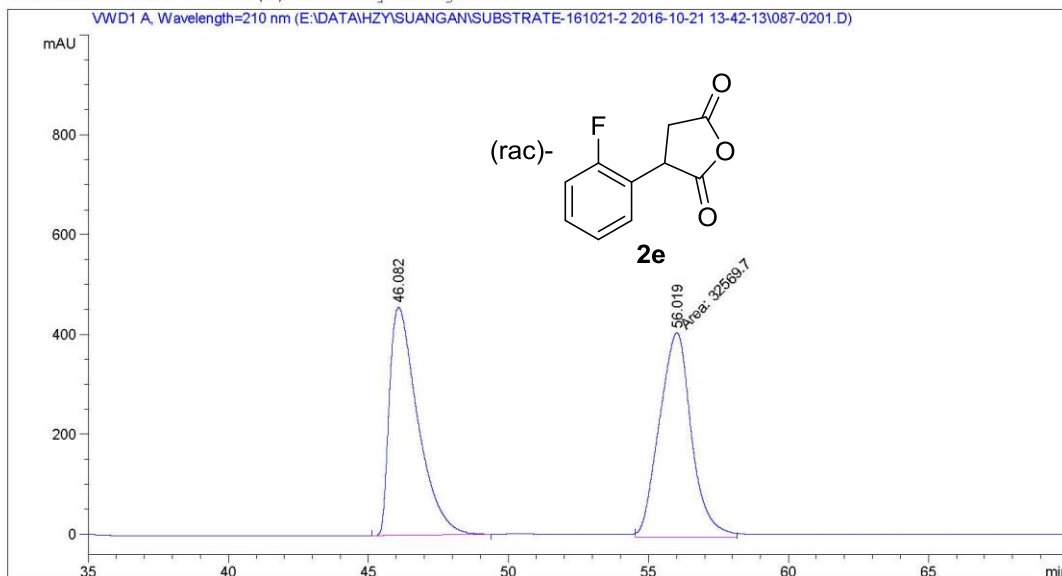

Area Percent Report

```
Sorted By      : Signal
Multiplier     : 1.0000
Dilution       : 1.0000
Do not use Multiplier & Dilution Factor with ISTDs
```

Signal 1: VWD1 A, Wavelength=210 nm

| Peak # | RetTime [min] | Type | Width [min] | Area [mAU*s] | Height [mAU] | Area %  |
|--------|---------------|------|-------------|--------------|--------------|---------|
| 1      | 46.082        | BB   | 1.0640      | 3.20332e4    | 456.87238    | 49.5847 |
| 2      | 56.019        | MM   | 1.3273      | 3.25697e4    | 408.98584    | 50.4153 |

Totals : 6.46029e4 865.85822

Sample Name: 2F

```
=====
Acq. Operator   : SYSTEM                      Seq. Line :    6
Acq. Instrument : 1260HPLC-VWD                Location  : Vial 35
Injection Date  : 11/19/2016 4:39:51 PM        Inj       :    1
                                           Inj Volume: 10.000 µl

Acq. Method     : E:\DATA\HZY\SUANGAN\3F-161118 2016-11-19 13-05-46\VWD-AD(1-6)-98-2-1ML-10UL
                  -210-85MIN.M
Last changed    : 11/19/2016 1:05:46 PM by SYSTEM
Analysis Method : E:\DATA\HZY\SUANGAN\3F-161118 2016-11-19 13-05-46\VWD-AD(1-6)-98-2-1ML-10UL
                  -210-85MIN.M (Sequence Method)
Last changed    : 11/19/2016 6:57:32 PM by SYSTEM
                  (modified after loading)
Additional Info : Peak(s) manually integrated
=====
```

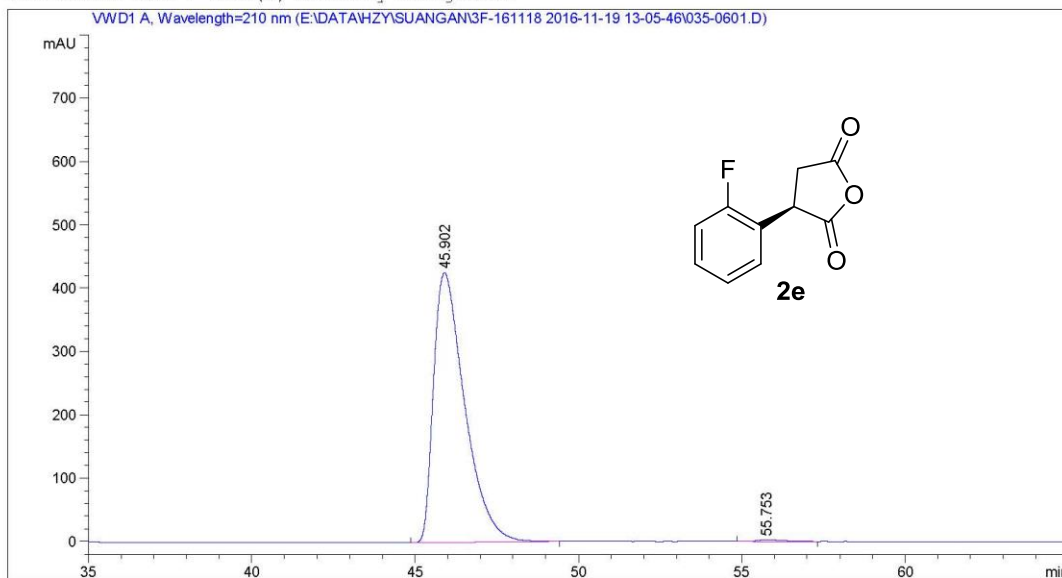

Area Percent Report

```
=====
Sorted By      :      Signal
Multiplier     :      1.0000
Dilution       :      1.0000
Do not use Multiplier & Dilution Factor with ISTDs
=====
```

Signal 1: VWD1 A, Wavelength=210 nm

| Peak # | RetTime [min] | Type | Width [min] | Area [mAU*s] | Height [mAU] | Area %  |
|--------|---------------|------|-------------|--------------|--------------|---------|
| 1      | 45.902        | BB   | 1.0039      | 2.81280e4    | 425.66272    | 99.4292 |
| 2      | 55.753        | BB   | 0.8410      | 161.47997    | 2.47223      | 0.5708  |

Totals : 2.82895e4 428.13495

Data File E:\DATA\HZY\SUANGAN\4F-RAC 2016-12-05 15-01-51\013-1201.D  
Sample Name: 3F-ER

=====

|                                               |                                                                                                          |            |             |
|-----------------------------------------------|----------------------------------------------------------------------------------------------------------|------------|-------------|
| Acq. Operator                                 | : SYSTEM                                                                                                 | Seq. Line  | : 12        |
| Acq. Instrument                               | : 1260HPLC-DAD                                                                                           | Location   | : Vial 13   |
| Injection Date                                | : 12/5/2016 9:32:26 PM                                                                                   | Inj        | : 1         |
|                                               |                                                                                                          | Inj Volume | : 10.000 µl |
| Acq. Method                                   | : E:\DATA\HZY\SUANGAN\4F-RAC 2016-12-05 15-01-51\DAD-AD(1-2)-93-7-1.0ML-10-ALL-50MIN.M                   |            |             |
| Last changed                                  | : 12/5/2016 5:38:50 PM by SYSTEM                                                                         |            |             |
| Analysis Method                               | : E:\DATA\HZY\SUANGAN\4F-RAC 2016-12-05 15-01-51\DAD-AD(1-2)-93-7-1.0ML-10-ALL-50MIN.M (Sequence Method) |            |             |
| Last changed                                  | : 12/6/2016 9:53:48 AM by SYSTEM<br>(modified after loading)                                             |            |             |
| Additional Info : Peak(s) manually integrated |                                                                                                          |            |             |

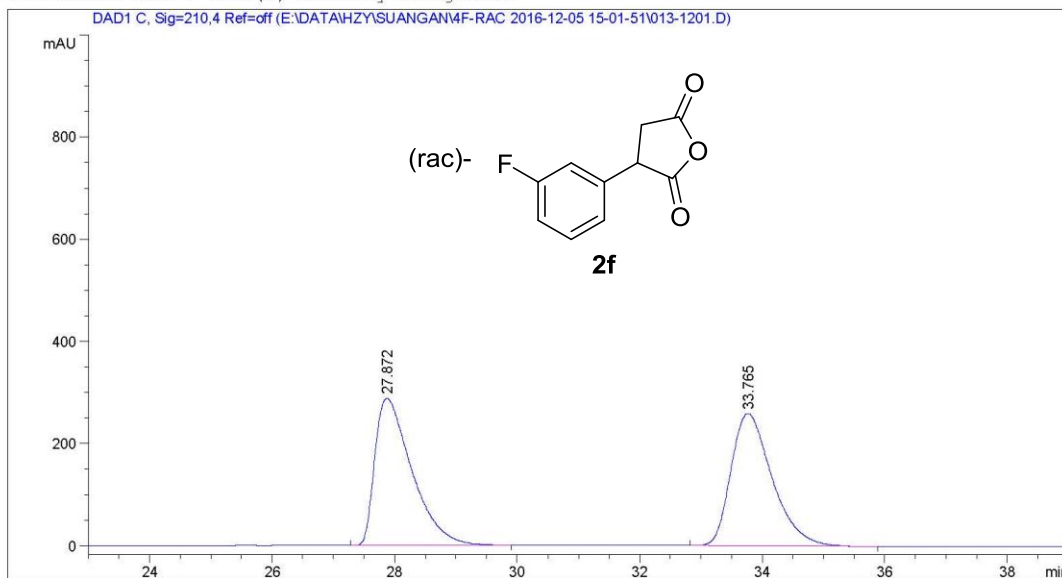

Area Percent Report

Sorted By : Signal  
Multiplier : 1.0000  
Dilution : 1.0000  
Do not use Multiplier & Dilution Factor with ISTDs

Signal 1: DAD1 C, Sig=210,4 Ref=off

| Peak # | RetTime [min] | Type | Width [min] | Area [mAU*s] | Height [mAU] | Area %  |
|--------|---------------|------|-------------|--------------|--------------|---------|
| 1      | 27.872        | BB   | 0.6337      | 1.20300e4    | 287.79364    | 50.0087 |
| 2      | 33.765        | BB   | 0.7060      | 1.20258e4    | 258.84329    | 49.9913 |

Totals : 2.40558e4 546.63693



Data File E:\DATA\HZY\SUANGAN\3CL-15MIN-161203 2016-12-03 19-21-18\063-1001.D  
Sample Name: 3F

```
=====
Acq. Operator   : SYSTEM                      Seq. Line :   10
Acq. Instrument : 1260HPLC-VWD                Location  : Vial 63
Injection Date  : 12/3/2016 10:37:02 PM       Inj       :    1
                                           Inj Volume: 10.000 µl

Acq. Method     : E:\DATA\HZY\SUANGAN\3CL-15MIN-161203 2016-12-03 19-21-18\VWD-AD(1-2)-93-7-1
                                           .0ML-10UL-210NM-50MIN.M
Last changed    : 12/3/2016 10:56:38 PM by SYSTEM
                  (modified after loading)
Analysis Method : E:\DATA\HZY\SUANGAN\3CL-15MIN-161203 2016-12-03 19-21-18\VWD-AD(1-2)-93-7-1
                                           .0ML-10UL-210NM-50MIN.M (Sequence Method)
Last changed    : 12/6/2016 9:50:12 AM by SYSTEM
                  (modified after loading)
Additional Info  : Peak(s) manually integrated
=====
```

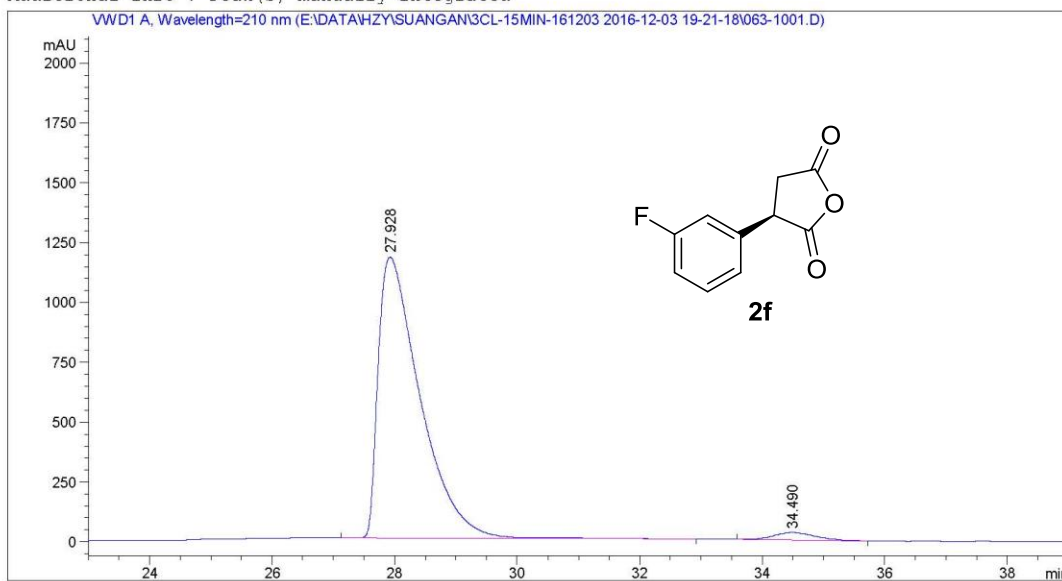

# Area Percent Report

```
=====
Sorted By      :      Signal
Multiplier     :      1.0000
Dilution       :      1.0000
Do not use Multiplier & Dilution Factor with ISTDs
=====
```

Signal 1: VWD1 A, Wavelength=210 nm

| Peak # | RetTime [min] | Type | Width [min] | Area [mAU*s] | Height [mAU] | Area %  |
|--------|---------------|------|-------------|--------------|--------------|---------|
| 1      | 27.928        | BB   | 0.7088      | 5.54647e4    | 1172.71887   | 97.4936 |
| 2      | 34.490        | BB   | 0.7224      | 1425.90808   | 30.33747     | 2.5064  |

Totals : 5.68906e4 1203.05635



Data File E:\DATA\SLY\SLY-A-62\WSW-2-21 2017-01-13 16-58-38\002-0701.D  
Sample Name: 4F-RAC-90

```
=====
Acq. Operator   : SYSTEM                      Seq. Line :    7
Acq. Instrument : 1260HPLC-DAD                Location  : Vial 2
Injection Date  : 1/13/2017 8:23:07 PM        Inj       :    1
                                           Inj Volume: 2.000 µl
Acq. Method     : E:\DATA\SLY\SLY-A-62\WSW-2-21 2017-01-13 16-58-38\
DAD-OJ(1-2)-90-10-2UL-1ML-20MIN.M
Last changed    : 1/13/2017 7:28:27 PM by SYSTEM
Analysis Method : E:\DATA\SLY\SLY-A-62\WSW-2-21 2017-01-13 16-58-38\
DAD-OJ(1-2)-90-10-2UL-1ML-20MIN.M (Sequence Method)
Last changed    : 1/14/2017 11:06:06 AM by SYSTEM
                (modified after loading)
Additional Info : Peak(s) manually integrated
=====
```

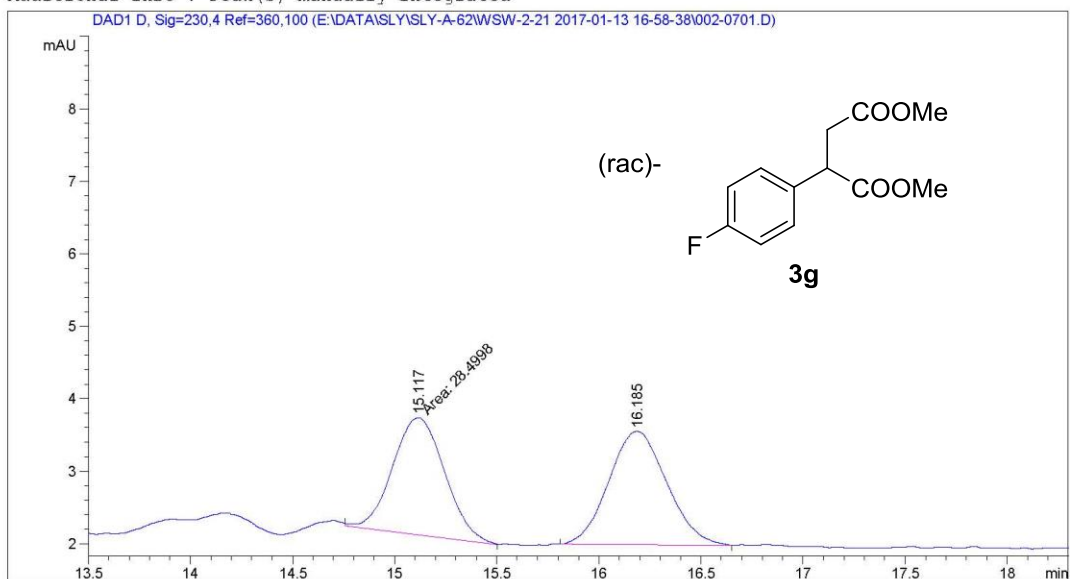

Area Percent Report

```
=====
Sorted By      : Signal
Multiplier     : 1.0000
Dilution       : 1.0000
Do not use Multiplier & Dilution Factor with ISTDs
=====
```

Signal 1: DAD1 D, Sig=230,4 Ref=360,100

| Peak # | RetTime [min] | Type | Width [min] | Area [mAU*s] | Height [mAU] | Area %  |
|--------|---------------|------|-------------|--------------|--------------|---------|
| 1      | 15.117        | MM   | 0.2936      | 28.49981     | 1.61779      | 48.0550 |
| 2      | 16.185        | BB   | 0.2859      | 30.80683     | 1.56365      | 51.9450 |

Totals : 59.30663 3.18143

Data File E:\DATA\SLY\SLY-A-62\WSW-2-21 2017-01-13 16-58-38\001-0801.D  
Sample Name: 4F-EE-90

```
=====
Acq. Operator   : SYSTEM                               Seq. Line :    8
Acq. Instrument : 1260HPLC-DAD                         Location  : Vial 1
Injection Date  : 1/13/2017 8:44:01 PM                 Inj       :    1
                                                    Inj Volume: 2.000 µl

Acq. Method     : E:\DATA\SLY\SLY-A-62\WSW-2-21 2017-01-13 16-58-38\DAD-OJ(1-2)-90-10-2UL-1ML
                  -20MIN.M
Last changed    : 1/13/2017 7:28:27 PM by SYSTEM
Analysis Method : E:\DATA\SLY\SLY-A-62\WSW-2-21 2017-01-13 16-58-38\DAD-OJ(1-2)-90-10-2UL-1ML
                  -20MIN.M (Sequence Method)
Last changed    : 1/14/2017 11:08:13 AM by SYSTEM
                  (modified after loading)
Additional Info  : Peak(s) manually integrated
=====
```

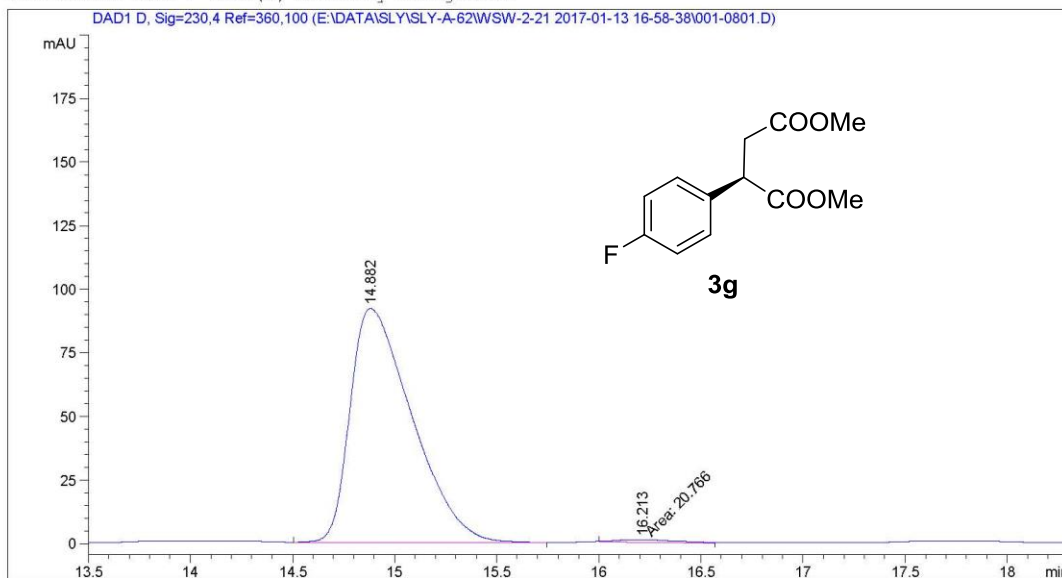

Area Percent Report

```
=====
Sorted By      : Signal
Multiplier     : 1.0000
Dilution       : 1.0000
Do not use Multiplier & Dilution Factor with ISTDs
=====
```

Signal 1: DAD1 D, Sig=230,4 Ref=360,100

| Peak # | RetTime [min] | Type | Width [min] | Area [mAU*s] | Height [mAU] | Area %  |
|--------|---------------|------|-------------|--------------|--------------|---------|
| 1      | 14.882        | BB   | 0.3185      | 1922.82996   | 91.76545     | 98.9316 |
| 2      | 16.213        | MM   | 0.3546      | 20.76598     | 9.76038e-1   | 1.0684  |

Totals : 1943.59594 92.74149

Data File E:\DATA\HZY\SUANGAN\4CL-EASTER 2016-12-21 11-18-59\072-0301.D  
Sample Name: 4CL-EASTER-RAC

```
=====
Acq. Operator   : SYSTEM                      Seq. Line :    3
Acq. Instrument : 1260HPLC-VWD                Location  : Vial 72
Injection Date  : 12/21/2016 12:31:13 PM      Inj       :    1
                                           Inj Volume: 2.000 µl

Acq. Method     : E:\DATA\HZY\SUANGAN\4CL-EASTER 2016-12-21 11-18-59\VWD-AD(1-6)-90-10-1ML-
                  2UL-210NM-60MIN.M
Last changed    : 12/21/2016 11:18:59 AM by SYSTEM
Analysis Method : E:\DATA\HZY\SUANGAN\4CL-EASTER 2016-12-21 11-18-59\VWD-AD(1-6)-90-10-1ML-
                  2UL-210NM-60MIN.M (Sequence Method)
Last changed    : 12/21/2016 6:27:08 PM by SYSTEM
                  (modified after loading)
Additional Info : Peak(s) manually integrated
=====
```

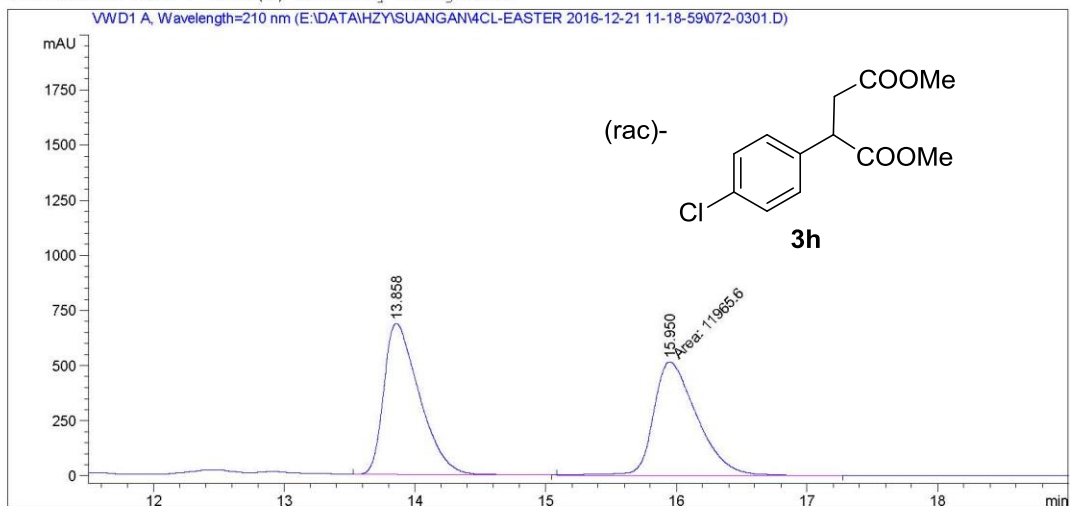

# Area Percent Report

```
=====
Sorted By      :      Signal
Multiplier     :      1.0000
Dilution       :      1.0000
Do not use Multiplier & Dilution Factor with ISTDs
=====
```

Signal 1: VWD1 A, Wavelength=210 nm

| Peak # | RetTime [min] | Type | Width [min] | Area [mAU*s] | Height [mAU] | Area %  |
|--------|---------------|------|-------------|--------------|--------------|---------|
| 1      | 13.858        | BB   | 0.2859      | 1.28946e4    | 684.12494    | 51.8684 |
| 2      | 15.950        | MM   | 0.3871      | 1.19656e4    | 515.14160    | 48.1316 |

Totals :                    2.48603e4   1199.26654

\*\*\* End of Report \*\*\*

Data File E:\DATA\HZY\SUANGAN\4CL-4BR-EST 2016-12-28 15-16-27\092-0201.D  
Sample Name: 4CL-EST

```
=====
Acq. Operator   : SYSTEM                      Seq. Line :    2
Acq. Instrument : 1260HPLC-DAD                Location  : Vial 92
Injection Date  : 12/28/2016 3:28:34 PM        Inj       :    1
                                           Inj Volume: 1.000 µl

Acq. Method     : E:\DATA\HZY\SUANGAN\4CL-4BR-EST 2016-12-28 15-16-27\
DAD-OJ(1-6)-98-2-1UL-1ML-50MIN.M
Last changed    : 12/28/2016 3:16:36 PM by SYSTEM
Analysis Method : E:\DATA\HZY\SUANGAN\4CL-4BR-EST 2016-12-28 15-16-27\
DAD-OJ(1-6)-98-2-1UL-1ML-50MIN.M (Sequence Method)
Last changed    : 1/15/2017 9:59:01 PM by SYSTEM
                 (modified after loading)
Additional Info  : Peak(s) manually integrated
=====
```

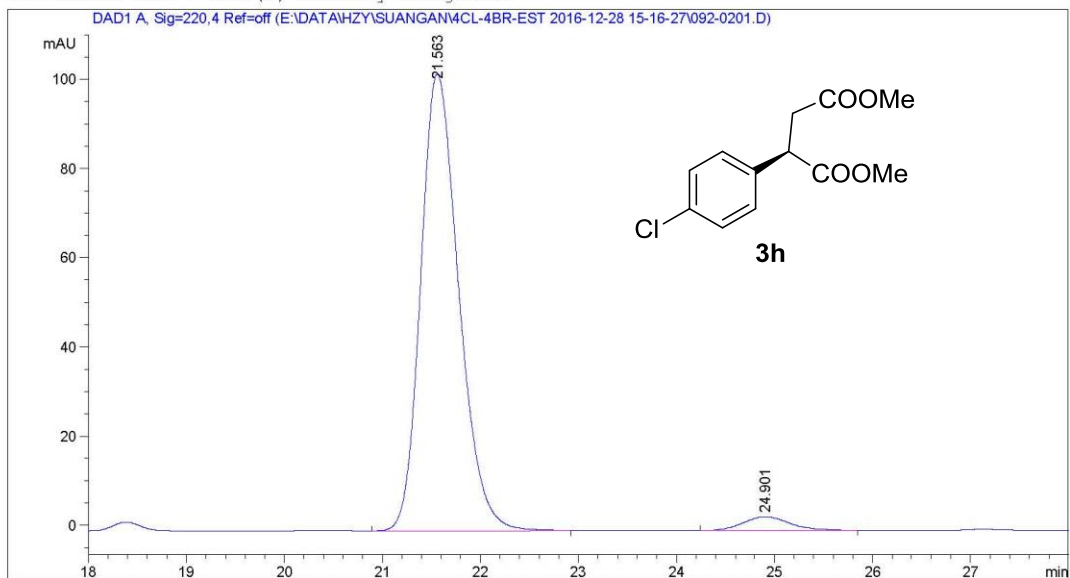

Area Percent Report

```
=====
Sorted By      :      Signal
Multiplier     :      1.0000
Dilution       :      1.0000
Do not use Multiplier & Dilution Factor with ISTDs
=====
```

Signal 1: DAD1 A, Sig=220,4 Ref=off

| Peak # | RetTime [min] | Type | Width [min] | Area [mAU*s] | Height [mAU] | Area %  |
|--------|---------------|------|-------------|--------------|--------------|---------|
| 1      | 21.563        | BB   | 0.4157      | 2755.22803   | 102.46368    | 96.4520 |
| 2      | 24.901        | BB   | 0.4617      | 101.35017    | 3.06556      | 3.5480  |

Totals : 2856.57819 105.52924

Data File E:\DATA\HZY\SUANGAN\CL-161201 2016-12-01 19-50-42\062-1601.D  
Sample Name: 3CL-RAC

```
=====
Acq. Operator   : SYSTEM                      Seq. Line :   16
Acq. Instrument : 1260HPLC-VWD                Location  : Vial 62
Injection Date  : 12/2/2016 6:17:40 AM        Inj       :    1
                                           Inj Volume: 10.000 µl

Acq. Method     : E:\DATA\HZY\SUANGAN\CL-161201 2016-12-01 19-50-42\VWD-AD(1-2)-93-7-1.0ML-
                  10UL-210NM-50MIN.M
Last changed    : 12/1/2016 7:50:43 PM by SYSTEM
Analysis Method : E:\DATA\HZY\SUANGAN\CL-161201 2016-12-01 19-50-42\VWD-AD(1-2)-93-7-1.0ML-
                  10UL-210NM-50MIN.M (Sequence Method)
Last changed    : 12/3/2016 9:37:21 PM by SYSTEM
                  (modified after loading)
Additional Info  : Peak(s) manually integrated
=====
```

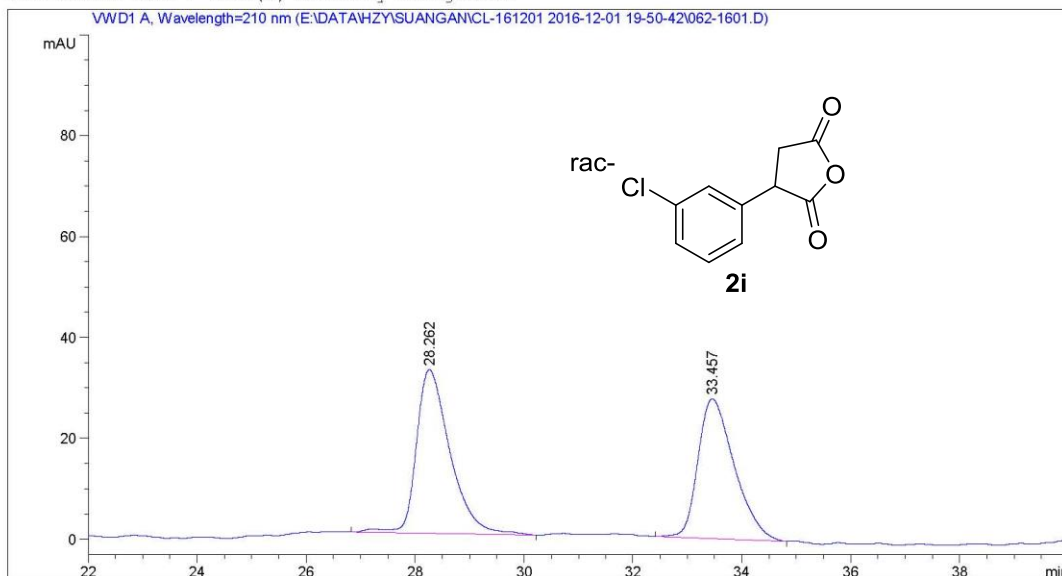

Area Percent Report

```
=====
Sorted By      : Signal
Multiplier     : 1.0000
Dilution       : 1.0000
Do not use Multiplier & Dilution Factor with ISTDs
=====
```

Signal 1: VWD1 A, Wavelength=210 nm

| Peak # | RetTime [min] | Type | Width [min] | Area [mAU*s] | Height [mAU] | Area %  |
|--------|---------------|------|-------------|--------------|--------------|---------|
| 1      | 28.262        | BB   | 0.6506      | 1394.35962   | 32.42965     | 52.0825 |
| 2      | 33.457        | BB   | 0.7101      | 1282.85388   | 27.71011     | 47.9175 |

Totals : 2677.21350 60.13976

Data File C:\CHEM32\1\DATA\SNAPSHOT.D

Sample Name:

```
=====
Acq. Operator   : SYSTEM                      Seq. Line :    6
                                           Location  : Vial 62
Injection Date  : 12/3/2016 8:59:40 PM        Inj       :    1
Acq. Method     : VWD-AD(1-2)-93-7-1.0ML-10UL-210NM-50MIN.M
Analysis Method : E:\DATA\LXX\LXX-CN-COOME\LXX-3-175 2016-12-03 08-32-19\VWD-OD(1-6)-92-8-0.
                                           8ML3UL-210NM-35MIN.M (Sequence Method)
Last changed    : 12/3/2016 9:39:50 PM by SYSTEM
                                           (modified after loading)
Additional Info  : Peak(s) manually integrated
=====
```

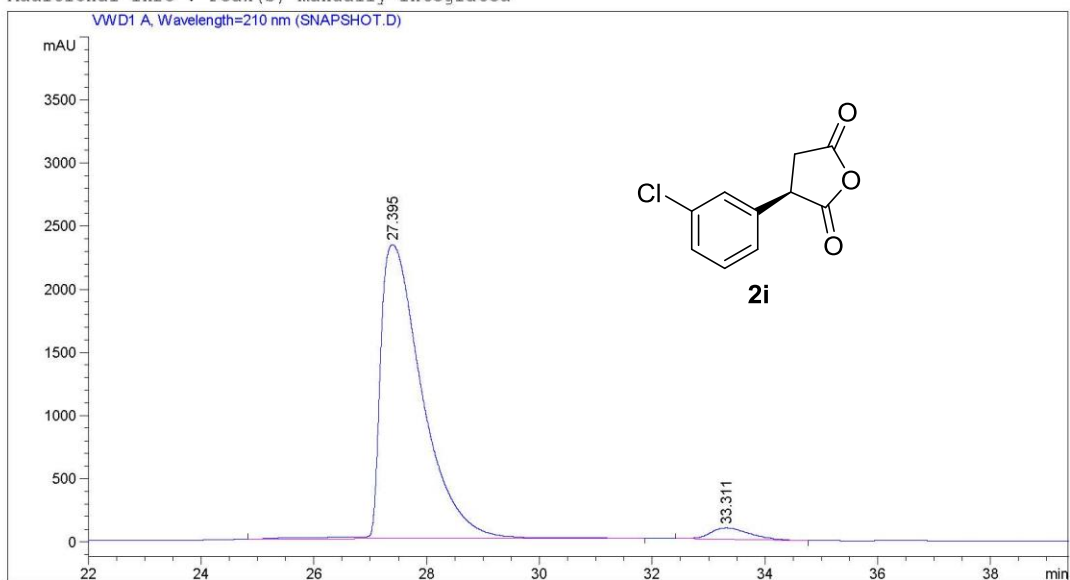

Area Percent Report

```
=====
Sorted By      :      Signal
Multiplier     :      1.0000
Dilution       :      1.0000
Do not use Multiplier & Dilution Factor with ISTDs
=====
```

Signal 1: VWD1 A, Wavelength=210 nm

| Peak # | RetTime [min] | Type | Width [min] | Area [mAU*s] | Height [mAU] | Area %  |
|--------|---------------|------|-------------|--------------|--------------|---------|
| 1      | 27.395        | BB   | 0.7721      | 1.19439e5    | 2329.70044   | 96.4828 |
| 2      | 33.311        | BB   | 0.7331      | 4354.04248   | 90.85255     | 3.5172  |

Totals : 1.23793e5 2420.55299

\*\*\* End of Report \*\*\*

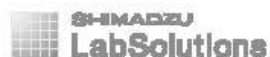

# Analysis Report

## <Sample Information>

Sample Name : sg-me-rac  
 Sample ID :  
 Data Filename : sg-me-rac.gcd  
 Method Filename : b-dex 225-250-100-150-260-30min.gcm  
 Batch Filename : sg-me.gcb  
 Vial # : 27  
 Injection Volume : 1 uL  
 Date Acquired : 2016-12-27 21:19:38  
 Date Processed : 2016-12-27 21:49:43  
 Sample Type : Unknown  
 Acquired by : System Administrator  
 Processed by : System Administrator

## <Chrom atogram>

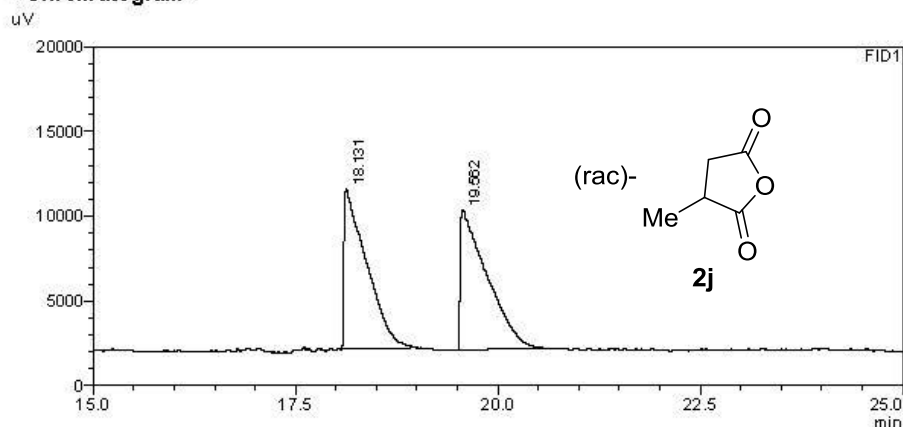

## <Peak Table>

| Peak# | Ret. Time | Area   | Height | Conc.  | Unit | Mark | Name |
|-------|-----------|--------|--------|--------|------|------|------|
| 1     | 18.131    | 181465 | 9448   | 49.078 |      | M    |      |
| 2     | 19.562    | 188286 | 8233   | 50.922 |      | M    |      |
| Total |           | 369751 | 17681  |        |      |      |      |

D:\DATA FILE\HZY\DATA\me\sg-me-rac.gcd

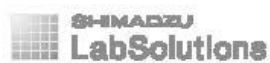

# Analysis Report

## <Sample Information>

|                  |                                       |              |                        |
|------------------|---------------------------------------|--------------|------------------------|
| Sample Name      | : sg-me-2                             | Sample Type  | : Unknown              |
| Sample ID        |                                       |              |                        |
| Data Filename    | : sg-me-2.gcd                         |              |                        |
| Method Filename  | : b-dex 225-250-100-150-260-30min.gcm |              |                        |
| Batch Filename   | : sg-me-2.gcb                         |              |                        |
| Vial #           | : 26                                  |              |                        |
| Injection Volume | : 1 uL                                |              |                        |
| Date Acquired    | : 2016-12-27 22:08:50                 | Acquired by  | : System Administrator |
| Date Processed   | : 2016-12-27 22:38:55                 | Processed by | : System Administrator |

## <Chromatogram>

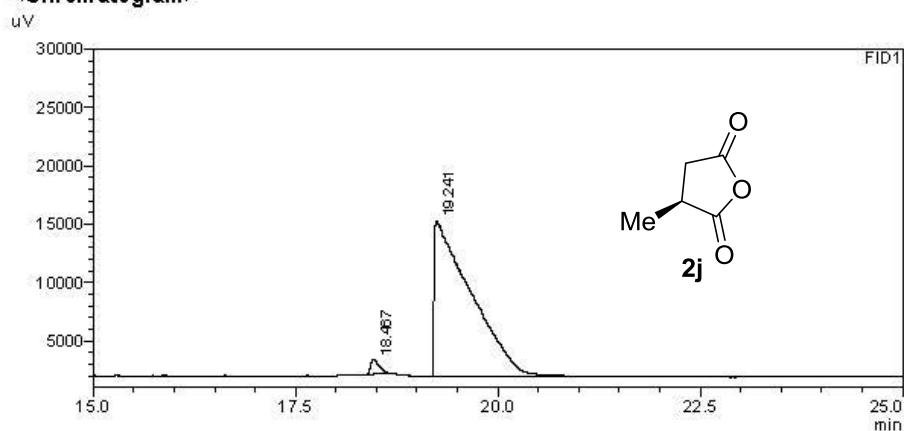

## <Peak Table>

| Peak# | Ret. Time | Area   | Height | Conc.  | Unit | Mark | Name |
|-------|-----------|--------|--------|--------|------|------|------|
| 1     | 18.467    | 9285   | 1258   | 2.163  |      | M    |      |
| 2     | 19.241    | 420072 | 13349  | 97.837 |      | M    |      |
| Total |           | 429357 | 14607  |        |      |      |      |

D:\DATA FILE\HZY\DATA\me\sg-me-2.gcd



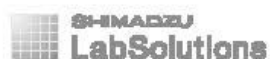

# Analysis Report

## <Sample Information>

|                  |                                               |              |                        |
|------------------|-----------------------------------------------|--------------|------------------------|
| Sample Name      | : ipr-pdc                                     | Sample Type  | : Unknown              |
| Sample ID        |                                               |              |                        |
| Data Filename    | : sg-ipr-pdc-rare-1.gcd                       |              |                        |
| Method Filename  | : b-dex120-250-100(0)-2-120(30)-260-40min.gcm |              |                        |
| Batch Filename   | : hzy-ipr-pdc-rare.gcb                        |              |                        |
| Vial #           | : 26                                          |              |                        |
| Injection Volume | : 1 uL                                        |              |                        |
| Date Acquired    | : 2016-12-29 12:11:30                         | Acquired by  | : System Administrator |
| Date Processed   | : 2016-12-29 12:51:34                         | Processed by | : System Administrator |

## <Chrom atogram>

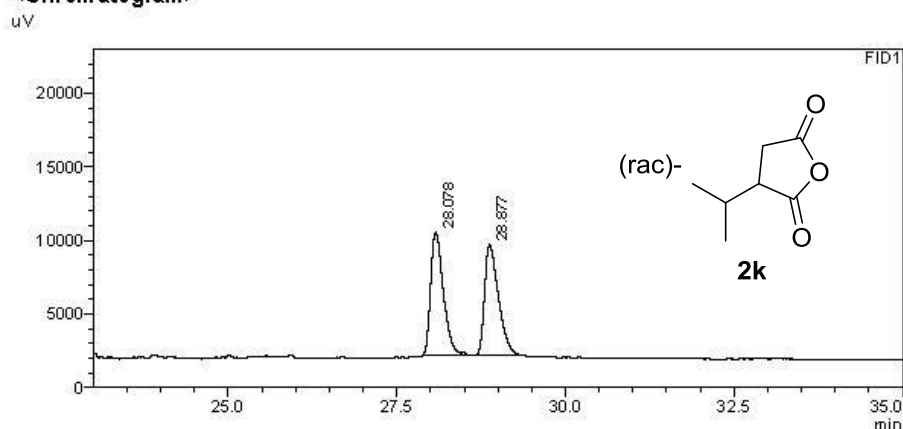

## <Peak Table>

| FID1  |           |        |        |        |      |      |      |
|-------|-----------|--------|--------|--------|------|------|------|
| Peak# | Ret. Time | Area   | Height | Conc.  | Unit | Mark | Name |
| 1     | 28.078    | 109442 | 8392   | 50.552 |      | M    |      |
| 2     | 28.877    | 107050 | 7479   | 49.448 |      | M    |      |
| Total |           | 216492 | 15872  |        |      |      |      |

D:\DATA FILE\HZY\DATA\ipr\sg-ipr-pdc-rare-1.gcd



# Analysis Report

## <Sample Information>

|                  |                                               |              |                        |
|------------------|-----------------------------------------------|--------------|------------------------|
| Sample Name      | : ipr-ee                                      | Sample Type  | : Unknown              |
| Sample ID        |                                               |              |                        |
| Data Filename    | : sg-ipr-ee.gcd                               |              |                        |
| Method Filename  | : b-dex120-250-100(0)-2-120(30)-260-40min.gcm |              |                        |
| Batch Filename   | : hzy-ipr-2.gcb                               |              |                        |
| Vial #           | : 28                                          |              |                        |
| Injection Volume | : 1 uL                                        |              |                        |
| Date Acquired    | : 2016-12-29 9:21:12                          | Acquired by  | : System Administrator |
| Date Processed   | : 2016-12-29 10:01:16                         | Processed by | : System Administrator |

## <Chrom atogram>

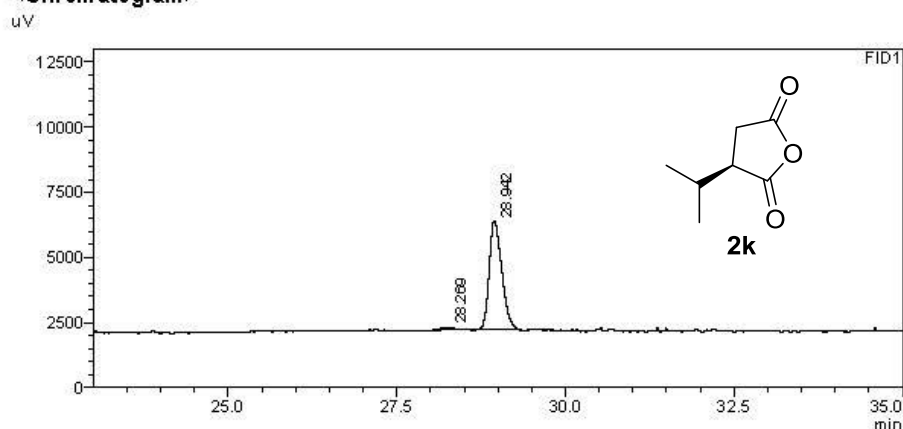

## <Peak Table>

| FID1  |           |       |        |        |      |      |      |
|-------|-----------|-------|--------|--------|------|------|------|
| Peak# | Ret. Time | Area  | Height | Conc.  | Unit | Mark | Name |
| 1     | 28.269    | 1369  | 100    | 2.457  |      | M    |      |
| 2     | 28.942    | 54321 | 4146   | 97.543 |      |      |      |
| Total |           | 55689 | 4246   |        |      |      |      |

D:\DATA FILE\HZY\DATA\ipr\sg-ipr-ee.gcd

Data File E:\DATA\HZY\SUANGAN\BN-161209 2016-12-09 17-05-44\033-0401.D  
Sample Name: BN-RAC

```
=====
Acq. Operator   : SYSTEM                               Seq. Line :    4
Acq. Instrument : 1260HPLC-DAD                         Location  : Vial 33
Injection Date  : 12/9/2016 5:58:53 PM                 Inj       :    1
                                                    Inj Volume: 5.000 µl

Acq. Method     : E:\DATA\HZY\SUANGAN\BN-161209 2016-12-09 17-05-44\DAD-AD(1-2)-950-10-1.0ML-
                  5-ALL-60MIN.M
Last changed    : 12/9/2016 5:11:04 PM by SYSTEM
Analysis Method : E:\DATA\HZY\SUANGAN\BN-161209 2016-12-09 17-05-44\DAD-AD(1-2)-950-10-1.0ML-
                  5-ALL-60MIN.M (Sequence Method)
Last changed    : 12/10/2016 9:56:44 AM by SYSTEM
                  (modified after loading)
Additional Info : Peak(s) manually integrated
=====
```

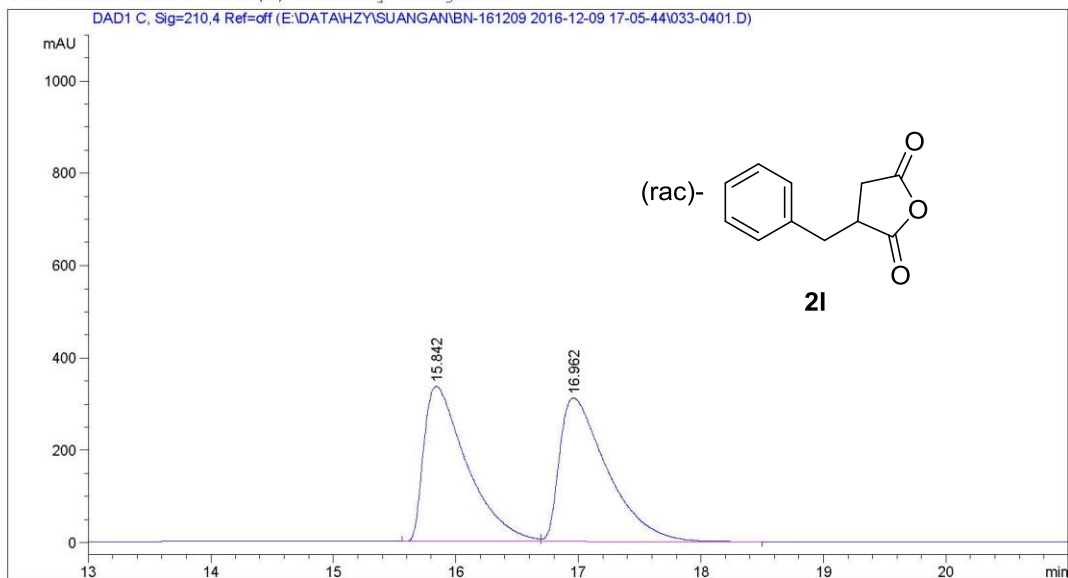

Area Percent Report

```
=====
Sorted By      : Signal
Multiplier     : 1.0000
Dilution       : 1.0000
Do not use Multiplier & Dilution Factor with ISTDs
=====
```

Signal 1: DAD1 C, Sig=210,4 Ref=off

| Peak # | RetTime [min] | Type | Width [min] | Area [mAU*s] | Height [mAU] | Area %  |
|--------|---------------|------|-------------|--------------|--------------|---------|
| 1      | 15.842        | BV   | 0.3619      | 8166.53027   | 335.55035    | 49.3572 |
| 2      | 16.962        | VB   | 0.4002      | 8379.24609   | 311.12848    | 50.6428 |

Totals : 1.65458e4 646.67883

Data File E:\DATA\HZY\SUANGAN\BN-161209 2016-12-09 17-05-44\054-0201.D  
Sample Name: BN-RAC

```
=====
Acq. Operator   : SYSTEM                      Seq. Line :    2
Acq. Instrument : 1260HPLC-DAD                Location  : Vial 54
Injection Date  : 12/9/2016 5:10:55 PM        Inj       :    1
                                           Inj Volume: 5.000 µl

Acq. Method     : E:\DATA\HZY\SUANGAN\BN-161209 2016-12-09 17-05-44\DAD-AD(1-2)-950-10-1.0ML-
                  5-ALL-60MIN.M
Last changed    : 12/9/2016 5:11:04 PM by SYSTEM
                  (modified after loading)
Analysis Method : E:\DATA\HZY\SUANGAN\BN-161209 2016-12-09 17-05-44\DAD-AD(1-2)-950-10-1.0ML-
                  5-ALL-60MIN.M (Sequence Method)
Last changed    : 12/10/2016 10:00:47 AM by SYSTEM
                  (modified after loading)
Additional Info : Peak(s) manually integrated
=====
```

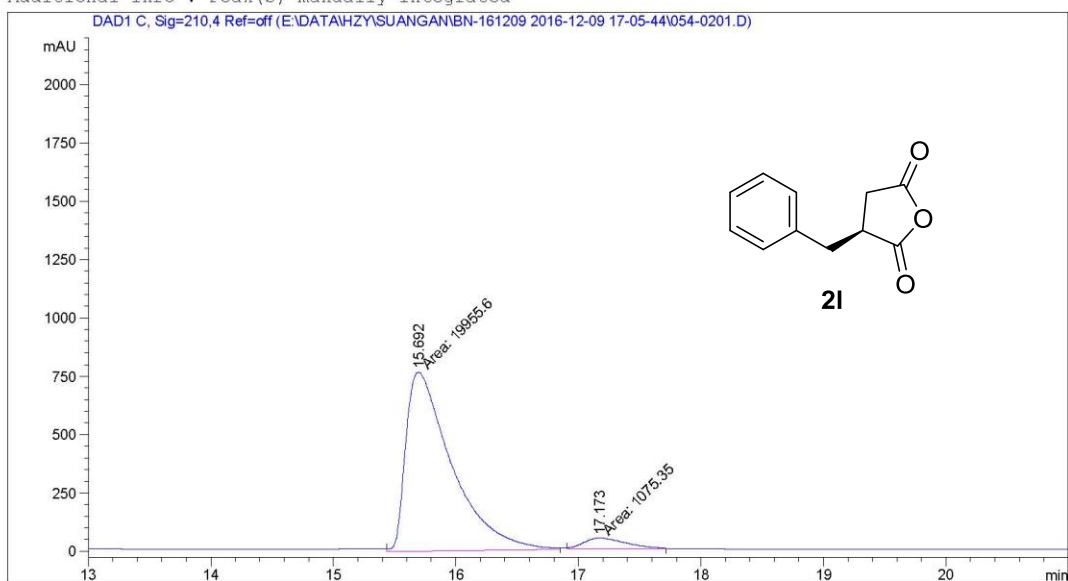

# Area Percent Report

```
=====
Sorted By      :      Signal
Multiplier     :      1.0000
Dilution       :      1.0000
Do not use Multiplier & Dilution Factor with ISTDs
=====
```

Signal 1: DAD1 C, Sig=210,4 Ref=off

| Peak # | RetTime [min] | Type | Width [min] | Area [mAU*s] | Height [mAU] | Area %  |
|--------|---------------|------|-------------|--------------|--------------|---------|
| 1      | 15.692        | MM   | 0.4341      | 1.99556e4    | 766.11902    | 94.8868 |
| 2      | 17.173        | MM   | 0.3986      | 1075.34766   | 44.96540     | 5.1132  |

Totals : 2.10310e4 811.08442

Data File E:\DATA\HZY\SUANGAN\GYQ-170116-DI-OB-EE 2017-01-16 15-34-34\051-0201.D  
Sample Name: BN-S

```
=====
Acq. Operator   : SYSTEM                      Seq. Line :    2
Acq. Instrument : 1260HPLC-DAD                Location  : Vial 51
Injection Date  : 1/16/2017 3:50:09 PM        Inj       :    1
                                           Inj Volume: 10.000 µl
Acq. Method     : E:\DATA\HZY\SUANGAN\GYQ-170116-DI-OB-EE 2017-01-16 15-34-34\DAD-AD(1-6)-90
                  -10-1ML-10UL-ALL-25MIN.M
Last changed    : 1/16/2017 3:34:34 PM by SYSTEM
Analysis Method : E:\DATA\HZY\SUANGAN\GYQ-170116-DI-OB-EE 2017-01-16 15-34-34\DAD-AD(1-6)-90
                  -10-1ML-10UL-ALL-25MIN.M (Sequence Method)
Last changed    : 3/14/2017 9:34:29 AM by SYSTEM
                  (modified after loading)
Additional Info : Peak(s) manually integrated
=====
```

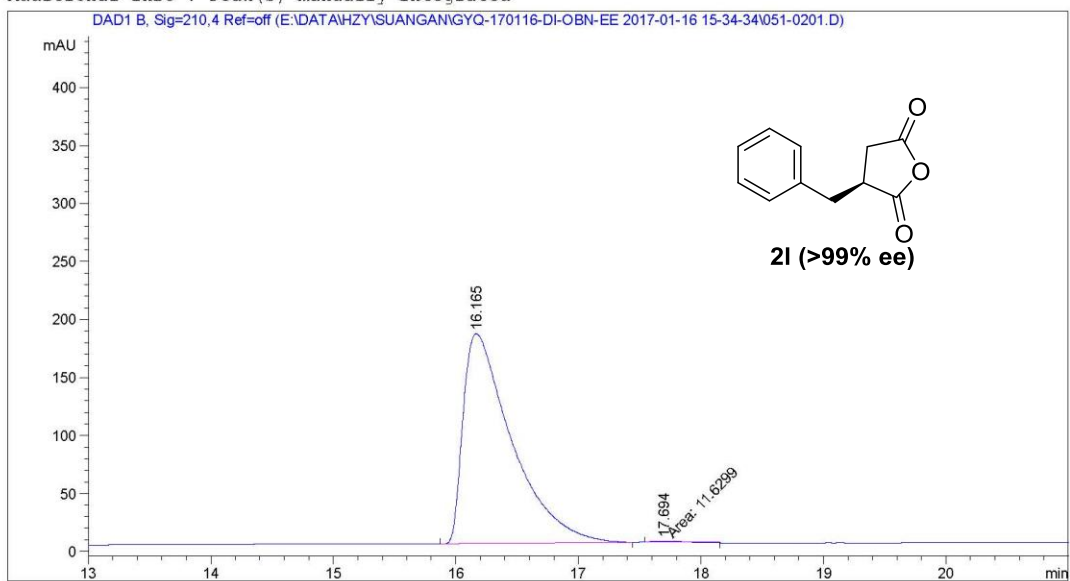

# Area Percent Report

```
=====
Sorted By      :      Signal
Multiplier     :      1.0000
Dilution       :      1.0000
Use Multiplier & Dilution Factor with ISTDs
=====
```

Signal 1: DAD1 B, Sig=210,4 Ref=off

| Peak # | RetTime [min] | Type | Width [min] | Area [mAU*s] | Height [mAU] | Area %  |
|--------|---------------|------|-------------|--------------|--------------|---------|
| 1      | 16.165        | BB   | 0.4027      | 4970.44580   | 180.83931    | 99.7666 |
| 2      | 17.694        | MM   | 0.2396      | 11.62992     | 8.08878e-1   | 0.2334  |

Totals : 4982.07573 181.64819
